# Supplementary material for: Visible light-induced direct alkylation of the purine C8–H bond with ethers
Source: Royal Society of Chemistry journal article supplement (doi:10.1039/d3ob00147d), 2023-01-01
Supplement: d3ob00147d1.pdf [file d3ob00147d1.pdf]

# Supporting Information

## Visible light-induced direct alkylation of the purine C<sub>8</sub>-H bond with ethers

Changtong Lu,<sup>a</sup> Gary Histan<sup>b</sup> and Dongen Lin<sup>\*a</sup>

<sup>a</sup>Key Laboratory of Functional Molecular Engineering of Guangdong Province, School of Chemistry and Chemical Engineering, South China University of Technology, Guangzhou 510641, China.

<sup>b</sup>The International School of Advanced Materials, School of Materials Science and Engineering, South China University of Technology, Guangzhou 510641, China.

E-mail: denlin@scut.edu.cn

### Table of Contents

|                                                                                        |     |
|----------------------------------------------------------------------------------------|-----|
| I . General information .....                                                          | S2  |
| II . General procedure for the visible light-induced direct alkylation of purines..... | S2  |
| III. Optimization of the reaction conditions.....                                      | S2  |
| IV. GC-MS of radical trapping experiment .....                                         | S3  |
| V . GC-MS of the crude product 4b.....                                                 | S4  |
| VI. Light on-off experiment .....                                                      | S5  |
| VII. Fluorescence quenching study .....                                                | S5  |
| VIII. X-ray crystallographic analysis for product 3c .....                             | S7  |
| IX. Characterization data for the synthesized products .....                           | S13 |
| X . NMR spectra for all the compounds.....                                             | S21 |
| XI. References.....                                                                    | S58 |

## I . General information

All reagents are purchased from the commercial suppliers for direct use without further purification. All purchased reagents are of analytical reagent grade unless otherwise noted. Purines with substitutions on C2 or C6 were obtained synthetically from 6-chloropurine and 2,6-dichloropurine using the method of Huang.<sup>1</sup> N7 and N9 substituted purines were synthesized from 9H purines according to the method of Kelley<sup>2</sup> and Çelik<sup>3</sup>. The reaction is monitored by thin-layer chromatography (TLC) using silica gel GF254 plates to observe the reaction process. Column chromatography is generally performed on silica gel (300-400 mesh) purchased from Qingdao Ocean Chemical Co. Ltd. The <sup>1</sup>H, <sup>13</sup>C and <sup>19</sup>F NMR spectra were obtained using Bruker DRX-400 or Bruker Ascend 500 spectrometers, with CDCl<sub>3</sub> or DMSO-*d*<sub>6</sub> as the solvent and TMS or a residual nondeuterated solvent peak as the internal standard. All chemical shifts ( $\delta$ ) are in ppm and the coupling constants (*J*) are in Hz. High resolution mass spectrometry (HRMS) data were recorded on an IF-TOF spectrometer. Melting points were measured using an INESA melting point WRS-2 instrument. The gas chromatography mass spectra were analyzed using the SHIMADZU model GCMS-QP5000 spectrometer. The fluorescence spectra were determined on a Hitachi Fluorescence Spectrophotometer F-7000.

## II . General Procedure for the Visible Light-Induced Direct Alkylation of Purines

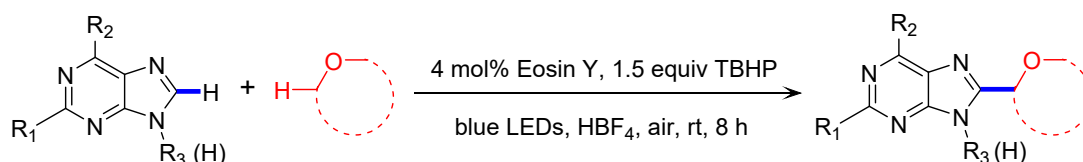

To a dried reaction tube (10 mL, borosilicate glass) equipped with a magnetic stir bar was added purine derivatives (0.15 mmol), ethers (3 mmol), Eosin Y (4 mol%), TBHP (1.5 equiv, 0.225 mmol, aq.65% in water), HBF<sub>4</sub> (2.0 equiv, 0.3 mmol, aq.50% in water). The reaction was stirred at room temperature and blue LEDs (450–460 nm, 20 W, SD produced by Xuzhou Ai Jia Electronic Technology Co. Ltd.) were placed 3 cm from the reaction vessel for 8 hours. After it is complete, the reaction solution is concentrated under reduced pressure and then purified by flash column chromatography on silica gel or preparative TLC on GF254 (petroleum ether/ethyl acetate or dichloromethane/methanol) to afford the 8-alkylpurines.

## III. Optimization of the reaction conditions

Table S1 Optimization of the reaction conditions<sup>a</sup>

| entry | photocatalyst<br>(mol%) | oxidant <sup>b</sup><br>(equiv) | additive<br>(equiv)                 | solvent | yield% <sup>c</sup> |
|-------|-------------------------|---------------------------------|-------------------------------------|---------|---------------------|
| 1     | Eosin Y (4)             | TBHP (1.5)                      | -                                   | THF     | 5%                  |
| 2     | Eosin Y (4)             | TBHP (1.5)                      | TFA (2)                             | THF     | 8%                  |
| 3     | Eosin Y (4)             | TBHP (1.5)                      | MSA (2)                             | THF     | 45%                 |
| 4     | Eosin Y (4)             | TBHP (1.5)                      | HAc (2)                             | THF     | 9%                  |
| 5     | Eosin Y (4)             | TBHP (1.5)                      | Na <sub>2</sub> CO <sub>3</sub> (2) | THF     | N.D.                |
| 6     | Eosin Y (4)             | TBHP (1.5)                      | DABCO (2)                           | THF     | N.D.                |
| 7     | Eosin Y (4)             | TBHP (1.5)                      | HBF <sub>4</sub> (2)                | DCM     | 23%                 |
| 8     | Eosin Y (4)             | TBHP (1.5)                      | HBF <sub>4</sub> (2)                | MeCN    | 10%                 |

|                 |             |            |                      |                  |      |
|-----------------|-------------|------------|----------------------|------------------|------|
| 9               | Eosin Y (4) | TBHP (1.5) | HBF <sub>4</sub> (2) | EtOAc            | 64%  |
| 10              | Eosin Y (4) | TBHP (1.5) | HBF <sub>4</sub> (2) | Acetone          | 86%  |
| 11              | Eosin Y (4) | TBHP (1.5) | HBF <sub>4</sub> (2) | H <sub>2</sub> O | 18%  |
| 12              | Eosin Y (4) | TBHP (1.5) | HBF <sub>4</sub> (2) | DMF              | N.D. |
| 13 <sup>d</sup> | Eosin Y (4) | TBHP (1.5) | HBF <sub>4</sub> (2) | THF              | N.D. |
| 14 <sup>e</sup> | Eosin Y (4) | TBHP (1.5) | HBF <sub>4</sub> (2) | THF              | 49%  |
| 15 <sup>f</sup> | Eosin Y (4) | TBHP (1.5) | HBF <sub>4</sub> (2) | THF              | 75%  |
| 16 <sup>g</sup> | Eosin Y (4) | TBHP (1.5) | HBF <sub>4</sub> (2) | THF              | 91%  |

<sup>a</sup>Reaction conditions: **1a** (0.15 mmol), **2a** (3 mmol), photocatalyst (4 mol%) in solvent (2.0 mL) in air at room temperature while irradiated by 20 W blue LEDs for 8 h. N.D. = not determined. <sup>b</sup>TBHP (65% aq. solution), DTBP (98%). <sup>c</sup>Determined by GC using dodecane as an internal standard. <sup>d</sup>In the dark. <sup>e</sup>Irradiated by 20 W green LEDs. <sup>f</sup>Irradiated by 5 W blue LEDs. <sup>g</sup>Under an Ar atmosphere.

#### IV. GC-MS of radical trapping experiment

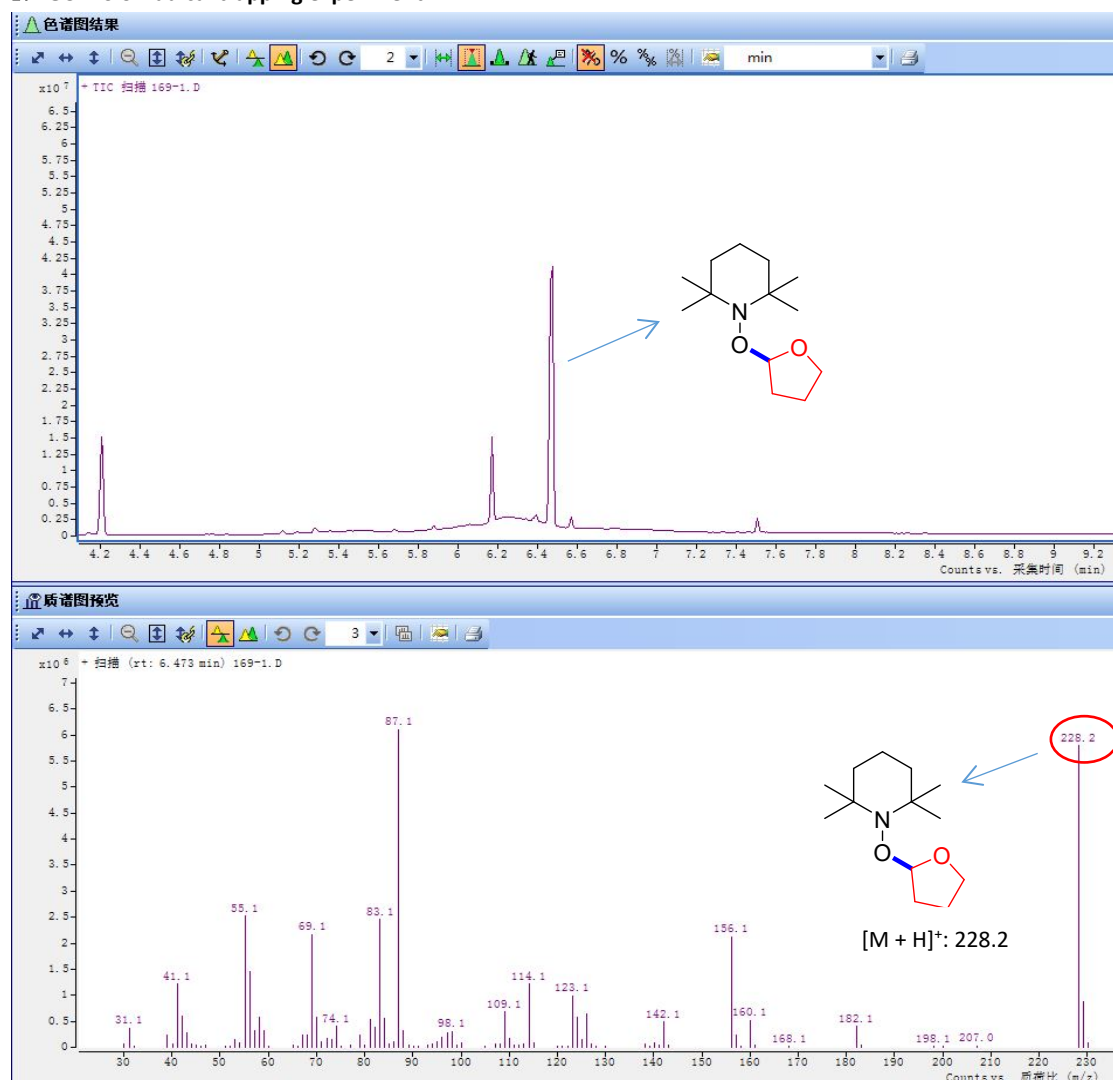

Fig. 1 GC-MS of the adduct of THF with TEMPO

## V. GC-MS of the crude product **4b**

To investigate by-products in the case of free -NH purines, the crude product **4b** was analyzed by GC-MS. From the GC-MS result in Fig. 2, in addition to the expected products and sometimes unreacted starting material, there are small amounts of other side products which we think are the C8 and N9 dialkylated purines. The amount of side products is small when compared to the expected products, so no isolation was carried out.

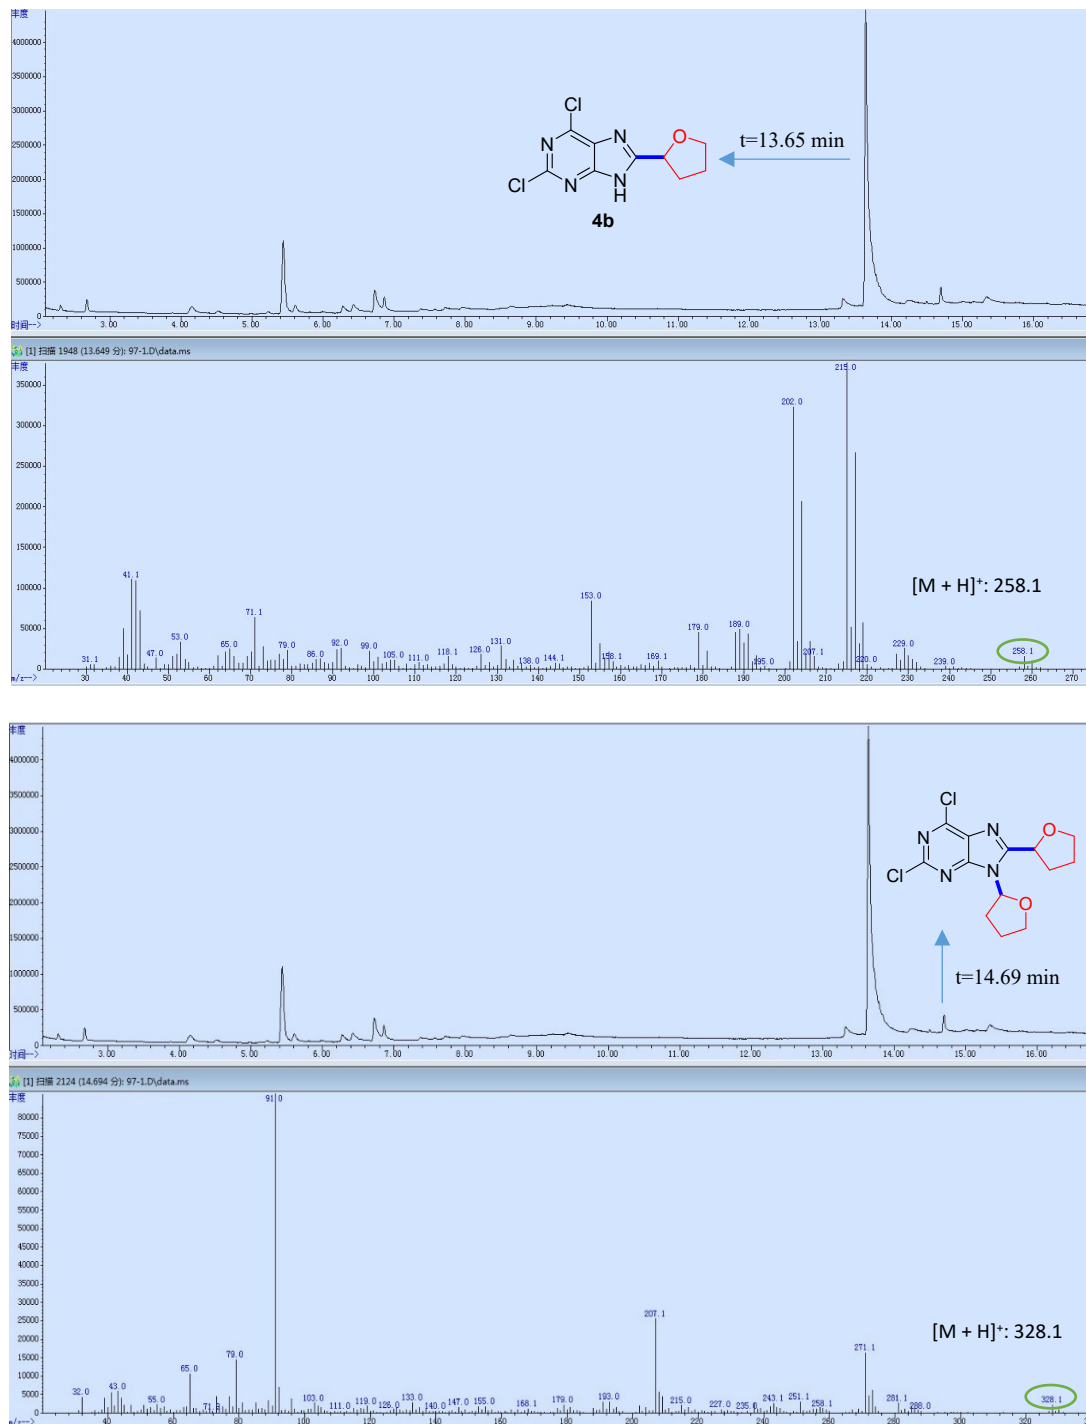

Fig. 2 GC-MS of the crude product **4b**

## VI. Light on-off experiment

To investigate the effect of visible light on the reaction, a light on-off experiment with 9-benzyl-6-chloro-9H-purine (**1a**) and tetrahydrofuran (**2a**) was performed. In this reaction, the light source changed irradiation or darkness condition every 2 hours. The reaction was followed by GC-MS. After the first 2 hours of blue LED exposure, 45% of the expected product was obtained. However, the yield was not improved after 2 hours with the blue LEDs removed. Then the light was turned on again and after 2 hours the yield increased to 70%. No further conversion was detected when the light was turned off. The yield increased by another 14% when the light was turned on again for 2 hours. Subsequently, the yield remained constant after the light was turned off. The light on-off experiment demonstrates that visible light is an essential component of the reaction. Moreover, it also shows that the reaction is not a free radical chain reaction, but more likely proceeds through a photo-redox pathway.

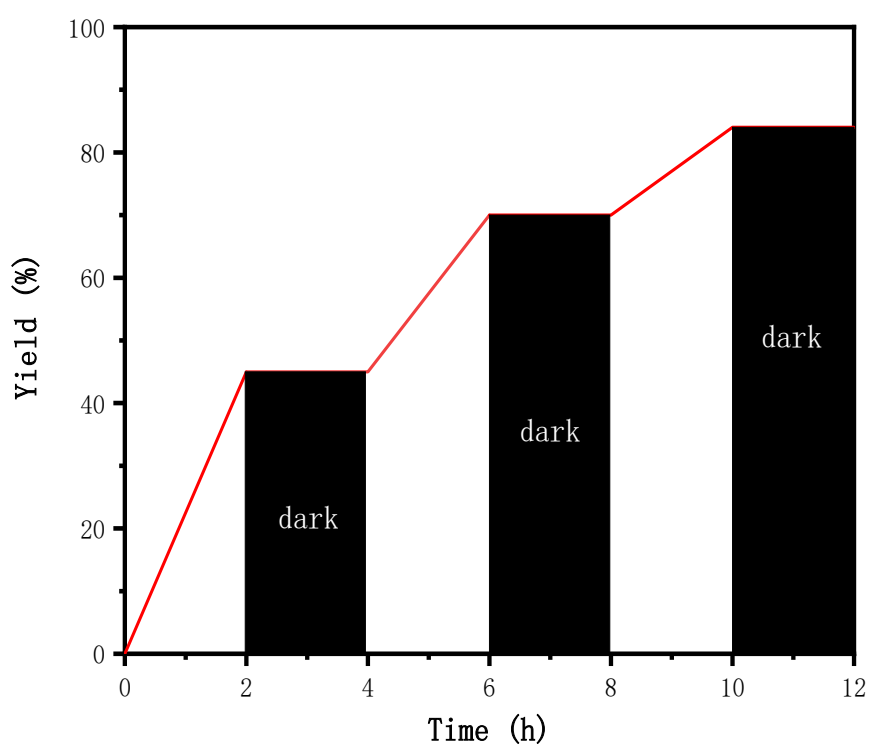

Fig. 3 Light on/off experiment

## VII. Fluorescence quenching study

The fluorescence emission intensities were recorded on a Hitachi Fluorescence Spectrophotometer F-7000. The excitation wavelength was fixed at 528 nm, and the emission wavelength was measured at 558 nm (emission maximum). The solution of Eosin Y (1  $\mu$ M in acetone) and various concentrations of quenchers were irradiated in a light path quartz fluorescence cuvette. Fluorescence quenching was indeed observed for Eosin Y at various concentrations of TBHP. As the TBHP concentration increases, the fluorescence intensity of the Eosin Y gradually decreases. The linear Stern-Volmer plots suggest a possible transfer of electrons between TBHP and the Eosin Y excited state.

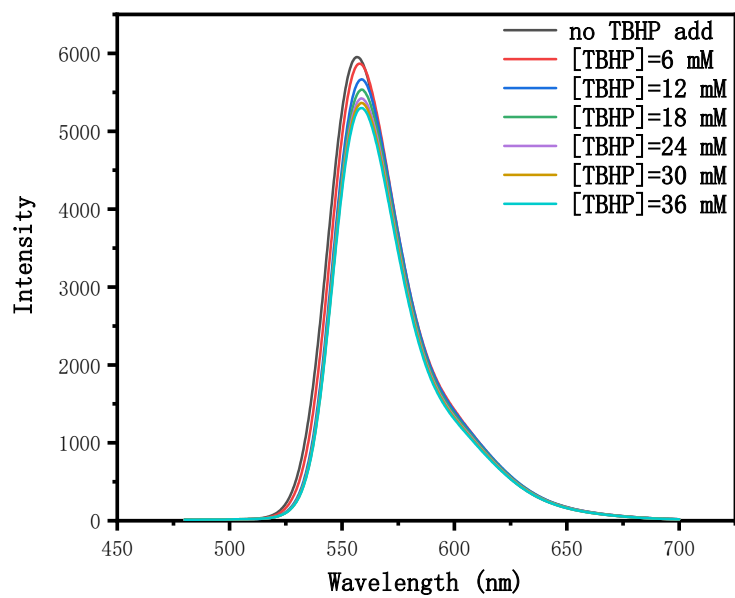

Fig. 4 Fluorescence quenching of Eosin Y with various concentrations of TBHP

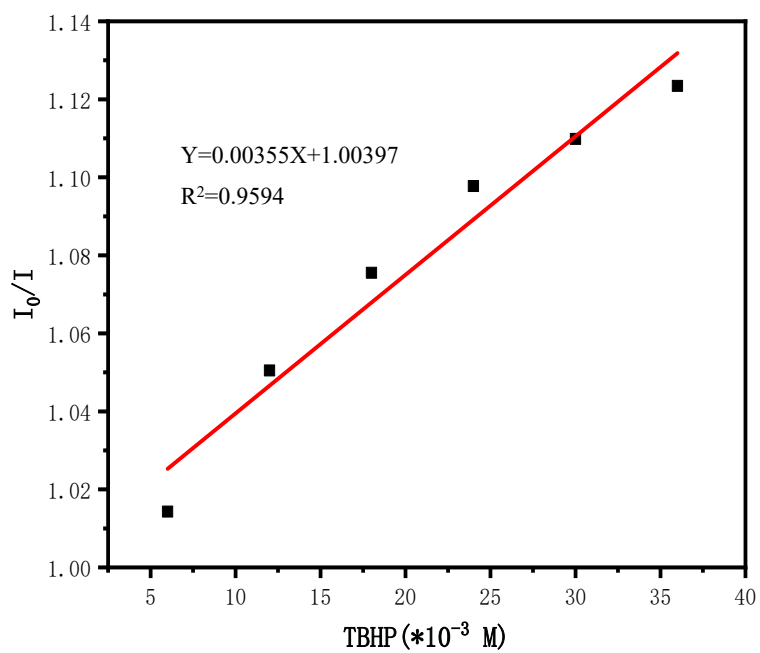

Fig. 5 Stern-Volmer plot for quenching of Eosin Y fluorescence with TBHP

## VIII. X-ray Crystallographic analysis for product **3c**

Crystal data have been deposited to CCDC, number 2211872.

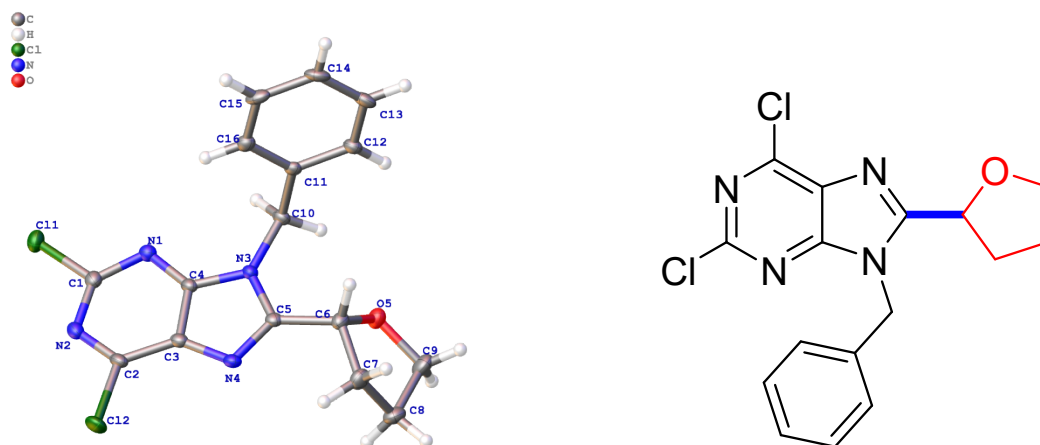

**Fig. 6** The single crystal structure of **3c** (the ellipsoid contour probability level is 50%)

**Crystal sample preparation:** In a 1.5 mL chromatography vial, the purified sample **3c** was dissolved in dichloromethane (0.5 mL). Cyclohexane (1.0 mL) was slowly added dropwise to the vial. The solvent was allowed to evaporate naturally, and crystals were formed. The single crystals formed were analyzed by single crystal X-ray diffraction.

**Table S2** Crystal data and structure refinement for **3c**.

| Identification code                | <b>3c</b>                                                        |
|------------------------------------|------------------------------------------------------------------|
| Empirical formula                  | C <sub>16</sub> H <sub>14</sub> Cl <sub>2</sub> N <sub>4</sub> O |
| Formula weight                     | 349.21                                                           |
| Temperature/K                      | 179.99(10)                                                       |
| Crystal system                     | monoclinic                                                       |
| Space group                        | P2 <sub>1</sub> /c                                               |
| a/Å                                | 4.7826(9)                                                        |
| b/Å                                | 16.631(3)                                                        |
| c/Å                                | 19.594(2)                                                        |
| α/°                                | 90                                                               |
| β/°                                | 90.09(1)                                                         |
| γ/°                                | 90                                                               |
| Volume/Å <sup>3</sup>              | 1558.5(4)                                                        |
| Z                                  | 4                                                                |
| ρ <sub>calc</sub> /cm <sup>3</sup> | 1.488                                                            |
| μ/mm <sup>-1</sup>                 | 3.830                                                            |
| F(000)                             | 720.0                                                            |
| Crystal size/mm <sup>3</sup>       | 0.15 × 0.11 × 0.09                                               |

|                                                |                                                               |
|------------------------------------------------|---------------------------------------------------------------|
| Radiation                                      | Cu K $\alpha$ ( $\lambda = 1.54184$ )                         |
| 2 $\Theta$ range for data collection/ $^\circ$ | 6.972 to 148.236                                              |
| Index ranges                                   | $-4 \leq h \leq 5, -20 \leq k \leq 19, -21 \leq l \leq 24$    |
| Reflections collected                          | 5890                                                          |
| Independent reflections                        | 3034 [ $R_{\text{int}} = 0.0540, R_{\text{sigma}} = 0.0610$ ] |
| Data/restraints/parameters                     | 3034/0/218                                                    |
| Goodness-of-fit on $F^2$                       | 1.029                                                         |
| Final R indexes [ $I \geq 2\sigma(I)$ ]        | $R_1 = 0.0796, wR_2 = 0.2037$                                 |
| Final R indexes [all data]                     | $R_1 = 0.0853, wR_2 = 0.2175$                                 |
| Largest diff. peak/hole / e $\text{\AA}^{-3}$  | 0.78/-0.86                                                    |

### Crystal structure determination of 3c

**Crystal Data** for  $\text{C}_{16}\text{H}_{14}\text{Cl}_2\text{N}_4\text{O}$  ( $M = 349.21$  g/mol): monoclinic, space group  $P2_1/c$  (no. 14),  $a = 4.7826(9)$   $\text{\AA}$ ,  $b = 16.631(3)$   $\text{\AA}$ ,  $c = 19.594(2)$   $\text{\AA}$ ,  $\beta = 90.09(1)^\circ$ ,  $V = 1558.5(4)$   $\text{\AA}^3$ ,  $Z = 4$ ,  $T = 179.99(10)$  K,  $\mu(\text{Cu K}\alpha) = 3.830$   $\text{mm}^{-1}$ ,  $D_{\text{calc}} = 1.488$   $\text{g/cm}^3$ , 5890 reflections measured ( $6.972^\circ \leq 2\Theta \leq 148.236^\circ$ ), 3034 unique ( $R_{\text{int}} = 0.0540, R_{\text{sigma}} = 0.0610$ ) which were used in all calculations. The final  $R_1$  was 0.0796 ( $I > 2\sigma(I)$ ) and  $wR_2$  was 0.2175 (all data).

**Table S3 Fractional Atomic Coordinates ( $\times 10^4$ ) and Equivalent Isotropic Displacement Parameters ( $\text{\AA}^2 \times 10^3$ ) for 3c.  $U_{\text{eq}}$  is defined as 1/3 of the trace of the orthogonalised  $U_{ij}$  tensor.**

| Atom | x           | y          | z          | $U_{\text{eq}}$ |
|------|-------------|------------|------------|-----------------|
| Cl1  | 11957.6(15) | 1757.5(4)  | 2777.9(4)  | 39.4(3)         |
| Cl2  | 5097.5(19)  | 2194.1(5)  | 4818.6(4)  | 46.0(3)         |
| O5   | 3927(4)     | 5773.3(13) | 3299.6(12) | 37.0(5)         |
| N1   | 8719(5)     | 3001.3(15) | 2810.2(12) | 29.1(5)         |
| N2   | 8453(5)     | 2095.8(14) | 3760.4(12) | 32.5(5)         |
| N3   | 5594(4)     | 4135.6(14) | 2934.2(11) | 24.9(5)         |
| N4   | 3667(5)     | 3836.5(15) | 3961.2(11) | 28.6(5)         |
| C1   | 9412(6)     | 2361.1(17) | 3162.3(15) | 30.5(6)         |
| C2   | 6516(6)     | 2549.2(18) | 4062.5(14) | 30.6(6)         |
| C3   | 5571(6)     | 3256.9(17) | 3777.0(13) | 27.3(6)         |
| C4   | 6796(5)     | 3434.6(16) | 3141.9(13) | 25.5(5)         |
| C5   | 3742(5)     | 4353.0(16) | 3451.7(13) | 25.4(5)         |
| C6   | 2043(6)     | 5105.8(17) | 3403.6(14) | 30.5(6)         |
| C7   | 328(7)      | 5290(2)    | 4043.3(17) | 39.4(7)         |
| C8   | 1928(11)    | 5961(3)    | 4376(2)    | 43.4(15)        |
| C9   | 3213(8)     | 6395(2)    | 3767(2)    | 48.7(9)         |
| C10  | 6177(5)     | 4543.3(17) | 2281.3(13) | 26.7(6)         |
| C11  | 3898(5)     | 4425.2(17) | 1760.4(13) | 25.5(6)         |
| C12  | 2706(6)     | 5098.0(18) | 1458.0(14) | 31.0(6)         |
| C13  | 668(7)      | 5012(2)    | 961.9(14)  | 37.2(7)         |
| C14  | -160(7)     | 4253(2)    | 763.8(14)  | 40.2(7)         |



**Table S3 Fractional Atomic Coordinates ( $\times 10^4$ ) and Equivalent Isotropic Displacement Parameters ( $\text{\AA}^2 \times 10^3$ ) for 3c.  $U_{\text{eq}}$  is defined as 1/3 of the trace of the orthogonalised  $U_{ij}$  tensor.**

| Atom | x       | y          | z          | U(eq)   |
|------|---------|------------|------------|---------|
| C15  | 1030(7) | 3581(2)    | 1063.0(16) | 38.4(7) |
| C16  | 3052(6) | 3664.9(18) | 1558.8(15) | 32.3(6) |
| C17  | 530(60) | 6223(15)   | 4101(15)   | 57(10)  |

**Table S4 Anisotropic Displacement Parameters ( $\text{\AA}^2 \times 10^3$ ) for 3c. The Anisotropic displacement factor exponent takes the form:  $-2\pi^2[h^2a^*U_{11}+2hka^*b^*U_{12}+\dots]$ .**

| Atom | $U_{11}$ | $U_{22}$ | $U_{33}$ | $U_{23}$  | $U_{13}$ | $U_{12}$  |
|------|----------|----------|----------|-----------|----------|-----------|
| C1   | 45.1(5)  | 28.3(5)  | 44.8(5)  | -2.8(3)   | -1.1(3)  | 8.0(3)    |
| Cl2  | 74.0(6)  | 41.0(5)  | 22.9(4)  | 12.6(3)   | 2.5(3)   | 2.5(4)    |
| O5   | 48.1(11) | 25.3(11) | 37.4(12) | -1.2(9)   | 5.7(9)   | 0.2(8)    |
| N1   | 36.4(11) | 26.0(11) | 24.9(11) | 0.1(10)   | -0.4(8)  | -0.7(9)   |
| N2   | 46.8(13) | 24.4(12) | 26.5(12) | 1.4(10)   | -7.8(10) | 0.4(10)   |
| N3   | 34.5(10) | 22.0(11) | 18.2(11) | 1.2(8)    | -1.9(8)  | 1.1(8)    |
| N4   | 40.9(11) | 28.9(12) | 16.1(10) | 0.1(9)    | -2.4(8)  | 0.2(9)    |
| C1   | 39.4(13) | 24.8(14) | 27.3(14) | -2.6(11)  | -5.7(10) | 0.4(10)   |
| C2   | 46.9(14) | 27.5(14) | 17.3(12) | 3.3(11)   | -5.5(10) | -3.5(11)  |
| C3   | 37.4(13) | 26.7(14) | 17.8(12) | 0.2(10)   | -2.7(9)  | -3.8(10)  |
| C4   | 36.0(12) | 22.9(13) | 17.7(12) | 0.4(10)   | -3.4(9)  | -1.7(10)  |
| C5   | 32.1(12) | 25.6(13) | 18.5(12) | -2.0(10)  | -4.7(9)  | -1.2(10)  |
| C6   | 34.6(13) | 28.6(14) | 28.4(14) | -4.5(11)  | -4.7(10) | 4.3(10)   |
| C7   | 42.6(14) | 36.5(17) | 39.0(16) | -5.8(14)  | 6.6(12)  | 6.5(12)   |
| C8   | 57(3)    | 44(3)    | 29(2)    | -11.1(19) | -1.3(18) | 3(2)      |
| C9   | 67(2)    | 32.7(17) | 47(2)    | -15.5(15) | 3.3(16)  | 1.9(15)   |
| C10  | 35.2(12) | 25.4(13) | 19.4(12) | 4.4(10)   | -0.1(9)  | -3.0(10)  |
| C11  | 34.7(12) | 25.4(13) | 16.2(11) | 0.8(9)    | 3.4(9)   | -1.7(9)   |
| C12  | 42.5(14) | 30.7(15) | 19.8(12) | 3.4(11)   | -1.9(10) | -2.2(11)  |
| C13  | 47.7(15) | 44.3(19) | 19.6(13) | 10.7(13)  | -4.1(11) | -4.8(13)  |
| C14  | 49.7(16) | 56(2)    | 14.7(12) | 1.2(13)   | -3.5(11) | -8.6(14)  |
| C15  | 53.3(16) | 39.6(18) | 22.3(13) | -11.5(12) | 4.8(11)  | -16.7(13) |
| C16  | 43.8(14) | 29.1(15) | 24.2(13) | -0.9(11)  | 5.0(11)  | -2.8(11)  |
| C17  | 76(17)   | 40(13)   | 54(17)   | -22(11)   | 30(14)   | 10(11)    |

**Table S5 Bond Lengths for 3c.**

| Atom Atom | Length/ $\text{\AA}$ | Atom Atom | Length/ $\text{\AA}$ |
|-----------|----------------------|-----------|----------------------|
|-----------|----------------------|-----------|----------------------|

**Table S5 Bond Lengths for 3c.**

| Atom | Atom | Length/Å | Atom | Atom | Length/Å |
|------|------|----------|------|------|----------|
| C11  | C1   | 1.748(3) | C3   | C4   | 1.407(4) |
| C12  | C2   | 1.733(3) | C5   | C6   | 1.496(4) |
| O5   | C6   | 1.444(4) | C6   | C7   | 1.529(4) |
| O5   | C9   | 1.423(4) | C7   | C8   | 1.502(5) |
| N1   | C1   | 1.311(4) | C7   | C17  | 1.56(2)  |
| N1   | C4   | 1.337(4) | C8   | C9   | 1.524(6) |
| N2   | C1   | 1.334(4) | C9   | C17  | 1.47(2)  |
| N2   | C2   | 1.333(4) | C10  | C11  | 1.506(4) |
| N3   | C4   | 1.362(3) | C11  | C12  | 1.389(4) |
| N3   | C5   | 1.394(3) | C11  | C16  | 1.385(4) |
| N3   | C10  | 1.475(3) | C12  | C13  | 1.384(4) |
| N4   | C3   | 1.374(4) | C13  | C14  | 1.378(5) |
| N4   | C5   | 1.318(4) | C14  | C15  | 1.384(5) |
| C2   | C3   | 1.379(4) | C15  | C16  | 1.378(4) |

**Table S6 Bond Angles for 3c.**

| Atom | Atom | Atom | Angle/°  | Atom | Atom | Atom | Angle/°  |
|------|------|------|----------|------|------|------|----------|
| C9   | O5   | C6   | 108.6(2) | N4   | C5   | N3   | 113.5(2) |
| C1   | N1   | C4   | 110.8(2) | N4   | C5   | C6   | 125.3(2) |
| C2   | N2   | C1   | 116.2(2) | O5   | C6   | C5   | 108.3(2) |
| C4   | N3   | C5   | 105.8(2) | O5   | C6   | C7   | 107.2(2) |
| C4   | N3   | C10  | 124.9(2) | C5   | C6   | C7   | 114.0(3) |
| C5   | N3   | C10  | 129.2(2) | C6   | C7   | C17  | 103.0(8) |
| C5   | N4   | C3   | 103.9(2) | C8   | C7   | C6   | 103.4(3) |
| N1   | C1   | C11  | 114.6(2) | C7   | C8   | C9   | 102.6(3) |
| N1   | C1   | N2   | 130.1(3) | O5   | C9   | C8   | 104.8(3) |
| N2   | C1   | C11  | 115.3(2) | O5   | C9   | C17  | 110.8(9) |
| N2   | C2   | C12  | 117.3(2) | N3   | C10  | C11  | 113.0(2) |
| N2   | C2   | C3   | 122.0(3) | C12  | C11  | C10  | 118.8(2) |
| C3   | C2   | C12  | 120.6(2) | C16  | C11  | C10  | 121.6(3) |
| N4   | C3   | C2   | 135.2(3) | C16  | C11  | C12  | 119.6(3) |
| N4   | C3   | C4   | 111.2(2) | C13  | C12  | C11  | 120.4(3) |
| C2   | C3   | C4   | 113.7(3) | C14  | C13  | C12  | 119.7(3) |
| N1   | C4   | N3   | 127.3(2) | C13  | C14  | C15  | 120.1(3) |
| N1   | C4   | C3   | 127.1(3) | C16  | C15  | C14  | 120.4(3) |
| N3   | C4   | C3   | 105.6(2) | C15  | C16  | C11  | 119.9(3) |

**Table S6 Bond Angles for 3c.**

| Atom Atom Atom | Angle/°  | Atom Atom Atom | Angle/°   |
|----------------|----------|----------------|-----------|
| N3 C5 C6       | 121.1(2) | C9 C17 C7      | 102.4(13) |

**Table S7 Torsion Angles for 3c.**

| A B C D        | Angle/°     | A B C D         | Angle/°   |
|----------------|-------------|-----------------|-----------|
| C12 C2 C3 N4   | 3.1(5)      | C4 N3 C5 C6     | 179.4(2)  |
| C12 C2 C3 C4   | -175.9(2)   | C4 N3 C10 C11   | 103.2(3)  |
| O5 C6 C7 C8    | -15.3(4)    | C5 N3 C4 N1     | -179.8(3) |
| O5 C6 C7 C17   | 22.4(15)    | C5 N3 C4 C3     | 0.7(3)    |
| O5 C9 C17 C7   | 24(2)       | C5 N3 C10 C11   | -75.4(3)  |
| N2 C2 C3 N4    | -179.6(3)   | C5 N4 C3 C2     | -179.3(3) |
| N2 C2 C3 C4    | 1.3(4)      | C5 N4 C3 C4     | -0.2(3)   |
| N3 C5 C6 O5    | -55.4(3)    | C5 C6 C7 C8     | 104.6(4)  |
| N3 C5 C6 C7    | -174.7(2)   | C5 C6 C7 C17    | 142.3(15) |
| N3 C10 C11 C12 | 126.1(3)    | C6 O5 C9 C8     | 28.2(4)   |
| N3 C10 C11 C16 | -56.5(3)    | C6 O5 C9 C17    | -10.9(17) |
| N4 C3 C4 N1    | -179.8(2)   | C6 C7 C8 C9     | 31.0(4)   |
| N4 C3 C4 N3    | -0.4(3)     | C6 C7 C17 C9    | -28(2)    |
| N4 C5 C6 O5    | 125.0(3)    | C7 C8 C9 O5     | -37.0(4)  |
| N4 C5 C6 C7    | 5.7(4)      | C9 O5 C6 C5     | -131.7(3) |
| C1 N1 C4 N3    | 179.8(2)    | C9 O5 C6 C7     | -8.2(3)   |
| C1 N1 C4 C3    | -0.8(4)     | C10 N3 C4 N1    | 1.3(4)    |
| C1 N2 C2 Cl2   | 176.7(2)    | C10 N3 C4 C3    | -178.1(2) |
| C1 N2 C2 C3    | -0.6(4)     | C10 N3 C5 N4    | 177.9(2)  |
| C2 N2 C1 Cl1   | 179.8(2)    | C10 N3 C5 C6    | -1.8(4)   |
| C2 N2 C1 N1    | -1.2(4)     | C10 C11 C12 C13 | 178.0(2)  |
| C2 C3 C4 N1    | -0.5(4)     | C10 C11 C16 C15 | -177.7(2) |
| C2 C3 C4 N3    | 178.9(2)    | C11 C12 C13 C14 | -0.6(4)   |
| C3 N4 C5 N3    | 0.7(3)      | C12 C11 C16 C15 | -0.3(4)   |
| C3 N4 C5 C6    | -179.7(2)   | C12 C13 C14 C15 | 0.4(4)    |
| C4 N1 C1 Cl1   | -179.18(18) | C13 C14 C15 C16 | -0.2(4)   |
| C4 N1 C1 N2    | 1.8(4)      | C14 C15 C16 C11 | 0.1(4)    |
| C4 N3 C5 N4    | -0.9(3)     | C16 C11 C12 C13 | 0.5(4)    |

**Table S8 Hydrogen Atom Coordinates ( $\text{\AA}\times 10^4$ ) and Isotropic Displacement Parameters ( $\text{\AA}^2\times 10^3$ ) for 3c.**

| Atom | x | y | z | U(eq) |
|------|---|---|---|-------|
|------|---|---|---|-------|

**Table S8 Hydrogen Atom Coordinates ( $\text{\AA}\times 10^4$ ) and Isotropic Displacement Parameters ( $\text{\AA}^2\times 10^3$ ) for 3c.**

| <b>Atom</b> | <b>x</b> | <b>y</b> | <b>z</b> | <b>U(eq)</b> |
|-------------|----------|----------|----------|--------------|
| H6          | 780.29   | 5065.17  | 3011.16  | 37           |
| H7AA        | -1551.63 | 5459.17  | 3925.26  | 47           |
| H7AB        | 221.87   | 4824.01  | 4340.14  | 47           |
| H7BC        | 1122.75  | 5030.25  | 4441.93  | 47           |
| H7BD        | -1596.6  | 5116.86  | 3989.67  | 47           |
| H8A         | 3360.67  | 5753.88  | 4678.99  | 52           |
| H8B         | 694.22   | 6312.83  | 4630.86  | 52           |
| H9AA        | 1880.02  | 6764.35  | 3564.79  | 58           |
| H9AB        | 4862.76  | 6693.71  | 3903.75  | 58           |
| H9BC        | 3091.15  | 6903.05  | 3525.72  | 58           |
| H9BD        | 4665.74  | 6442.52  | 4110.21  | 58           |
| H10A        | 7921.97  | 4340     | 2097.19  | 32           |
| H10B        | 6409.59  | 5114.22  | 2364.89  | 32           |
| H12         | 3280.87  | 5609.3   | 1589.46  | 37           |
| H13         | -139.31  | 5463.6   | 763.32   | 45           |
| H14         | -1519.72 | 4192.68  | 428.5    | 48           |
| H15         | 461.51   | 3070.49  | 928.52   | 46           |
| H16         | 3847.86  | 3211.66  | 1757.77  | 39           |
| H17A        | -1008.79 | 6483.28  | 3864.4   | 68           |
| H17B        | 537.96   | 6395.41  | 4573.71  | 68           |

**Table S9 Atomic Occupancy for 3c.**

| <b>Atom</b> | <b>Occupancy</b> | <b>Atom</b> | <b>Occupancy</b> | <b>Atom</b> | <b>Occupancy</b> |
|-------------|------------------|-------------|------------------|-------------|------------------|
| H7AA        | 0.822(16)        | H7AB        | 0.822(16)        | H7BC        | 0.178(16)        |
| H7BD        | 0.178(16)        | C8          | 0.822(16)        | H8A         | 0.822(16)        |
| H8B         | 0.822(16)        | H9AA        | 0.822(16)        | H9AB        | 0.822(16)        |
| H9BC        | 0.178(16)        | H9BD        | 0.178(16)        | C17         | 0.178(16)        |
| H17A        | 0.178(16)        | H17B        | 0.178(16)        |             |                  |

## IX. Characterization data for the synthesized products

### 9-benzyl-6-chloro-8-(tetrahydrofuran-2-yl)-9H-purine (3a)

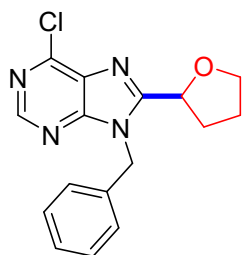

Yellow oily liquid (43.4 mg); 92% yield (eluent: petroleum ether/ethyl acetate = 5:1);  $^1\text{H}$  NMR (400 MHz, Chloroform-*d*)  $\delta$  8.74 (s, 1H), 7.33–7.27 (m, 3H), 7.25–7.18 (m, 2H), 5.76 (d,  $J$  = 15.5 Hz, 1H), 5.60 (d,  $J$  = 15.4 Hz, 1H), 5.05 (dd,  $J$  = 7.5, 5.9 Hz, 1H), 3.97–3.87 (m, 2H), 2.80–2.70 (m, 1H), 2.30–2.20 (m, 1H), 2.14–1.98 (m, 2H);  $^{13}\text{C}$  NMR (101 MHz, Chloroform-*d*)  $\delta$  157.02, 153.82, 151.87, 150.29, 135.55, 130.37, 128.93, 128.22, 127.33, 73.92, 69.13, 46.77, 29.13, 25.80; HRMS (ESI) calcd for  $\text{C}_{16}\text{H}_{16}\text{N}_4\text{OCl}$ ,  $[\text{M} + \text{H}]^+$ : 315.1013, found: 315.1012.

### 6-chloro-9-ethyl-8-(tetrahydrofuran-2-yl)-9H-purine (3b)

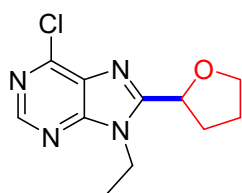

Pale yellow solid (34.2 mg); 90% yield (eluent: petroleum ether/ethyl acetate = 5:1); mp: 86.3–86.7°C;  $^1\text{H}$  NMR (400 MHz, Chloroform-*d*)  $\delta$  8.68 (s, 1H), 5.25–5.17 (m, 1H), 4.50–4.40 (m, 2H), 3.94 (h,  $J$  = 8.2 Hz, 2H), 2.88–2.79 (m, 1H), 2.43–2.33 (m, 1H), 2.22–2.13 (m, 1H), 2.12–2.05 (m, 1H), 1.48 (t,  $J$  = 7.2 Hz, 3H);  $^{13}\text{C}$  NMR (101 MHz, Chloroform-*d*)  $\delta$  156.61, 153.32, 151.45, 150.04, 130.57, 73.70, 69.14, 39.12, 29.34, 25.97, 15.18; HRMS (ESI) calcd for  $\text{C}_{11}\text{H}_{14}\text{N}_4\text{OCl}$ ,  $[\text{M} + \text{H}]^+$ : 253.0856, found: 253.0864.

### 9-benzyl-2,6-dichloro-8-(tetrahydrofuran-2-yl)-9H-purine (3c)

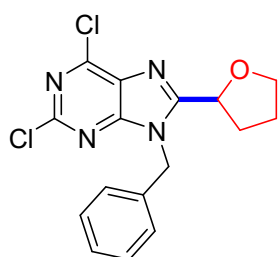

White solid (48.2 mg); 92% yield (eluent: petroleum ether/ethyl acetate = 5:1); mp: 118.2–119.1°C;  $^1\text{H}$  NMR (400 MHz, Chloroform-*d*)  $\delta$  7.32–7.25 (m, 3H), 7.22–7.18 (m, 2H), 5.69 (d,  $J$  = 15.4 Hz, 1H), 5.54 (d,  $J$  = 15.4 Hz, 1H), 4.98 (dd,  $J$  = 7.5, 5.9 Hz, 1H), 3.94–3.84 (m, 2H), 2.76–2.63 (m, 1H), 2.25–2.16 (m, 1H), 2.11–1.95 (m, 2H);  $^{13}\text{C}$  NMR (101 MHz, Chloroform-*d*)  $\delta$  157.88, 155.11, 152.66, 150.90, 135.05, 129.43, 128.99, 128.38, 127.45, 73.80, 69.19, 46.95, 29.02, 25.76; HRMS (ESI) calcd for  $\text{C}_{16}\text{H}_{15}\text{N}_4\text{OCl}_2$ ,  $[\text{M} + \text{H}]^+$ : 349.0623, found: 349.0616.

### 2,6-dichloro-9-ethyl-8-(tetrahydrofuran-2-yl)-9H-purine (3d)

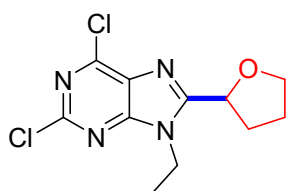

Pale yellow solid (39.2 mg); 91% yield (eluent: petroleum ether/ethyl acetate = 5:1); mp: 106.9–107.1°C;  $^1\text{H}$  NMR (400 MHz, Chloroform-*d*)  $\delta$  5.17 (dd,  $J$  = 7.5, 6.0 Hz, 1H), 4.47–4.36 (m, 2H), 3.98–3.88 (m, 2H), 2.86–2.77 (m, 1H), 2.42–2.33 (m, 1H), 2.22–2.13 (m, 1H), 2.10–2.02 (m, 1H), 1.47 (t,  $J$  = 7.2 Hz, 3H);  $^{13}\text{C}$  NMR (101 MHz, Chloroform-*d*)  $\delta$  157.47, 154.69, 152.31, 150.72, 129.68, 73.64, 69.21, 39.34, 29.28, 25.93, 15.15; HRMS (ESI) calcd for  $\text{C}_{11}\text{H}_{13}\text{N}_4\text{OCl}_2$ ,  $[\text{M} + \text{H}]^+$ : 287.0466, found: 287.0469.

### 9-benzyl-2-bromo-6-chloro-8-(tetrahydrofuran-2-yl)-9H-purine (3e)

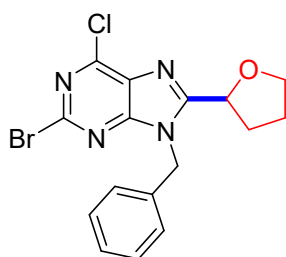

White solid (50.3 mg); 85% yield (eluent: petroleum ether/ethyl acetate = 7:1); mp: 137.9–138.6°C;  $^1\text{H}$  NMR (500 MHz, Chloroform-*d*)  $\delta$  7.27–7.19 (m, 3H), 7.17–7.10 (m, 2H), 5.62 (dd,  $J$  = 15.4, 6.0 Hz, 1H), 5.47 (dd,  $J$  = 15.4, 3.3 Hz, 1H), 4.90 (dd,  $J$  = 7.5, 5.7 Hz, 1H), 3.82 (dt,  $J$  = 14.1, 7.4 Hz, 2H), 2.69–2.58 (m, 1H), 2.19–2.09 (m, 1H), 2.04–1.96 (m, 1H), 1.96–1.87 (m, 1H);  $^{13}\text{C}$  NMR (126 MHz, Chloroform-*d*)  $\delta$  157.65, 155.06, 150.62, 142.78, 135.07, 129.81, 128.98, 128.37, 127.46, 73.81, 69.17, 46.97, 29.03, 25.74; HRMS (ESI) calcd for  $\text{C}_{16}\text{H}_{15}\text{N}_4\text{OClBr}$ ,  $[\text{M} + \text{H}]^+$ : 393.0118, found: 393.0120.

**9-benzyl-6-methoxy-8-(tetrahydrofuran-2-yl)-9H-purine (3f)**

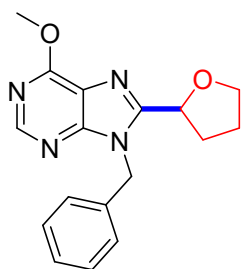

White solid (41.4 mg); 89% yield (eluent: petroleum ether/ethyl acetate = 4:1); mp: 90.8–91.8°C; <sup>1</sup>H NMR (400 MHz, Chloroform-*d*) δ 8.56 (s, 1H), 7.31–7.26 (m, 3H), 7.24–7.16 (m, 2H), 5.74 (d, *J* = 15.6 Hz, 1H), 5.56 (d, *J* = 15.6 Hz, 1H), 5.01 (dd, *J* = 7.4, 5.8 Hz, 1H), 4.20 (s, 3H), 3.94–3.82 (m, 2H), 2.88–2.78 (m, 1H), 2.23–2.07 (m, 2H), 2.01–1.92 (m, 1H); <sup>13</sup>C NMR (101 MHz, Chloroform-*d*) δ 160.76, 153.97, 153.58, 152.09, 136.18, 128.81, 127.92, 127.18, 119.99, 73.63, 68.85, 54.18, 46.30, 28.73, 25.88; HRMS (ESI) calcd for C<sub>17</sub>H<sub>19</sub>N<sub>4</sub>O<sub>2</sub>, [M + H]<sup>+</sup>: 311.1508, found: 311.1511.

**9-ethyl-6-methoxy-8-(tetrahydrofuran-2-yl)-9H-purine (3g)**

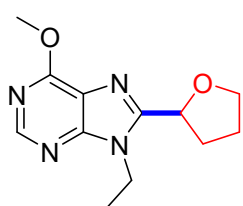

Pale yellow solid (33.5 mg); 90% yield (eluent: petroleum ether/ethyl acetate = 4:1); mp: 89.1–89.9°C; <sup>1</sup>H NMR (400 MHz, Chloroform-*d*) δ 8.49 (s, 1H), 5.16 (dd, *J* = 7.5, 5.9 Hz, 1H), 4.45–4.36 (m, 2H), 4.15 (s, 3H), 3.95–3.83 (m, 2H), 2.95–2.85 (m, 1H), 2.33–2.25 (m, 1H), 2.19–2.11 (m, 1H), 2.06–1.98 (m, 1H), 1.45 (t, *J* = 7.2 Hz, 3H); <sup>13</sup>C NMR (101 MHz, Chloroform-*d*) δ 160.62, 153.40, 153.06, 151.66, 120.18, 73.34, 68.85, 54.06, 38.58, 28.89, 26.02, 15.34; HRMS (ESI) calcd for C<sub>12</sub>H<sub>17</sub>N<sub>4</sub>O<sub>2</sub>, [M + H]<sup>+</sup>: 249.1352, found:

249.1351.

**isopropyl-2-(6-methoxy-8-(tetrahydrofuran-2-yl)-9H-purin-9-yl)acetate (3h)**

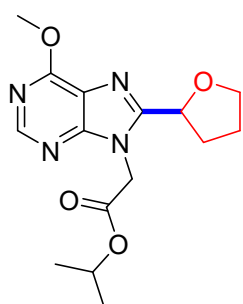

Pale yellow solid (40.5 mg); 84% yield (eluent: petroleum ether/ethyl acetate = 3:1); mp: 98.2–98.6°C; <sup>1</sup>H NMR (400 MHz, Chloroform-*d*) δ 8.44 (s, 1H), 5.14–5.09 (m, 1H), 5.08 (s, 2H), 5.03–4.98 (m, 1H), 4.12 (s, 3H), 3.85–3.79 (m, 1H), 3.74–3.69 (m, 1H), 2.86–2.77 (m, 1H), 2.32–2.24 (m, 1H), 2.04–1.91 (m, 2H), 1.19 (d, *J* = 6.3 Hz, 6H); <sup>13</sup>C NMR (101 MHz, Chloroform-*d*) δ 167.07, 160.57, 153.85, 153.53, 151.90, 119.88, 74.43, 69.74, 68.82, 54.16, 44.62, 29.08, 25.61, 21.67; HRMS (ESI) calcd for C<sub>15</sub>H<sub>21</sub>N<sub>4</sub>O<sub>4</sub>, [M + H]<sup>+</sup>: 321.1563, found: 321.1566.

**ethyl-2-(6-methoxy-8-(tetrahydrofuran-2-yl)-9H-purin-9-yl)acetate (3i)**

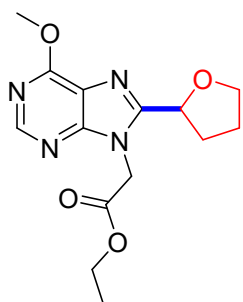

White solid (38.1 mg); 83% yield (eluent: petroleum ether/ethyl acetate = 3:1); mp: 108.1–109.4°C; <sup>1</sup>H NMR (500 MHz, Chloroform-*d*) δ 8.47 (s, 1H), 5.15 (s, 3H), 4.23–4.17 (m, 2H), 4.15 (s, 3H), 3.88–3.83 (m, 1H), 3.78–3.72 (m, 1H), 2.90–2.82 (m, 1H), 2.34–2.27 (m, 1H), 2.06–1.95 (m, 2H), 1.24 (t, *J* = 7.2 Hz, 3H); <sup>13</sup>C NMR (126 MHz, Chloroform-*d*) δ 167.59, 160.63, 153.87, 153.52, 151.96, 119.95, 74.44, 68.87, 61.86, 54.17, 44.43, 29.08, 25.64, 14.09; HRMS (ESI) calcd for C<sub>14</sub>H<sub>19</sub>N<sub>4</sub>O<sub>4</sub>, [M + H]<sup>+</sup>: 307.1406, found: 307.1413.

**9-ethyl-2,6-dimethoxy-8-(tetrahydrofuran-2-yl)-9H-purine (3j)**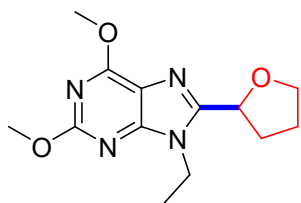

White solid (36.7 mg); 88% yield (eluent: petroleum ether/ethyl acetate = 3:1); mp: 72.0–72.6°C; <sup>1</sup>H NMR (400 MHz, Chloroform-*d*) δ 5.11 (dd, *J* = 7.4, 6.0 Hz, 1H), 4.37–4.25 (m, 2H), 4.13 (s, 3H), 4.01 (s, 3H), 3.93–3.82 (m, 2H), 2.94–2.83 (m, 1H), 2.30–2.11 (m, 2H), 2.05–1.96 (m, 1H), 1.43 (t, *J* = 7.2 Hz, 3H); <sup>13</sup>C NMR (101 MHz, Chloroform-*d*) δ 161.61, 161.44, 155.04, 151.48, 115.85, 73.35, 68.72, 54.94, 54.10, 38.31, 28.71, 26.04, 15.15; HRMS (ESI) calcd for C<sub>13</sub>H<sub>19</sub>N<sub>4</sub>O<sub>3</sub>, [M + H]<sup>+</sup>: 279.1457, found: 279.1462.

**9-benzyl-6-(methylthio)-8-(tetrahydrofuran-2-yl)-9H-purine (3k)**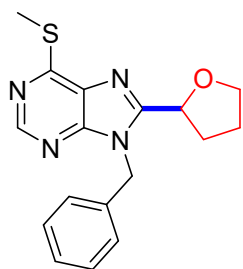

White solid (39.1 mg); 80% yield (eluent: petroleum ether/ethyl acetate = 3:1); mp: 105.9–106.7°C; <sup>1</sup>H NMR (400 MHz, Chloroform-*d*) δ 8.69 (s, 1H), 7.27–7.19 (m, 3H), 7.17–7.11 (m, 2H), 5.68 (d, *J* = 15.6 Hz, 1H), 5.51 (d, *J* = 15.6 Hz, 1H), 4.96 (dd, *J* = 7.4, 6.0 Hz, 1H), 3.89–3.79 (m, 2H), 2.74–2.64 (m, 4H), 2.19–2.00 (m, 2H), 1.96–1.88 (m, 1H); <sup>13</sup>C NMR (101 MHz, Chloroform-*d*) δ 160.75, 154.04, 151.94, 150.31, 136.15, 130.24, 128.80, 127.92, 127.16, 73.94, 68.92, 46.17, 29.03, 25.80, 11.85; HRMS (ESI) calcd for C<sub>17</sub>H<sub>18</sub>N<sub>4</sub>OSNa, [M + Na]<sup>+</sup>: 349.1099, found: 349.1098.

**9-ethyl-6-(methylthio)-8-(tetrahydrofuran-2-yl)-9H-purine (3l)**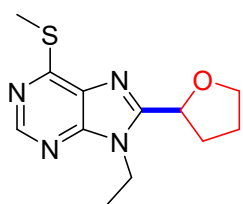

Pale yellow solid (32.1 mg); 81% yield (eluent: petroleum ether/ethyl acetate = 3:1); mp: 86.2–86.9°C; <sup>1</sup>H NMR (400 MHz, Chloroform-*d*) δ 8.71 (s, 1H), 5.20 (dd, *J* = 7.4, 6.2 Hz, 1H), 4.48–4.38 (m, 2H), 3.98–3.91 (m, 2H), 2.90–2.81 (m, 1H), 2.73 (s, 3H), 2.40–2.31 (m, 1H), 2.23–2.16 (m, 1H), 2.12–2.03 (m, 1H), 1.48 (t, *J* = 7.2 Hz, 3H); <sup>13</sup>C NMR (101 MHz, Chloroform-*d*) δ 160.55, 153.60, 151.56, 149.77, 130.50, 73.77, 68.96, 38.52, 29.29, 25.99, 15.33, 11.80; HRMS (ESI) calcd for C<sub>12</sub>H<sub>17</sub>N<sub>4</sub>OS, [M + H]<sup>+</sup>: 265.1123, found: 265.1124.

**6-chloro-7-ethyl-8-(tetrahydrofuran-2-yl)-7H-purine (3m)**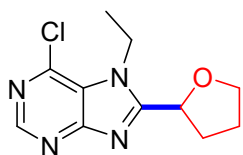

Yellow oily liquid (28.7 mg); 76% yield (eluent: petroleum ether/ethyl acetate = 2:3); <sup>1</sup>H NMR (400 MHz, Chloroform-*d*) δ 8.82 (s, 1H), 5.24 (dd, *J* = 7.6, 5.3 Hz, 1H), 4.76–4.57 (m, 2H), 3.99–3.90 (m, 2H), 3.00–2.90 (m, 1H), 2.42–2.33 (m, 1H), 2.27–2.20 (m, 1H), 2.12–2.04 (m, 1H), 1.54 (t, *J* = 7.2 Hz, 3H); <sup>13</sup>C NMR (101 MHz, Chloroform-*d*) δ 160.65, 160.03, 152.12, 142.15, 123.67, 72.98, 69.28, 41.00, 29.42, 25.92, 17.14; HRMS (ESI) calcd for C<sub>11</sub>H<sub>13</sub>N<sub>4</sub>OCINa, [M + Na]<sup>+</sup>: 275.0676, found: 275.0681.

**7-benzyl-6-chloro-8-(tetrahydrofuran-2-yl)-7H-purine (3n)**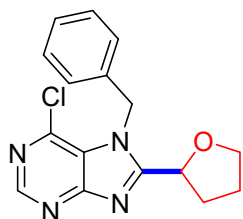

Yellow oily liquid (33.4 mg); 71% yield (eluent: petroleum ether/ethyl acetate = 2:3); <sup>1</sup>H NMR (400 MHz, Chloroform-*d*) δ 8.81 (s, 1H), 7.32–7.24 (m, 3H), 7.00–6.94 (m, 2H), 5.97 (d, *J* = 16.8 Hz, 1H), 5.85 (d, *J* = 16.8 Hz, 1H), 5.07 (dd, *J* = 7.5, 5.2 Hz, 1H), 3.90–3.84 (m, 2H), 2.88–2.79 (m, 1H), 2.26–2.11 (m, 2H), 2.02–1.95 (m, 1H); <sup>13</sup>C NMR (101 MHz, Chloroform-*d*) δ 160.91, 160.56, 152.34, 142.46, 136.03, 129.06, 128.08, 125.84, 124.10, 73.20, 69.33, 48.58, 29.40, 25.81; HRMS (ESI) calcd for C<sub>16</sub>H<sub>16</sub>N<sub>4</sub>OCl, [M + H]<sup>+</sup>: 315.1013, found: 315.1022.

### 2,6-dichloro-7-ethyl-8-(tetrahydrofuran-2-yl)-7H-purine (3o)

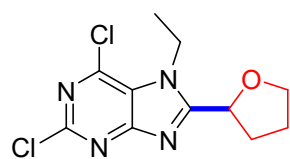

Pale yellow solid (32.2 mg); 75% yield (eluent: petroleum ether/ethyl acetate = 3:1); mp: 66.3–67.4°C;  $^1\text{H}$  NMR (400 MHz, Chloroform-*d*)  $\delta$  5.18 (dd,  $J$  = 7.6, 5.2 Hz, 1H), 4.67–4.49 (m, 2H), 3.92–3.82 (m, 2H), 2.84–2.75 (m, 1H), 2.36–2.27 (m, 1H), 2.18–1.98 (m, 2H), 1.48 (t,  $J$  = 7.2 Hz, 3H);  $^{13}\text{C}$  NMR (101 MHz, Chloroform-*d*)  $\delta$  162.19, 161.70, 152.44, 142.67, 122.79, 72.88, 69.32, 41.24, 29.41, 25.82, 17.04; HRMS (ESI) calcd for  $\text{C}_{11}\text{H}_{13}\text{N}_4\text{OCl}_2$ ,  $[\text{M} + \text{H}]^+$ : 287.0466, found: 287.0469.

### 7-benzyl-2,6-dichloro-8-(tetrahydrofuran-2-yl)-7H-purine (3p)

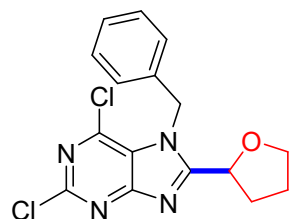

Yellow oily liquid (37.6 mg); 72% yield (eluent: petroleum ether/ethyl acetate = 4:1);  $^1\text{H}$  NMR (400 MHz, Chloroform-*d*)  $\delta$  7.34–7.25 (m, 3H), 7.01–6.95 (m, 2H), 5.90 (q,  $J$  = 16.8 Hz, 2H), 5.10 (dd,  $J$  = 7.6, 5.2 Hz, 1H), 3.88 (td,  $J$  = 6.8, 1.5 Hz, 2H), 2.83–2.73 (m, 1H), 2.30–2.21 (m, 1H), 2.17–2.09 (m, 1H), 2.05–1.95 (m, 1H);  $^{13}\text{C}$  NMR (101 MHz, Chloroform-*d*)  $\delta$  162.55, 162.20, 152.85, 143.11, 135.67, 129.11, 128.19, 125.87, 123.27, 73.11, 69.43, 48.78, 29.51, 25.76; HRMS (ESI) calcd for  $\text{C}_{16}\text{H}_{15}\text{N}_4\text{OCl}_2$ ,  $[\text{M} + \text{H}]^+$ : 349.0623, found: 349.0625.

### 1,3,9-trimethyl-8-(tetrahydrofuran-2-yl)-3,9-dihydro-1H-purine-2,6-dione (3q)

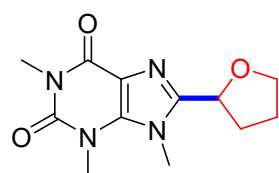

White solid (29.3 mg); 74% yield (eluent: petroleum ether/ethyl acetate = 2:1); mp: 123.8–124.2°C;  $^1\text{H}$  NMR (400 MHz, Chloroform-*d*)  $\delta$  5.01 (t,  $J$  = 6.9 Hz, 1H), 4.02 (s, 3H), 3.97–3.87 (m, 2H), 3.54 (s, 3H), 3.37 (s, 3H), 2.61–2.52 (m, 1H), 2.31–2.22 (m, 1H), 2.19–2.10 (m, 1H), 2.06–2.00 (m, 1H);  $^{13}\text{C}$  NMR (101 MHz, Chloroform-*d*)  $\delta$  155.47, 152.37, 151.69, 147.33, 108.33, 72.61, 68.90, 32.22, 29.69, 29.58, 27.85, 25.93; HRMS (ESI) calcd for  $\text{C}_{12}\text{H}_{17}\text{N}_4\text{O}_3$ ,  $[\text{M} + \text{H}]^+$ : 265.1301, found: 265.1306.

### 1-methyl-2-(tetrahydrofuran-2-yl)-1H-benzo[d]imidazole (3r)

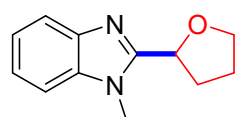

White solid (25.5 mg); 84% yield (eluent: petroleum ether/ethyl acetate = 3:2); mp: 103.5–104.4°C;  $^1\text{H}$  NMR (400 MHz, Chloroform-*d*)  $\delta$  7.77 (dd,  $J$  = 6.4, 1.9 Hz, 1H), 7.34–7.23 (m, 3H), 5.19 (dd,  $J$  = 7.4, 6.3 Hz, 1H), 3.97–3.92 (m, 2H), 3.84 (s, 3H), 2.85–2.76 (m, 1H), 2.39–2.31 (m, 1H), 2.24–2.15 (m, 1H), 2.11–2.01 (m, 1H);  $^{13}\text{C}$  NMR (101 MHz, Chloroform-*d*)  $\delta$  153.60, 141.96, 136.49, 122.69, 121.96, 119.84, 109.18, 73.58, 68.72, 30.21, 29.33, 26.07; HRMS (ESI) calcd for  $\text{C}_{12}\text{H}_{15}\text{N}_2\text{O}$ ,  $[\text{M} + \text{H}]^+$ : 203.1184, found: 203.1190.

### 6-chloro-8-(tetrahydrofuran-2-yl)-9H-purine (4a)

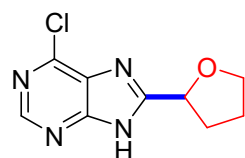

Yellow oily liquid (20.8 mg); 62% yield (eluent: dichloromethane/methanol = 30:1);  $^1\text{H}$  NMR (400 MHz, Chloroform-*d*)  $\delta$  13.63 (s, 1H), 8.81 (s, 1H), 5.32 (dd,  $J$  = 7.9, 5.9 Hz, 1H), 4.14–4.03 (m, 2H), 2.66–2.56 (m, 1H), 2.43–2.33 (m, 1H), 2.15–2.06 (m, 1H), 2.02–1.97 (m, 1H);  $^{13}\text{C}$  NMR (101 MHz, Chloroform-*d*)  $\delta$  160.36, 152.64, 150.86, 150.09, 132.66, 75.43, 69.55, 32.13, 25.85; HRMS (ESI) calcd for  $\text{C}_9\text{H}_{10}\text{N}_4\text{OCl}$ ,  $[\text{M} + \text{H}]^+$ : 225.0543, found: 225.0544.



#### 2,6-dichloro-8-(tetrahydrofuran-2-yl)-9H-purine (4b)

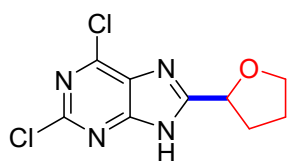

Pale yellow solid (27.1 mg); 70% yield (eluent: petroleum ether/ethyl acetate = 3:1); mp: 134.7–135.1°C; <sup>1</sup>H NMR (400 MHz, Chloroform-*d*) δ 11.99 (s, 1H), 5.28 (dd, *J* = 7.8, 6.0 Hz, 1H), 4.06–3.96 (m, 2H), 2.58–2.50 (m, 1H), 2.45–2.35 (m, 1H), 2.12–2.00 (m, 2H); <sup>13</sup>C NMR (101 MHz, Chloroform-*d*) δ 160.10, 153.99, 152.25, 150.29, 131.01, 75.02, 69.64, 31.83, 25.82; HRMS (ESI) calcd for C<sub>9</sub>H<sub>8</sub>N<sub>4</sub>OCl<sub>2</sub>Na, [M + Na]<sup>+</sup>: 280.9973, found: 280.9978.

#### 6-chloro-2-fluoro-8-(tetrahydrofuran-2-yl)-9H-purine (4c)

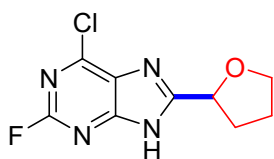

Pale yellow solid (25.1 mg); 69% yield (eluent: petroleum ether/ethyl acetate = 3:1); mp: 138.0–138.6°C; <sup>1</sup>H NMR (400 MHz, Chloroform-*d*) δ 12.50 (s, 1H), 5.25 (t, *J* = 7.1 Hz, 1H), 4.05–3.86 (m, 2H), 2.56–2.45 (m, 1H), 2.39–2.28 (m, 1H), 2.09–1.95 (m, 2H); <sup>13</sup>C NMR (126 MHz, Chloroform-*d*) δ 160.20, 156.80 (d, <sup>1</sup>*J*<sub>C-F</sub> = 219.2 Hz), 154.46 (d, <sup>3</sup>*J*<sub>C-F</sub> = 15.8 Hz), 151.11 (d, <sup>3</sup>*J*<sub>C-F</sub> = 17.2 Hz), 130.57, 75.04, 69.60, 31.95, 25.78; <sup>19</sup>F NMR (376 MHz, Chloroform-*d*) δ -50.57; HRMS (ESI) calcd for C<sub>9</sub>H<sub>8</sub>N<sub>4</sub>OFCINa, [M + Na]<sup>+</sup>: 265.0268, found: 265.0266.

#### 6-methoxy-8-(tetrahydrofuran-2-yl)-9H-purine (4d)

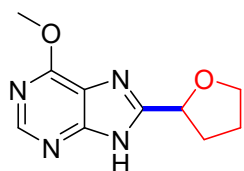

Pale yellow solid (22.1 mg); 67% yield (eluent: dichloromethane/methanol = 30:1); mp: 152.0–153.1°C; <sup>1</sup>H NMR (400 MHz, Chloroform-*d*) δ 14.14 (s, 1H), 8.57 (s, 1H), 5.23 (dd, *J* = 7.7, 5.8 Hz, 1H), 4.14 (s, 3H), 4.07–3.96 (m, 2H), 2.51–2.32 (m, 2H), 2.05–1.90 (m, 2H); <sup>13</sup>C NMR (101 MHz, Chloroform-*d*) δ 160.48, 156.66, 152.97, 150.93, 121.89, 75.47, 69.16, 54.10, 31.79, 25.72; HRMS (ESI) calcd for C<sub>10</sub>H<sub>12</sub>N<sub>4</sub>O<sub>2</sub>Na, [M + Na]<sup>+</sup>: 243.0858, found: 243.0865.

#### 6-(methylthio)-8-(tetrahydrofuran-2-yl)-9H-purine (4e)

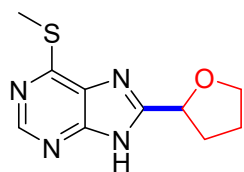

Pale yellow solid (23.4 mg); 66% yield (eluent: petroleum ether/ethyl acetate = 3:2); mp: 192.7–193.1°C; <sup>1</sup>H NMR (400 MHz, Chloroform-*d*) δ 14.17 (s, 1H), 8.76 (s, 1H), 5.28 (dd, *J* = 7.8, 5.9 Hz, 1H), 4.13–4.00 (m, 2H), 2.71 (s, 3H), 2.57–2.48 (m, 1H), 2.38–2.29 (m, 1H), 2.09–1.92 (m, 2H); <sup>13</sup>C NMR (101 MHz, Chloroform-*d*) δ 160.53, 157.57, 150.60, 148.97, 132.21, 75.56, 69.33, 32.26, 25.80, 11.82; HRMS (ESI) calcd for C<sub>10</sub>H<sub>12</sub>N<sub>4</sub>ONaS, [M + Na]<sup>+</sup>: 259.0630, found: 259.0630.

#### 1,3-dimethyl-8-(tetrahydrofuran-2-yl)-3,9-dihydro-1H-purine-2,6-dione (4f)

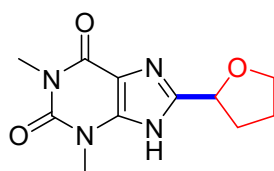

White solid (22.9 mg); 61% yield (eluent: dichloromethane/methanol = 30:1); mp: 239.2–239.5°C; <sup>1</sup>H NMR (400 MHz, Chloroform-*d*) δ 11.73 (s, 1H), 5.11 (dd, *J* = 7.7, 5.7 Hz, 1H), 4.13–4.11 (m, 1H), 3.98–3.91 (m, 1H), 3.59 (s, 3H), 3.45 (s, 3H), 2.50–2.36 (m, 1H), 2.26–2.18 (m, 1H), 2.07–1.96 (m, 2H); <sup>13</sup>C NMR (101 MHz, Chloroform-*d*) δ 155.71, 155.49, 151.78, 149.26, 106.72, 74.94, 69.39, 32.21, 30.24, 28.39, 25.76; HRMS (ESI) calcd for C<sub>11</sub>H<sub>15</sub>N<sub>4</sub>O<sub>3</sub>, [M + H]<sup>+</sup>: 251.1144, found: 251.1147.

#### 8-(tetrahydrofuran-2-yl)-9H-purin-6-amine (4g)

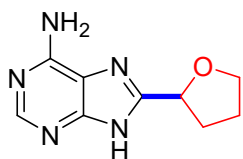

Pale yellow solid (12.6 mg); 41% yield (eluent: dichloromethane/methanol = 25:1); mp: 278.8–280.4°C; <sup>1</sup>H NMR (400 MHz, DMSO-*d*<sub>6</sub>) δ 8.10 (s, 1H), 7.07 (s, 2H), 5.02 (t, *J* = 6.9 Hz, 1H), 4.00–3.94 (m, 1H), 3.86–3.80 (m, 1H), 2.34–2.25 (m, 1H), 2.21–2.12 (m, 1H), 2.02–1.91 (m, 2H); <sup>13</sup>C NMR (101 MHz, DMSO-*d*<sub>6</sub>) δ 152.62, 75.00, 68.70, 31.63, 25.95; HRMS (ESI) calcd for C<sub>9</sub>H<sub>12</sub>N<sub>5</sub>O, [M + H]<sup>+</sup>: 206.1042, found: 206.1044.

#### N-benzyl-8-(tetrahydrofuran-2-yl)-9H-purin-6-amine (4h)

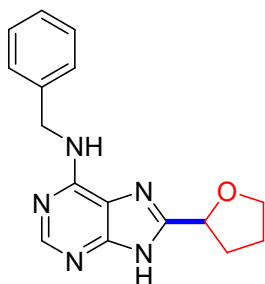

White solid (14.6 mg); 33% yield (eluent: dichloromethane/methanol = 30:1); mp: 166.5–167.3°C; <sup>1</sup>H NMR (500 MHz, DMSO-*d*<sub>6</sub>) δ 12.93 (s, 1H), 8.18 (s, 1H), 7.50–7.24 (m, 5H), 7.21 (t, *J* = 7.3 Hz, 1H), 5.04 (s, 1H), 4.72 (s, 2H), 4.00–3.93 (m, 1H), 3.87–3.80 (m, 1H), 2.33–2.15 (m, 2H), 2.01–1.91 (m, 2H); <sup>13</sup>C NMR (126 MHz, DMSO-*d*<sub>6</sub>) δ 154.42, 152.78, 152.62, 150.94, 140.82, 128.58, 127.67, 126.96, 119.15, 75.00, 68.66, 43.36, 31.49, 26.00; HRMS (ESI) calcd for C<sub>16</sub>H<sub>18</sub>N<sub>5</sub>O, [M + H]<sup>+</sup>: 296.1511, found: 296.1514.

#### 2-(tetrahydrofuran-2-yl)-1H-benzo[d]imidazole (4i)

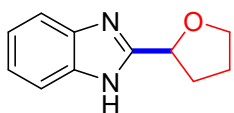

White solid (20.3 mg); 72% yield (eluent: dichloromethane/methanol = 20:1); mp: 208.6–209.1°C; <sup>1</sup>H NMR (400 MHz, Chloroform-*d*) δ 7.59 (s, 2H), 7.28–7.20 (m, 2H), 5.27 (dd, *J* = 7.7, 5.9 Hz, 1H), 4.08–3.94 (m, 2H), 2.55–2.46 (m, 1H), 2.41–2.32 (m, 1H), 2.09–1.94 (m, 2H); <sup>13</sup>C NMR (101 MHz, Chloroform-*d*) δ 156.09, 122.41, 75.36, 69.17, 31.97, 25.82; HRMS (ESI) calcd for C<sub>11</sub>H<sub>13</sub>N<sub>2</sub>O, [M + H]<sup>+</sup>: 189.1028, found: 189.1032.

#### 9-benzyl-6-chloro-8-(tetrahydro-2H-pyran-2-yl)-9H-purine (5a)

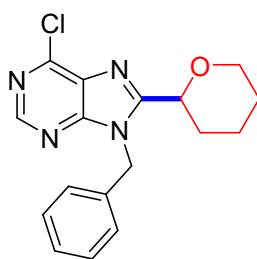

White solid (34.4 mg); 70% yield (eluent: petroleum ether/ethyl acetate = 3:1); mp: 102.7–103.4°C; <sup>1</sup>H NMR (400 MHz, Chloroform-*d*) δ 8.71 (s, 1H), 7.30–7.26 (m, 3H), 7.21–7.15 (m, 2H), 5.73 (d, *J* = 15.3 Hz, 1H), 5.54 (d, *J* = 15.3 Hz, 1H), 4.53 (dd, *J* = 7.6, 5.5 Hz, 1H), 4.07–4.04 (m, 1H), 3.59–3.48 (m, 1H), 2.00–1.92 (m, 2H), 1.70–1.61 (m, 2H), 1.61–1.53 (m, 2H); <sup>13</sup>C NMR (101 MHz, Chloroform-*d*) δ 156.41, 153.66, 151.93, 150.40, 135.71, 130.43, 128.92, 128.26, 127.52, 73.83, 68.92, 47.14, 28.88, 25.49, 22.60; HRMS (ESI) calcd for C<sub>17</sub>H<sub>17</sub>N<sub>4</sub>OClNa, [M + Na]<sup>+</sup>: 351.0989, found: 351.0993.

#### 9-benzyl-6-chloro-8-(1,4-dioxan-2-yl)-9H-purine (5b)

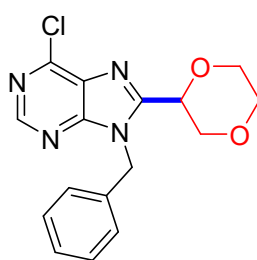

White solid (40.6 mg); 82% yield (eluent: petroleum ether/ethyl acetate = 6:1); mp: 141.3–141.6°C; <sup>1</sup>H NMR (400 MHz, Chloroform-*d*) δ 8.76 (s, 1H), 7.36–7.27 (m, 3H), 7.24–7.16 (m, 2H), 5.77 (d, *J* = 15.3 Hz, 1H), 5.51 (d, *J* = 15.3 Hz, 1H), 4.71 (dd, *J* = 9.6, 3.0 Hz, 1H), 4.15–4.10 (m, 1H), 4.05–3.99 (m, 1H), 3.95–3.90 (m, 1H), 3.87–3.80 (m, 1H), 3.80–3.75 (m, 1H), 3.75–3.68 (m, 1H); <sup>13</sup>C NMR (101 MHz, Chloroform-*d*) δ 153.30, 152.83, 152.20, 150.81, 135.27, 130.36, 129.04, 128.48, 127.46, 70.97, 68.04, 66.90, 66.23, 47.06; HRMS (ESI) calcd for C<sub>16</sub>H<sub>15</sub>N<sub>4</sub>O<sub>2</sub>NaCl, [M + Na]<sup>+</sup>: 353.0781, found: 353.0785.

#### 9-benzyl-6-chloro-8-(5-methyltetrahydrofuran-2-yl)-9H-purine (5c)

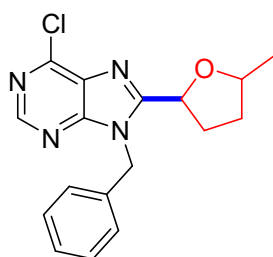

Yellow oily liquid (31.9 mg); 64% yield (eluent: petroleum ether/ethyl acetate = 15:1); a mixture of two diastereomers (dr = 55:45);  $^1\text{H}$  NMR (500 MHz, Chloroform-*d*)  $\delta$  8.74 (d,  $J$  = 1.7 Hz, 1H), 7.33 – 7.26 (m, 3H), 7.26 – 7.20 (m, 2H), 5.80 – 5.72 (m, 1H), 5.68 – 5.58 (m, 1H), 5.16 (t,  $J$  = 6.9 Hz, 1H), 5.00 (dd,  $J$  = 7.7, 5.8 Hz, 1H), 4.23 – 4.16 (m, 0.45H), 4.14 – 4.06 (m, 0.55H), 2.89 – 2.77 (m, 1H), 2.34 – 2.10 (m, 2H), 1.72 – 1.55 (m, 1H), 1.27 (d,  $J$  = 6.1 Hz, 1.6H), 1.24 (d,  $J$  = 6.1 Hz, 1.4H);  $^{13}\text{C}$  NMR (126 MHz, Chloroform-*d*)  $\delta$  157.43, 157.13, 153.85, 151.83, 151.81, 150.26, 150.20, 135.61, 135.59, 130.38, 128.88, 128.84, 128.17, 128.13, 127.35, 127.34, 77.72, 76.34, 74.14, 73.35, 46.80, 46.74, 33.38, 32.82, 29.34, 29.25, 21.01, 20.66; HRMS (ESI) calcd for  $\text{C}_{17}\text{H}_{17}\text{N}_4\text{OClNa}$ ,  $[\text{M} + \text{Na}]^+$ : 351.0989, found: 351.0991.

#### 9-benzyl-6-chloro-8-(2-methyltetrahydrofuran-2-yl)-9H-purine (5c')

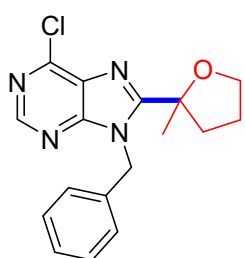

Yellow oily liquid (7.0 mg); 17% yield (eluent: petroleum ether/ethyl acetate = 15:1);  $^1\text{H}$  NMR (500 MHz, Chloroform-*d*)  $\delta$  8.72 (s, 1H), 7.30 – 7.25 (m, 3H), 7.17 – 7.10 (m, 2H), 5.86 – 5.77 (m, 2H), 3.93 – 3.86 (m, 1H), 3.51 – 3.43 (m, 1H), 3.19 – 3.12 (m, 1H), 2.09 – 1.95 (m, 2H), 1.87 – 1.79 (m, 1H), 1.52 (s, 3H);  $^{13}\text{C}$  NMR (126 MHz, Chloroform-*d*)  $\delta$  161.04, 154.33, 151.67, 149.85, 136.59, 130.34, 128.61, 127.71, 126.88, 83.01, 68.94, 48.00, 38.48, 27.45, 25.48; HRMS (ESI) calcd for  $\text{C}_{17}\text{H}_{17}\text{N}_4\text{OClNa}$ ,  $[\text{M} + \text{Na}]^+$ : 351.0989, found: 351.0992.

#### 9-benzyl-6-chloro-8-(1-ethoxyethyl)-9H-purine (5d)

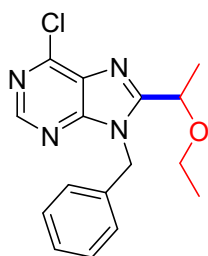

Yellow oily liquid (33.7 mg); 71% yield (eluent: petroleum ether/ethyl acetate = 4:1);  $^1\text{H}$  NMR (400 MHz, Chloroform-*d*)  $\delta$  8.73 (s, 1H), 7.32–7.25 (m, 3H), 7.16–7.10 (m, 2H), 5.78–5.62 (m, 2H), 4.88 (q,  $J$  = 6.9 Hz, 1H), 3.53–3.41 (m, 1H), 3.40–3.31 (m, 1H), 1.53 (d,  $J$  = 6.6 Hz, 3H), 1.09 (t,  $J$  = 6.9 Hz, 3H);  $^{13}\text{C}$  NMR (101 MHz, Chloroform-*d*)  $\delta$  157.82, 153.89, 151.95, 150.20, 135.57, 130.42, 128.86, 128.08, 126.79, 72.62, 64.83, 46.87, 19.06, 15.07; HRMS (ESI) calcd for  $\text{C}_{16}\text{H}_{17}\text{N}_4\text{ONaCl}$ ,  $[\text{M} + \text{Na}]^+$ : 339.0989, found: 339.0992.

#### 9-benzyl-6-chloro-8-((2-methoxyethoxy)methyl)-9H-purine (5e)

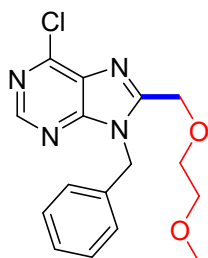

Yellow oily liquid (26.5 mg); 53% yield (eluent: petroleum ether/ethyl acetate = 10:1);  $^1\text{H}$  NMR (500 MHz, Chloroform-*d*)  $\delta$  8.76 (s, 1H), 7.31–7.27 (m, 3H), 7.26–7.23 (m, 2H), 5.63 (s, 2H), 4.75 (s, 2H), 3.67–3.61 (m, 2H), 3.51–3.46 (m, 2H), 3.34 (s, 3H);  $^{13}\text{C}$  NMR (126 MHz, Chloroform-*d*)  $\delta$  153.72, 153.55, 152.17, 150.51, 135.19, 130.45, 128.95, 128.35, 127.56, 71.48, 70.29, 66.39, 59.00, 46.69; HRMS (ESI) calcd for  $\text{C}_{16}\text{H}_{18}\text{N}_4\text{O}_2\text{Cl}$ ,  $[\text{M} + \text{H}]^+$ : 333.1118, found: 333.1119.

**9-benzyl-6-chloro-8-(1,2-dimethoxyethyl)-9H-purine (5e')**

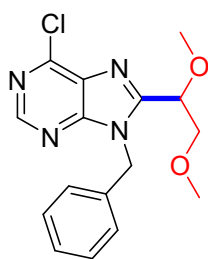

White solid (9.5 mg); 19% yield (eluent: petroleum ether/ethyl acetate = 10:1); mp: 82.9–84.2°C; <sup>1</sup>H NMR (400 MHz, Chloroform-*d*) δ 8.73 (s, 1H), 7.29–7.23 (m, 3H), 7.18–7.11 (m, 2H), 5.72–5.59 (m, 2H), 4.82 (dd, *J* = 6.4, 4.8 Hz, 1H), 3.79–3.66 (m, 2H), 3.26 (s, 3H), 3.15 (s, 3H); <sup>13</sup>C NMR (101 MHz, Chloroform-*d*) δ 155.22, 153.73, 152.05, 150.44, 135.74, 130.65, 128.82, 128.12, 127.07, 77.47, 73.29, 59.30, 57.79, 47.09; HRMS (ESI) calcd for C<sub>16</sub>H<sub>18</sub>N<sub>4</sub>O<sub>2</sub>Cl, [M + H]<sup>+</sup>: 333.1118, found: 333.1124.

**9-benzyl-6-chloro-8-(methoxymethyl)-9H-purine (5e'')**

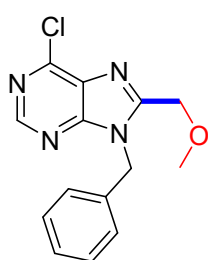

Yellow oily liquid (6.1 mg); 14% yield (eluent: petroleum ether/ethyl acetate = 10:1); <sup>1</sup>H NMR (400 MHz, Chloroform-*d*) δ 8.79 (s, 1H), 7.37–7.30 (m, 3H), 7.29–7.24 (m, 2H), 5.62 (s, 2H), 4.67 (s, 2H), 3.40 (s, 3H); <sup>13</sup>C NMR (101 MHz, Chloroform-*d*) δ 153.66, 153.52, 152.18, 150.54, 135.05, 130.48, 129.00, 128.44, 127.54, 67.63, 58.82, 46.77; HRMS (ESI) calcd for C<sub>14</sub>H<sub>14</sub>N<sub>4</sub>OCl, [M + H]<sup>+</sup>: 289.0856, found: 289.0854.

**9-benzyl-8-(1-butoxybutyl)-6-chloro-9H-purine (5f)**

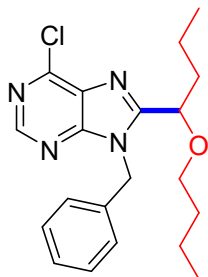

Yellow oily liquid (17.9 mg); 32% yield (eluent: petroleum ether/ethyl acetate = 10:1); <sup>1</sup>H NMR (400 MHz, Chloroform-*d*) δ 8.73 (s, 1H), 7.31–7.26 (m, 3H), 7.12–7.06 (m, 2H), 5.70 (d, *J* = 3.5 Hz, 2H), 4.74 (dd, *J* = 8.5, 6.1 Hz, 1H), 3.28 (q, *J* = 6.2 Hz, 2H), 1.86–1.77 (m, 1H), 1.43–1.35 (m, 2H), 1.29–1.22 (m, 4H), 0.84 (t, *J* = 7.3 Hz, 3H), 0.79 (t, *J* = 7.3 Hz, 3H); <sup>13</sup>C NMR (101 MHz, Chloroform-*d*) δ 157.79, 154.00, 151.90, 150.11, 135.74, 130.54, 128.81, 128.01, 126.64, 77.55, 69.90, 46.87, 35.87, 31.55, 19.21, 18.95, 13.80, 13.55; HRMS (ESI) calcd for C<sub>20</sub>H<sub>25</sub>N<sub>4</sub>OClNa, [M + Na]<sup>+</sup>: 395.1615, found: 395.1608.

## X. NMR Spectra for all the compounds

**3a** [ $^1\text{H}$  NMR (400 MHz,  $\text{CDCl}_3$ ),  $^{13}\text{C}\{^1\text{H}\}$  NMR (101 MHz,  $\text{CDCl}_3$ )]

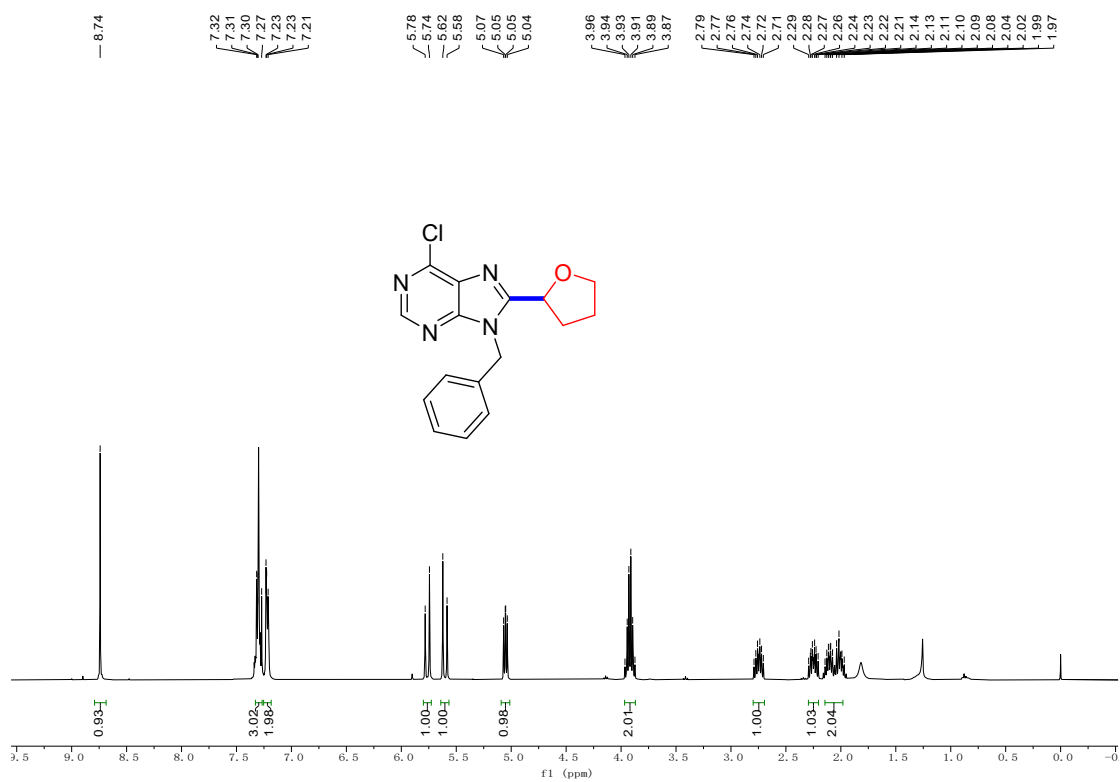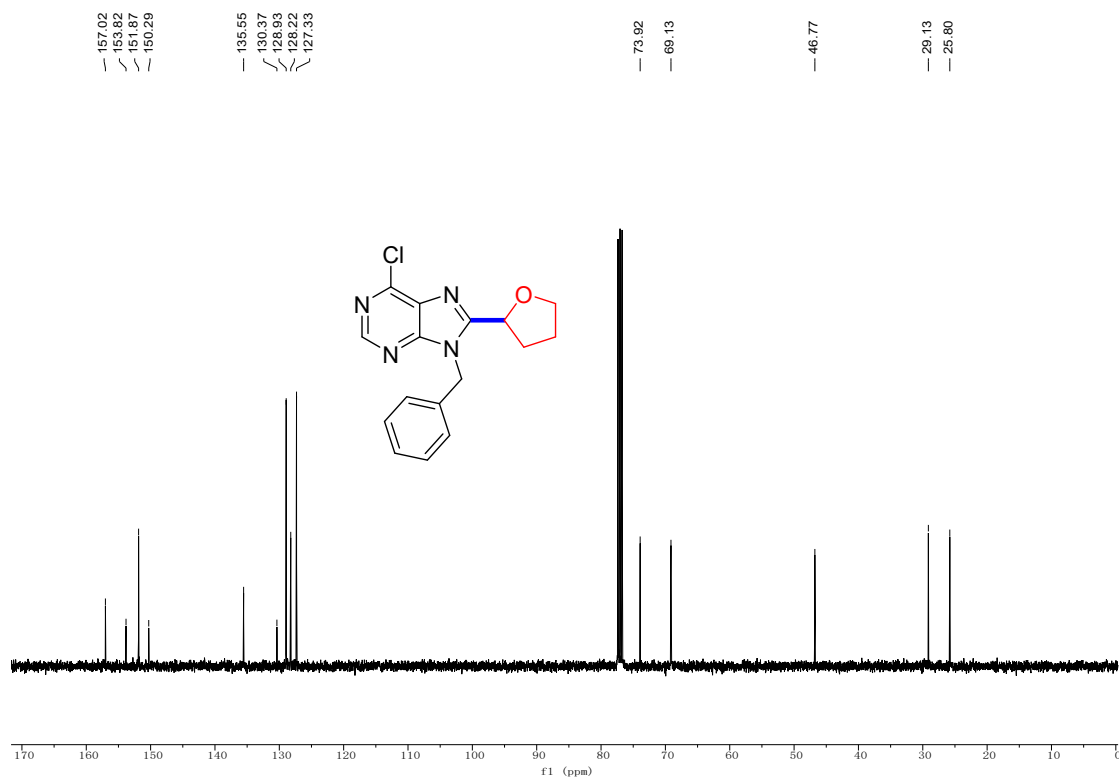

**3b** [ $^1\text{H}$  NMR (400 MHz,  $\text{CDCl}_3$ ),  $^{13}\text{C}\{^1\text{H}\}$  NMR (101 MHz,  $\text{CDCl}_3$ )]

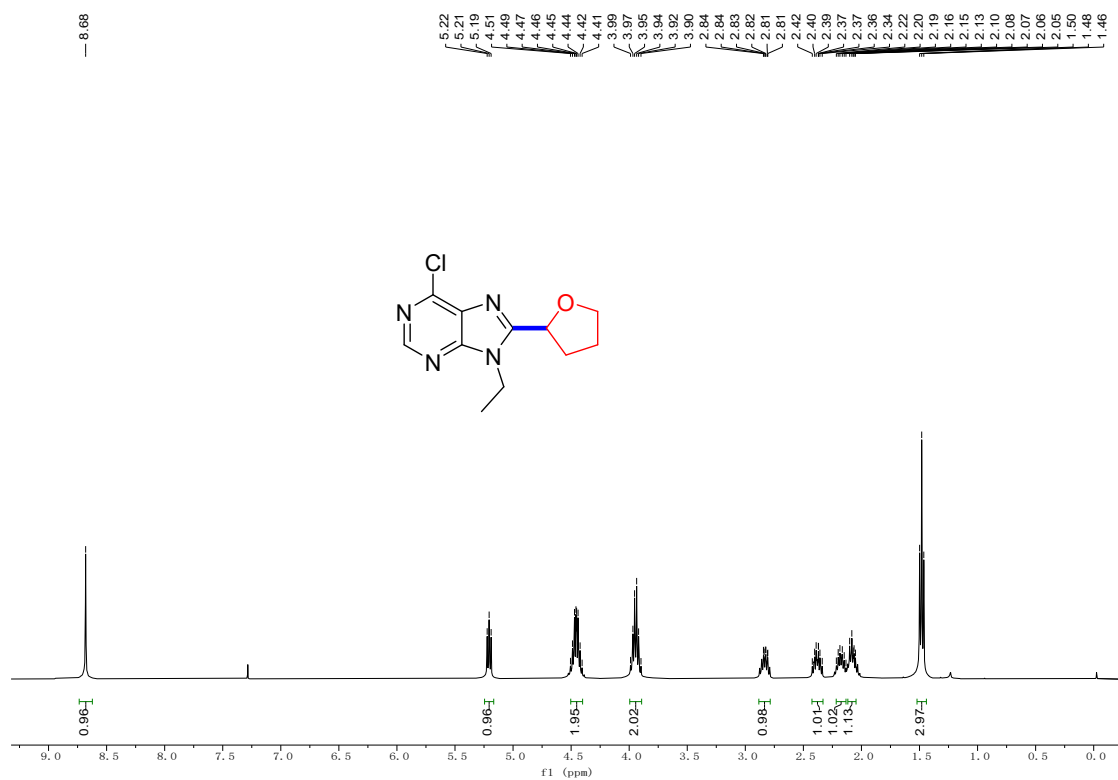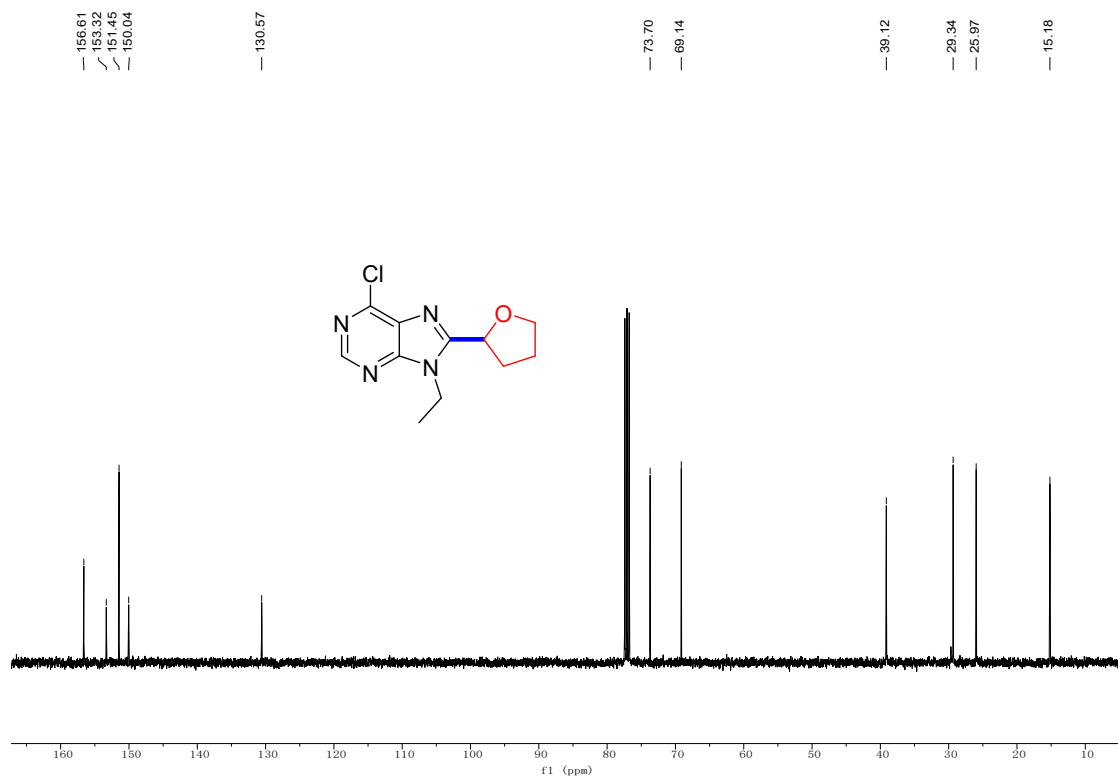

**3c** [ $^1\text{H}$  NMR (400 MHz,  $\text{CDCl}_3$ ),  $^{13}\text{C}$  NMR (101 MHz,  $\text{CDCl}_3$ )]

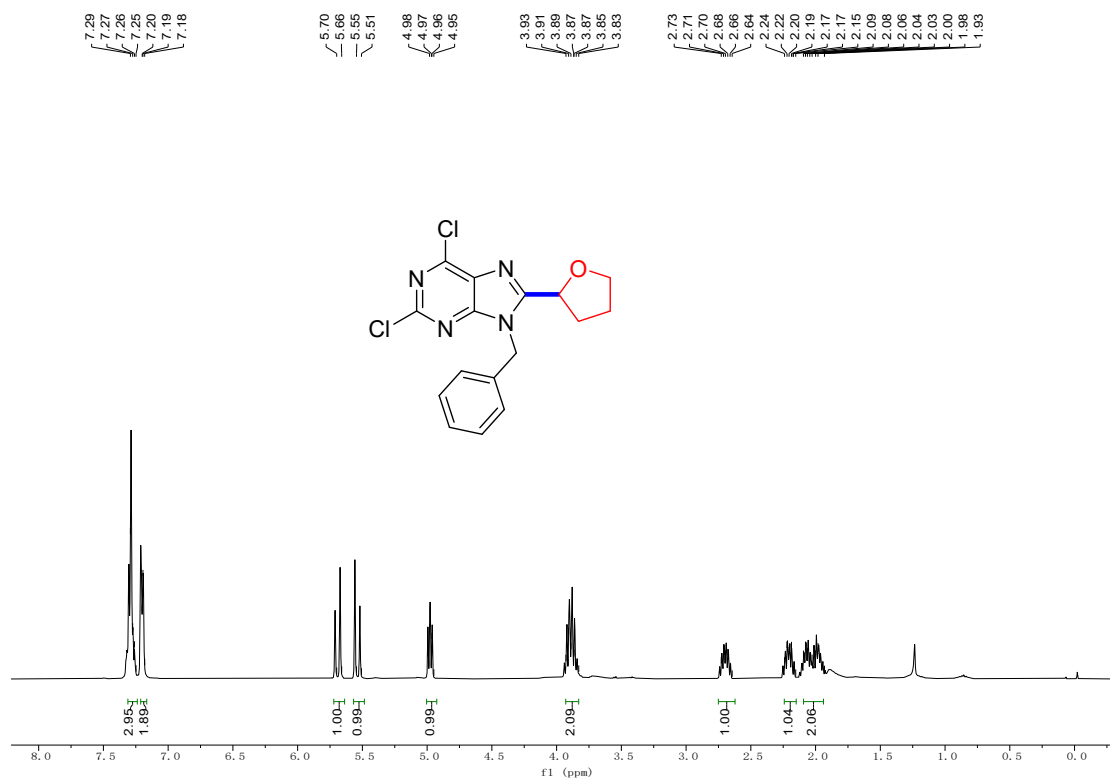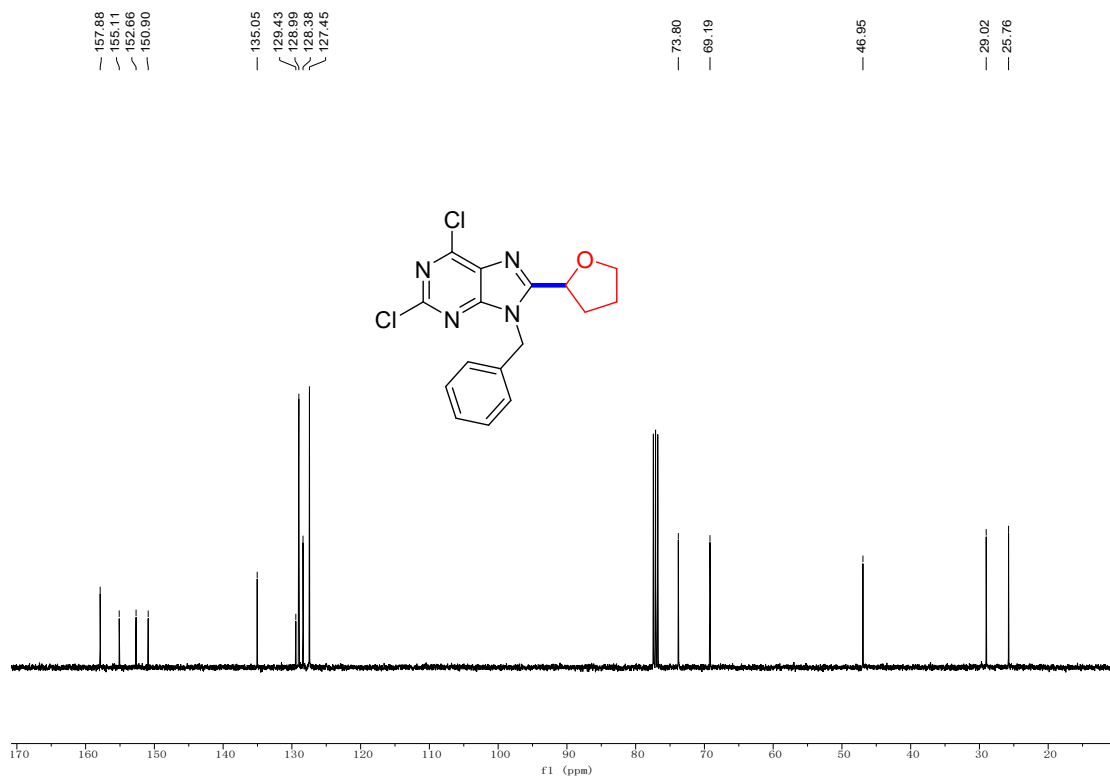

**3d** [ $^1\text{H}$  NMR (400 MHz,  $\text{CDCl}_3$ ),  $^{13}\text{C}$ { $^1\text{H}$ } NMR (101 MHz,  $\text{CDCl}_3$ )]

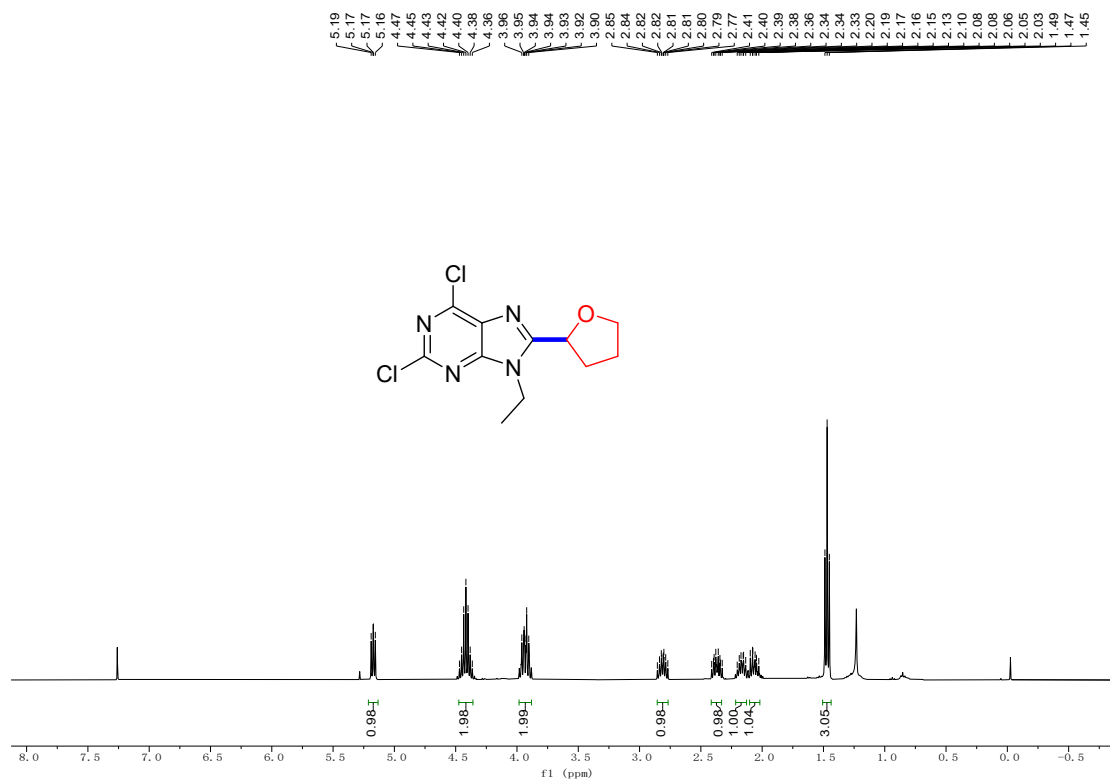

157.47  
154.69  
152.31  
150.72

129.68

73.64  
69.21

39.34

29.28  
25.83

15.15

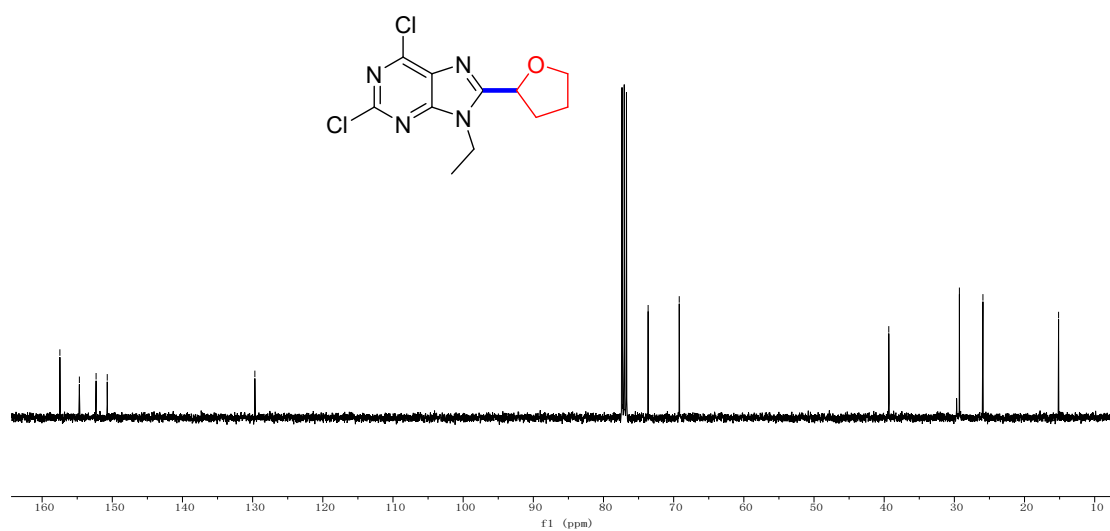



**3e** [ $^1\text{H}$  NMR (500 MHz,  $\text{CDCl}_3$ ),  $^{13}\text{C}$ { $^1\text{H}$ } NMR (126 MHz,  $\text{CDCl}_3$ )]

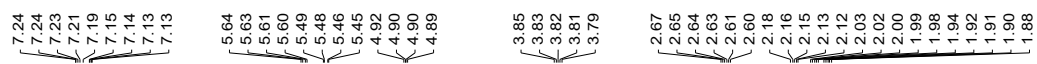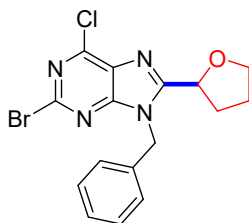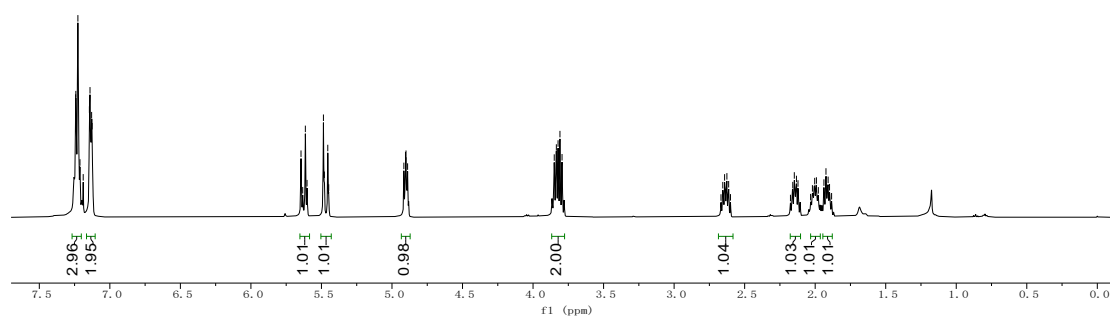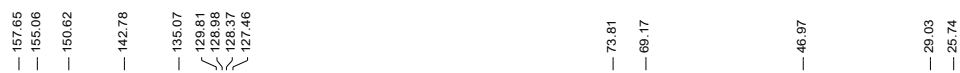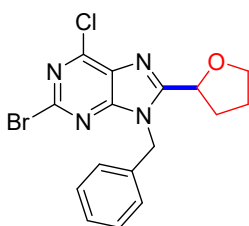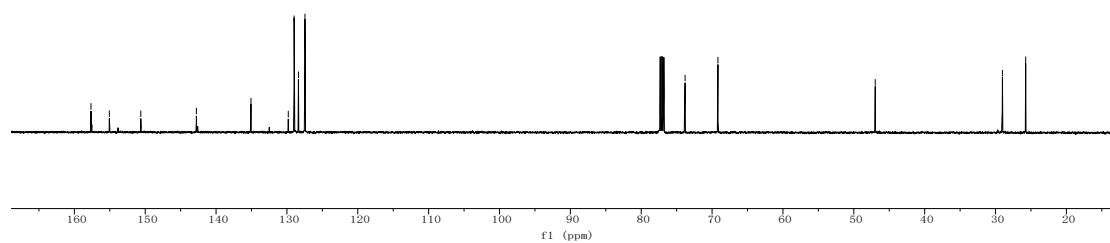

**3f** [<sup>1</sup>H NMR (400 MHz, CDCl<sub>3</sub>), <sup>13</sup>C{<sup>1</sup>H} NMR (101 MHz, CDCl<sub>3</sub>)]

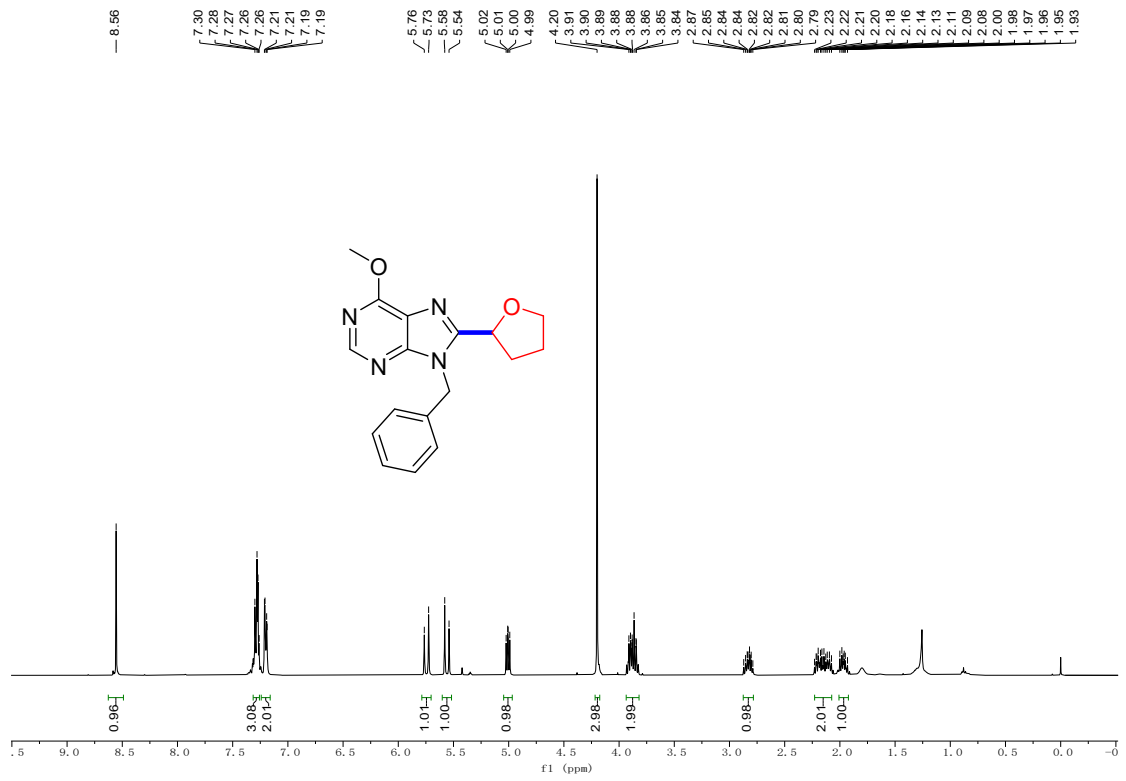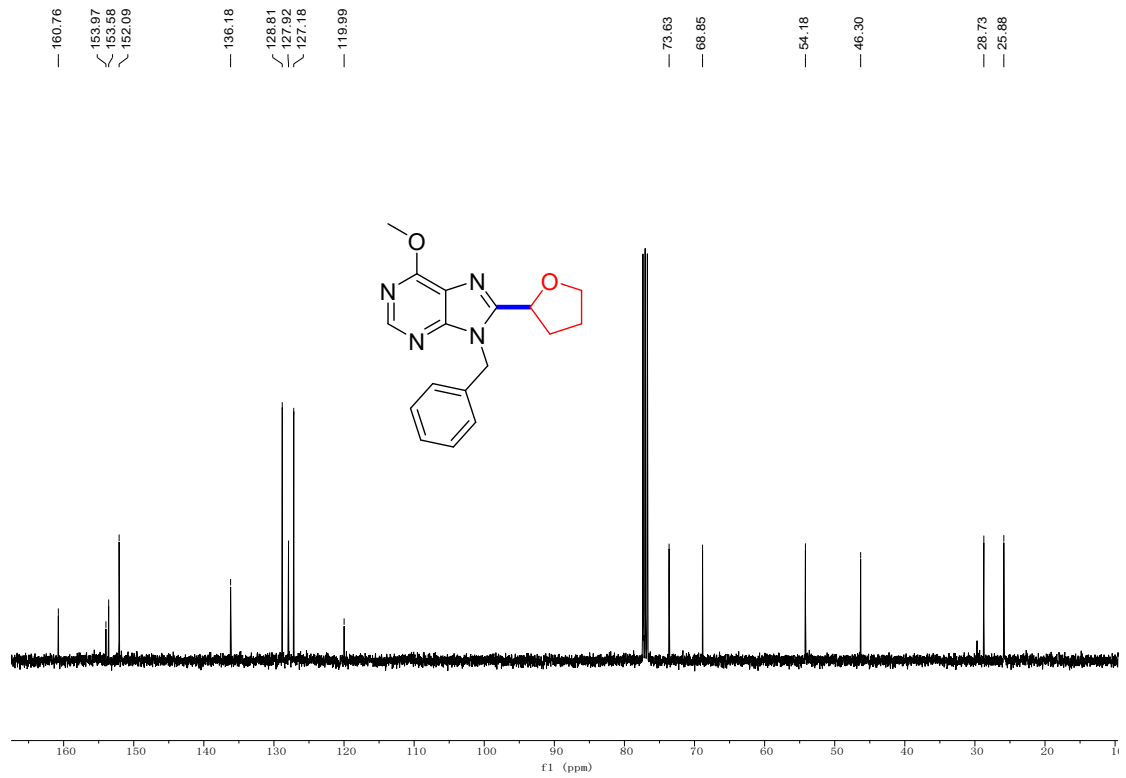

**3g** [ $^1\text{H}$  NMR (400 MHz,  $\text{CDCl}_3$ ),  $^{13}\text{C}$ { $^1\text{H}$ } NMR (101 MHz,  $\text{CDCl}_3$ )]

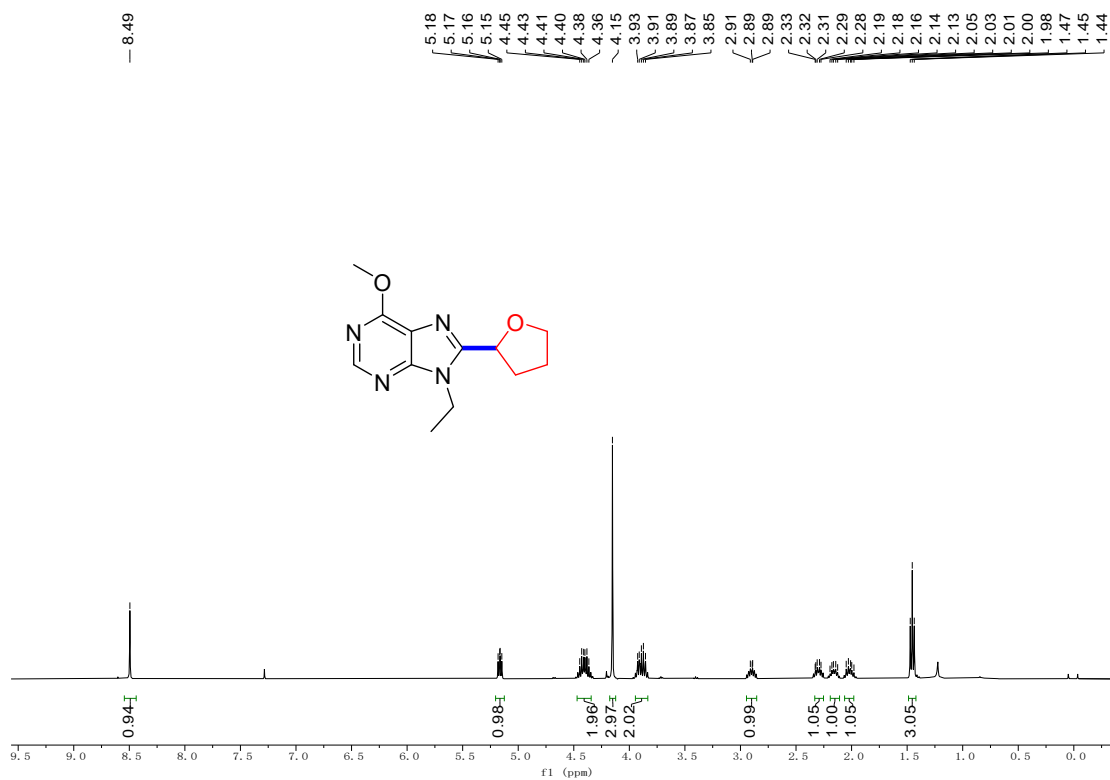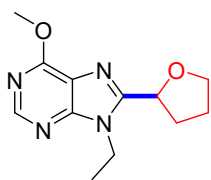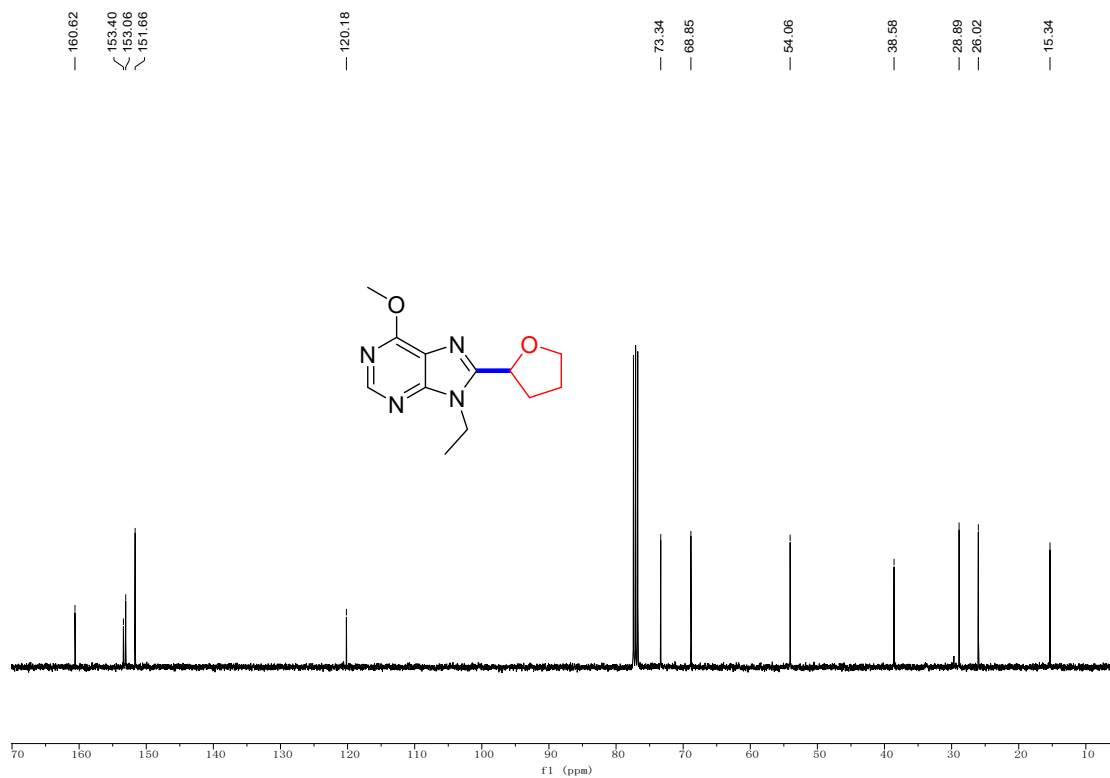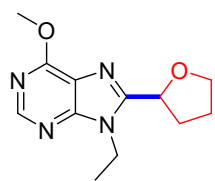

**3h** [ $^1\text{H}$  NMR (400 MHz,  $\text{CDCl}_3$ ),  $^{13}\text{C}$ { $^1\text{H}$ } NMR (101 MHz,  $\text{CDCl}_3$ )]

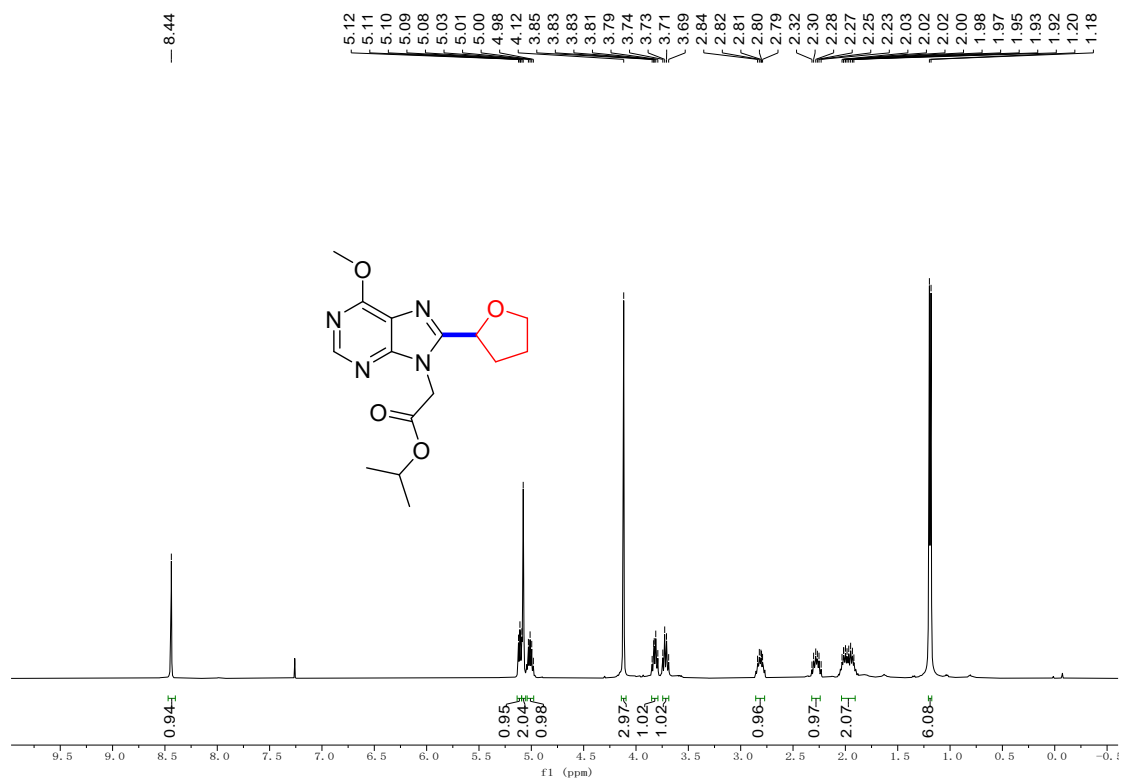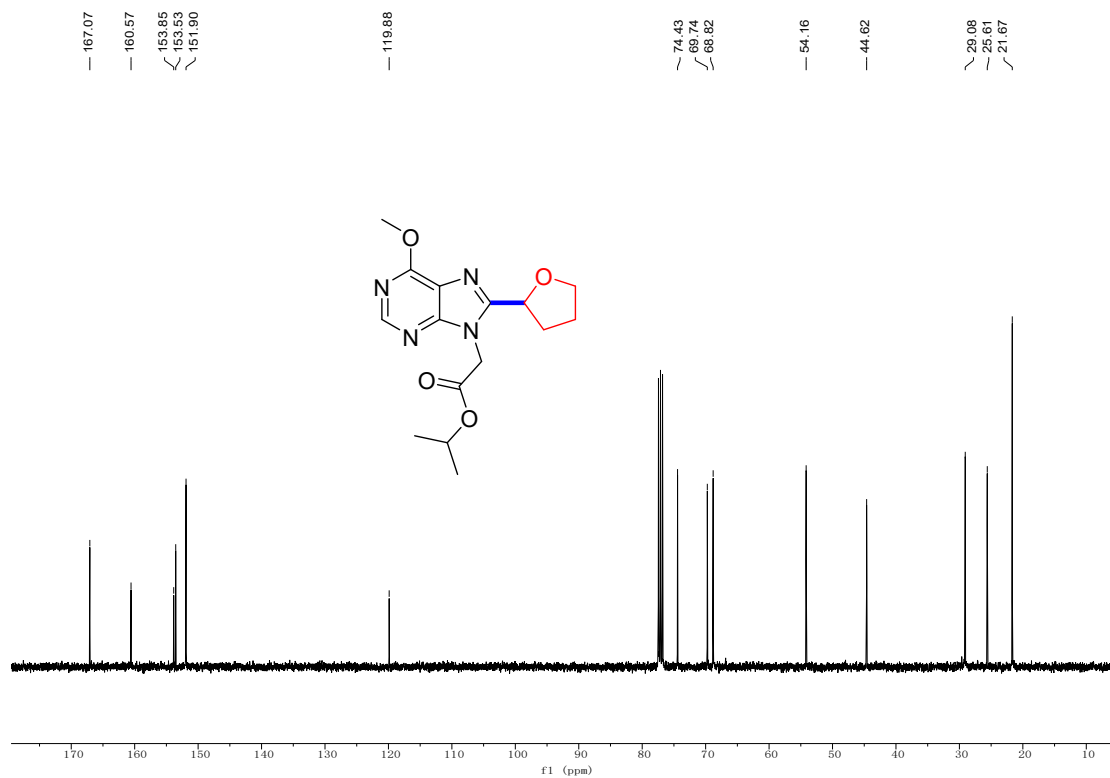

**3i** [ $^1\text{H}$  NMR (500 MHz,  $\text{CDCl}_3$ ),  $^{13}\text{C}\{^1\text{H}\}$  NMR (126 MHz,  $\text{CDCl}_3$ )]

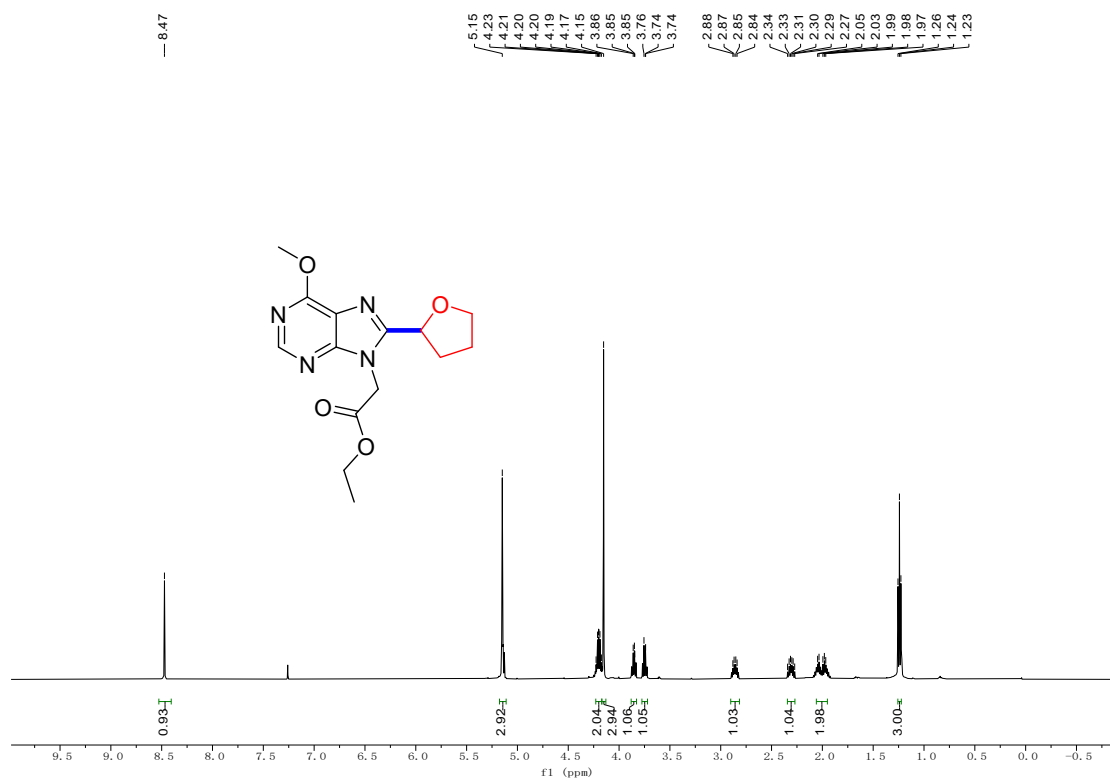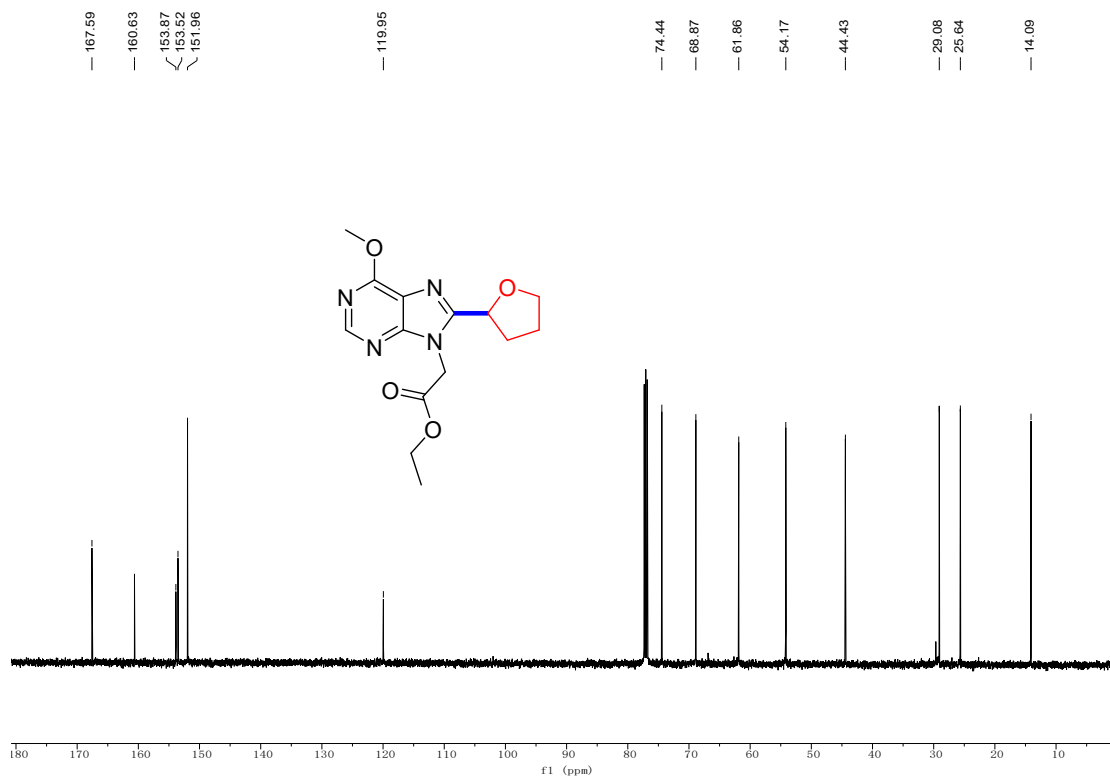

**3j** [ $^1\text{H}$  NMR (400 MHz,  $\text{CDCl}_3$ ),  $^{13}\text{C}\{^1\text{H}\}$  NMR (101 MHz,  $\text{CDCl}_3$ )]

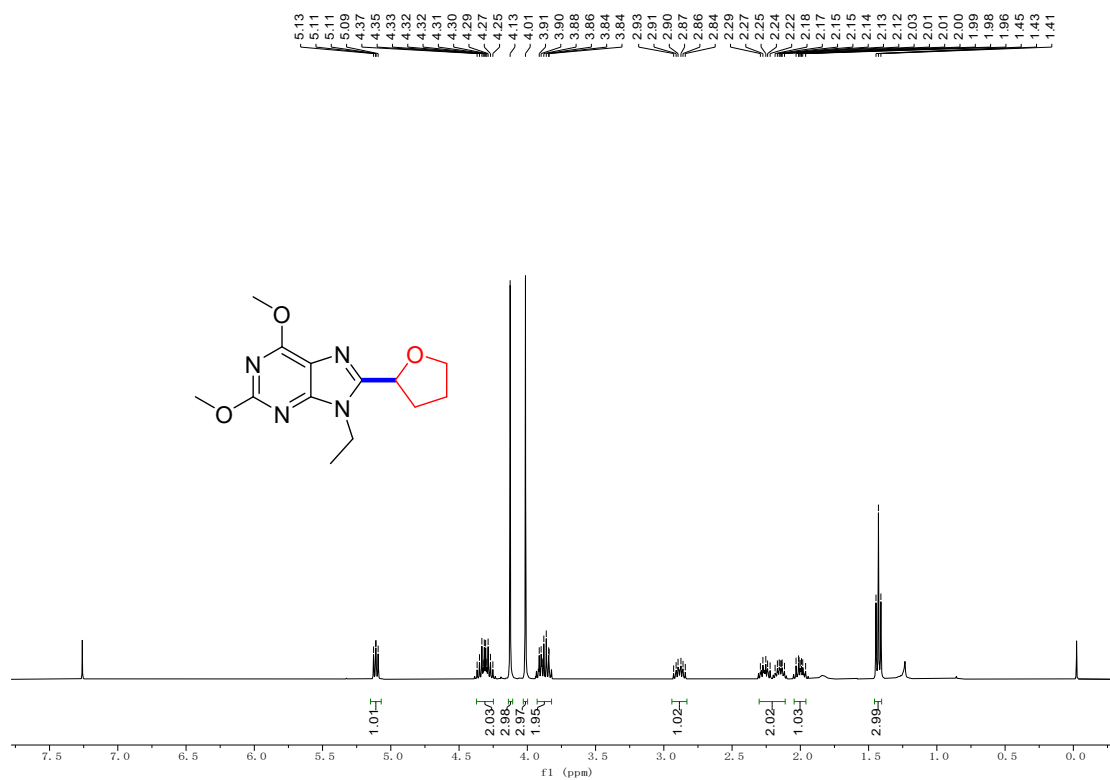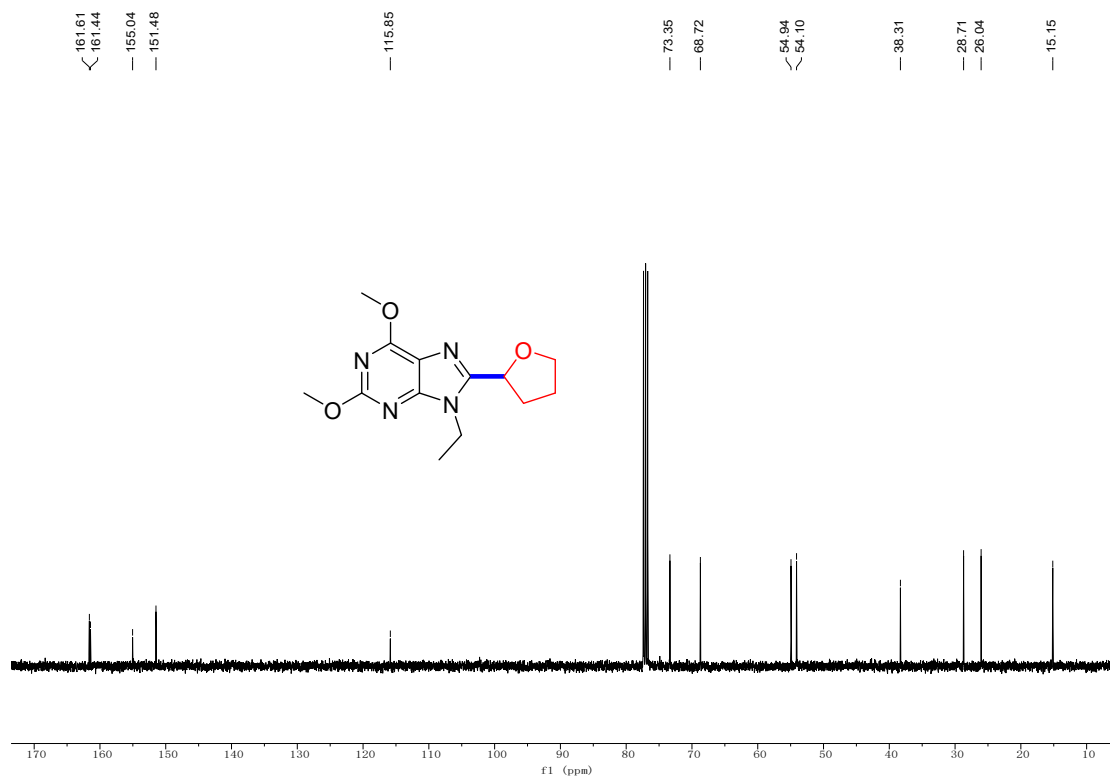

**3k** [ $^1\text{H}$  NMR (400 MHz,  $\text{CDCl}_3$ ),  $^{13}\text{C}\{^1\text{H}\}$  NMR (101 MHz,  $\text{CDCl}_3$ )]

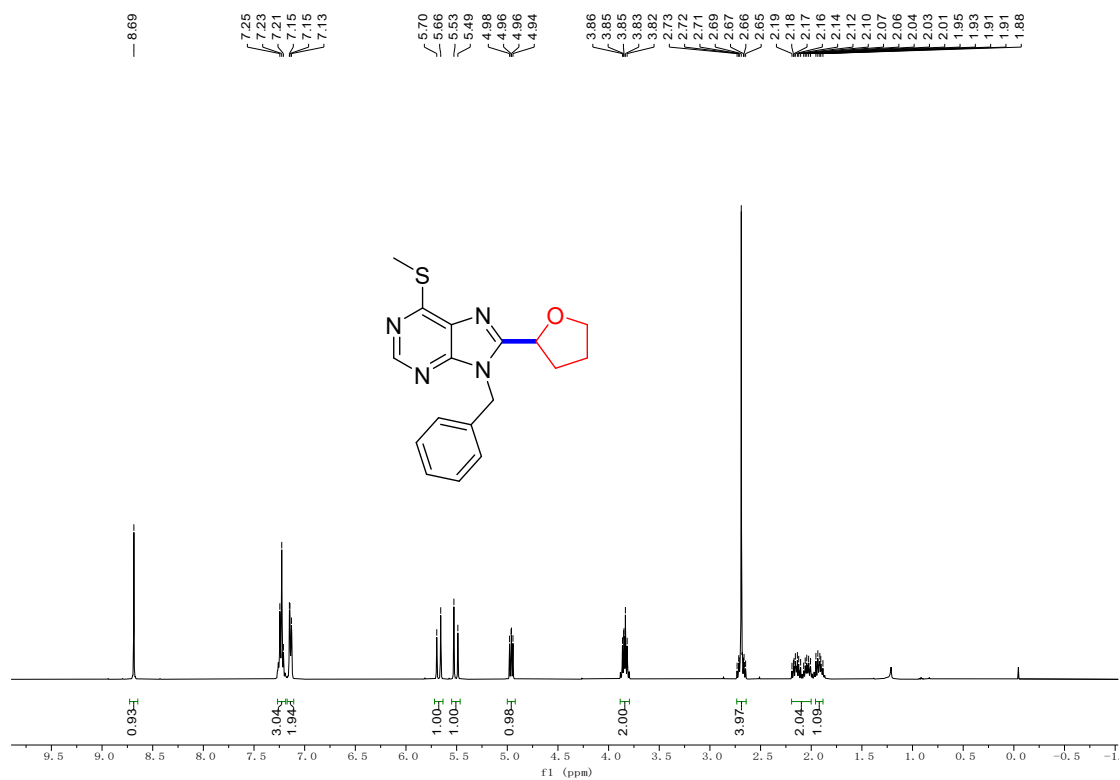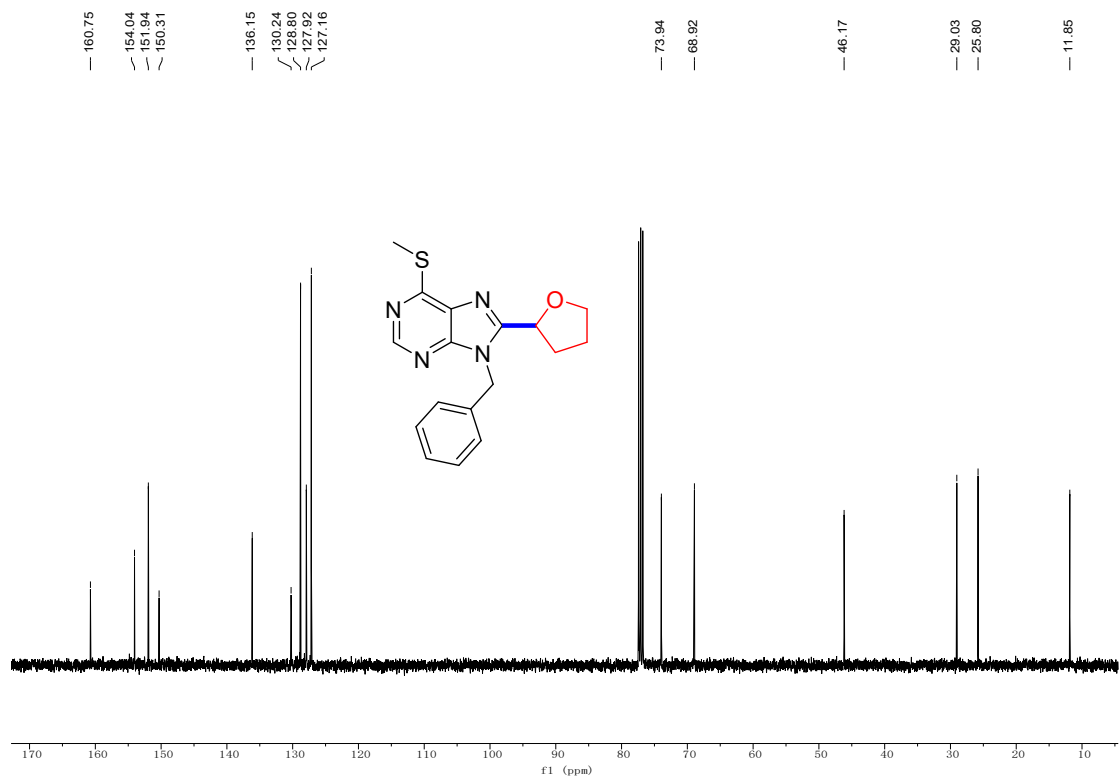

**3I** [ $^1\text{H}$  NMR (400 MHz,  $\text{CDCl}_3$ ),  $^{13}\text{C}\{^1\text{H}\}$  NMR (101 MHz,  $\text{CDCl}_3$ )]

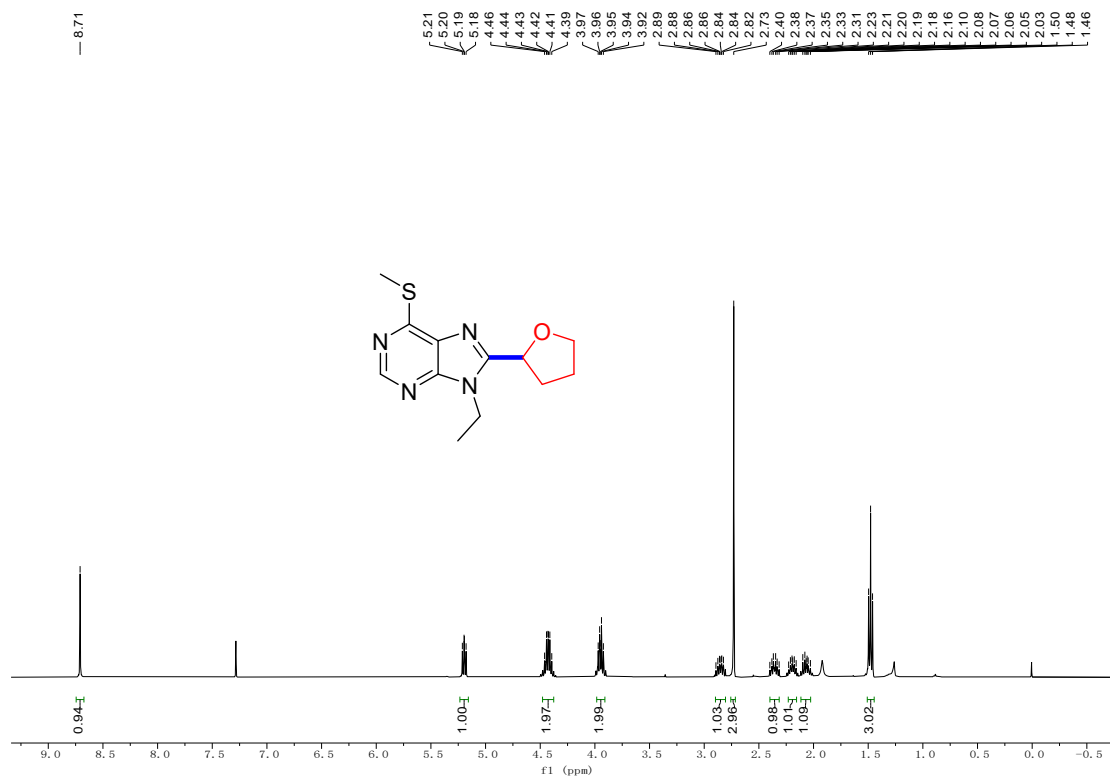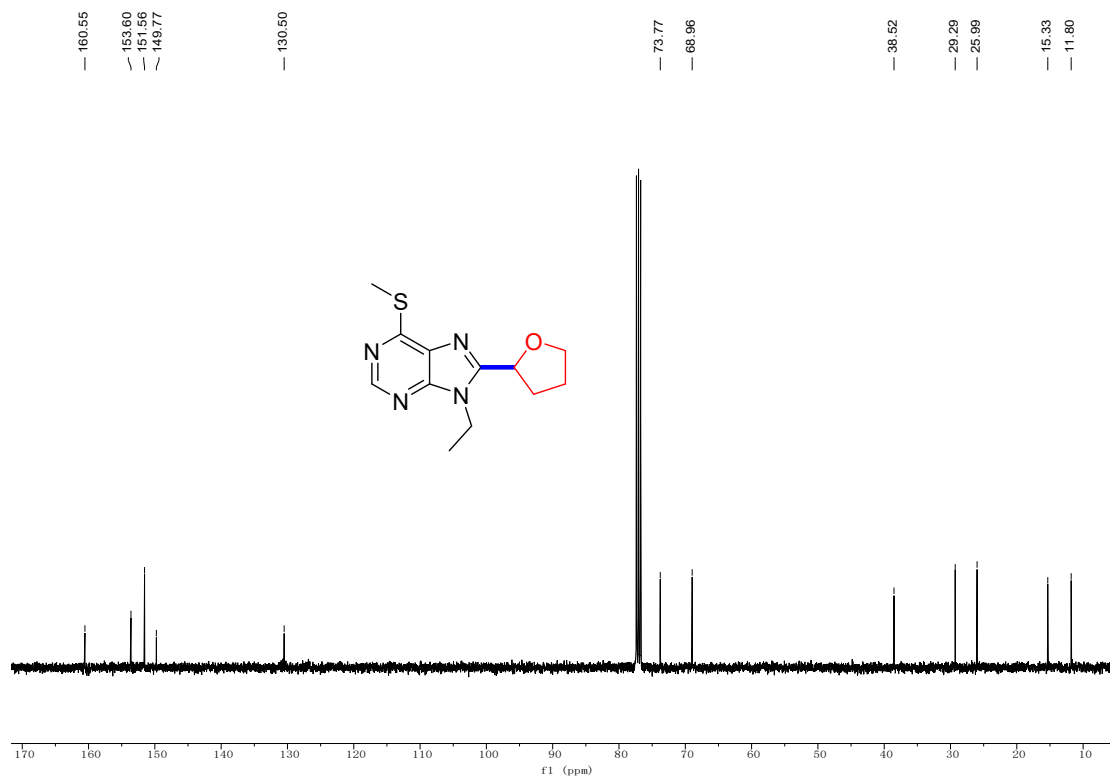



**3m** [ $^1\text{H}$  NMR (400 MHz,  $\text{CDCl}_3$ ),  $^{13}\text{C}\{^1\text{H}\}$  NMR (101 MHz,  $\text{CDCl}_3$ )]

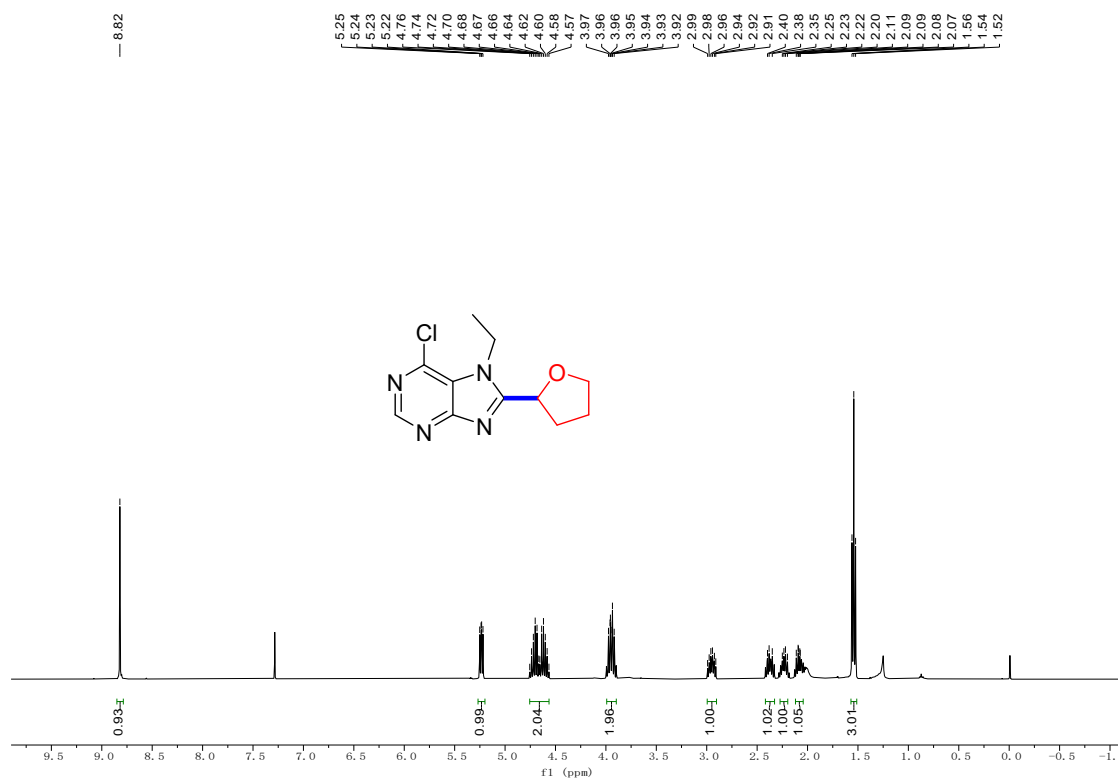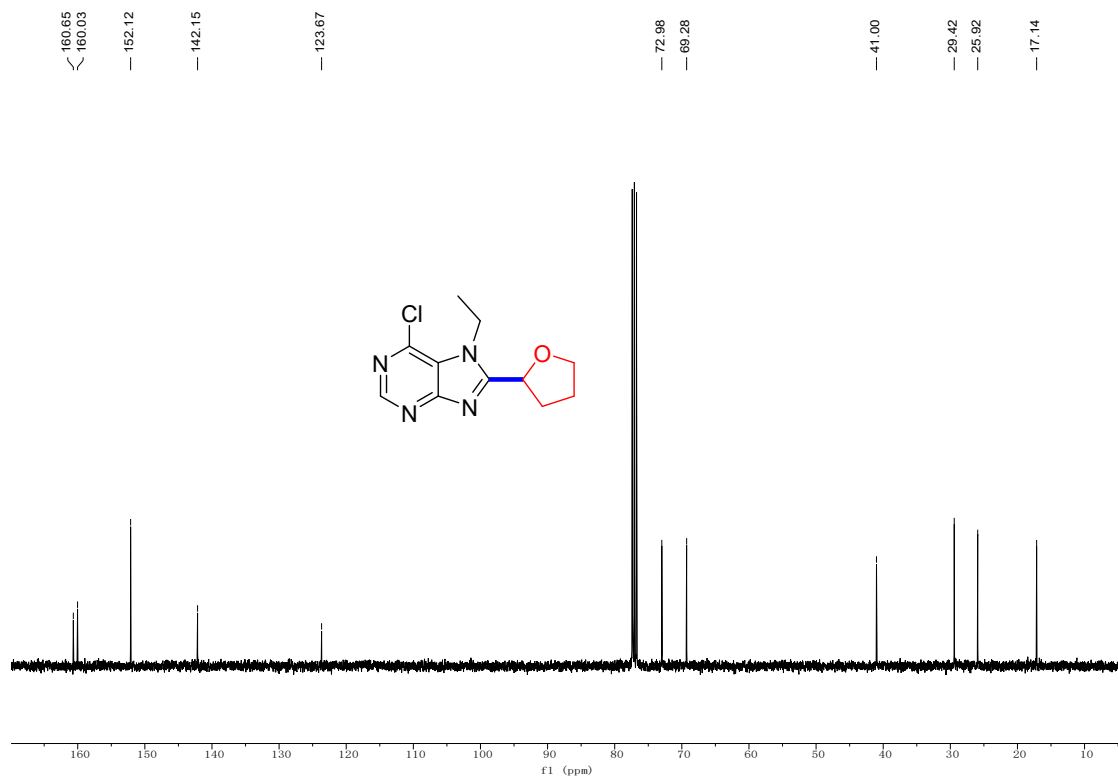

**3n** [ $^1\text{H}$  NMR (400 MHz,  $\text{CDCl}_3$ ),  $^{13}\text{C}$ { $^1\text{H}$ } NMR (101 MHz,  $\text{CDCl}_3$ )]

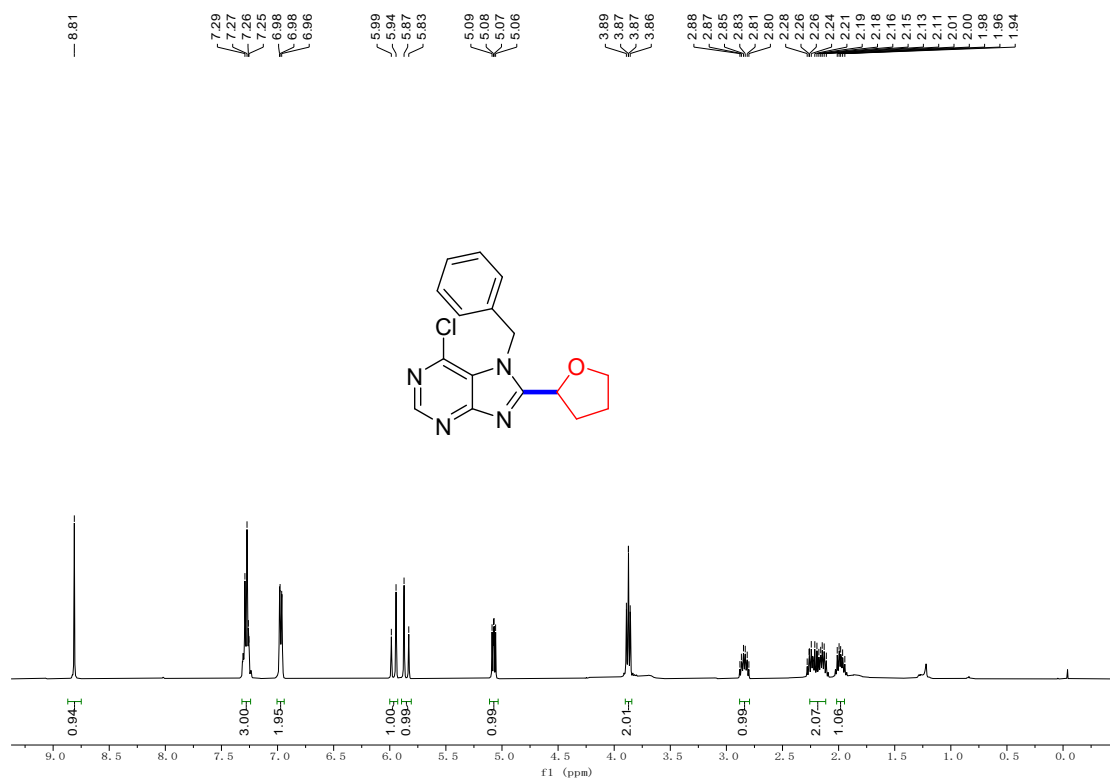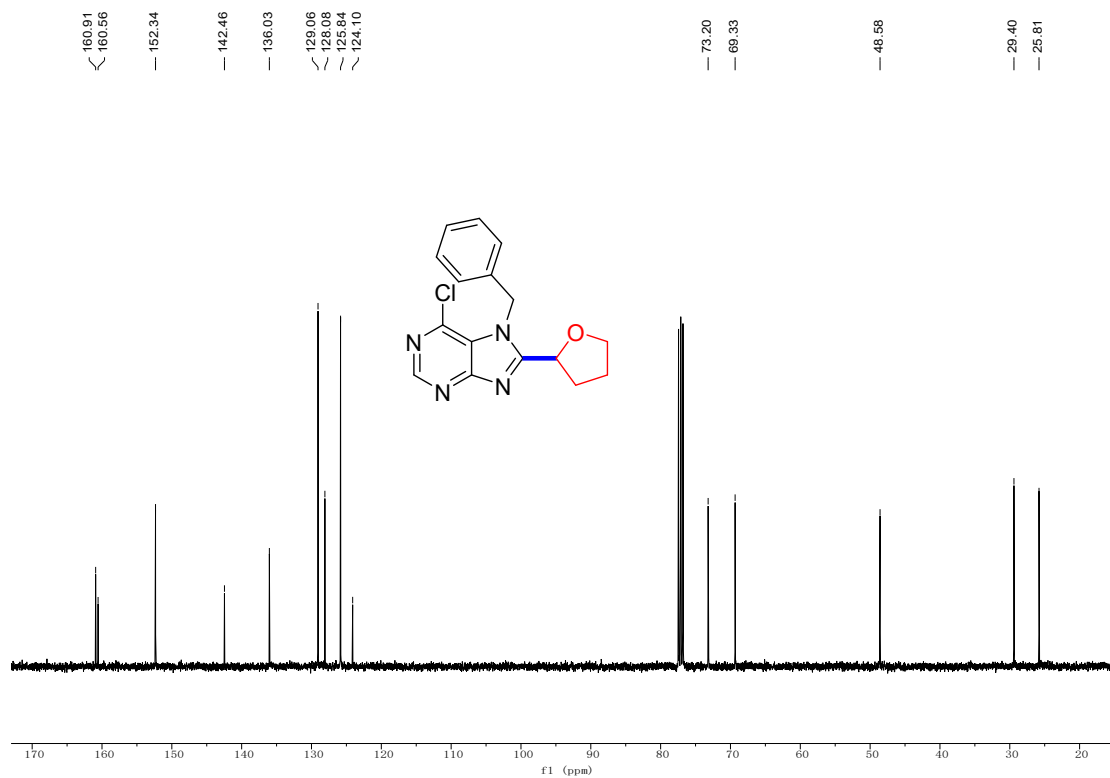

**3o** [ $^1\text{H}$  NMR (400 MHz,  $\text{CDCl}_3$ ),  $^{13}\text{C}\{^1\text{H}\}$  NMR (101 MHz,  $\text{CDCl}_3$ )]

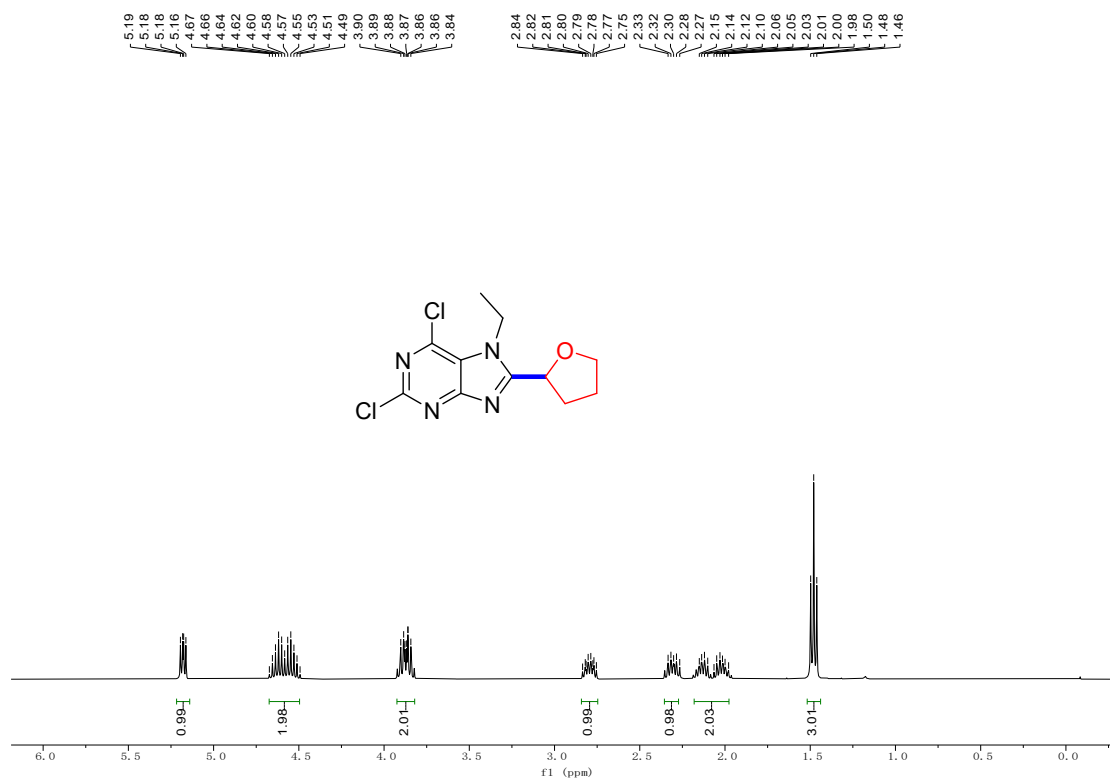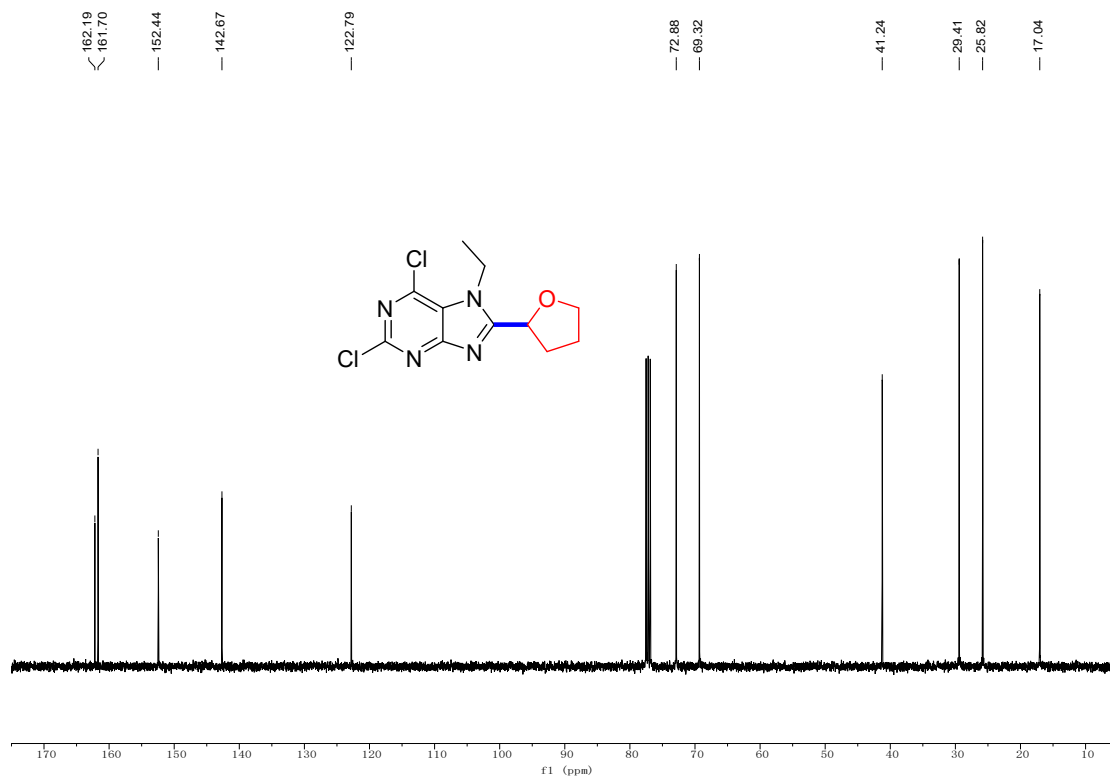

**3p** [ $^1\text{H}$  NMR (400 MHz,  $\text{CDCl}_3$ ),  $^{13}\text{C}$ { $^1\text{H}$ } NMR (101 MHz,  $\text{CDCl}_3$ )]

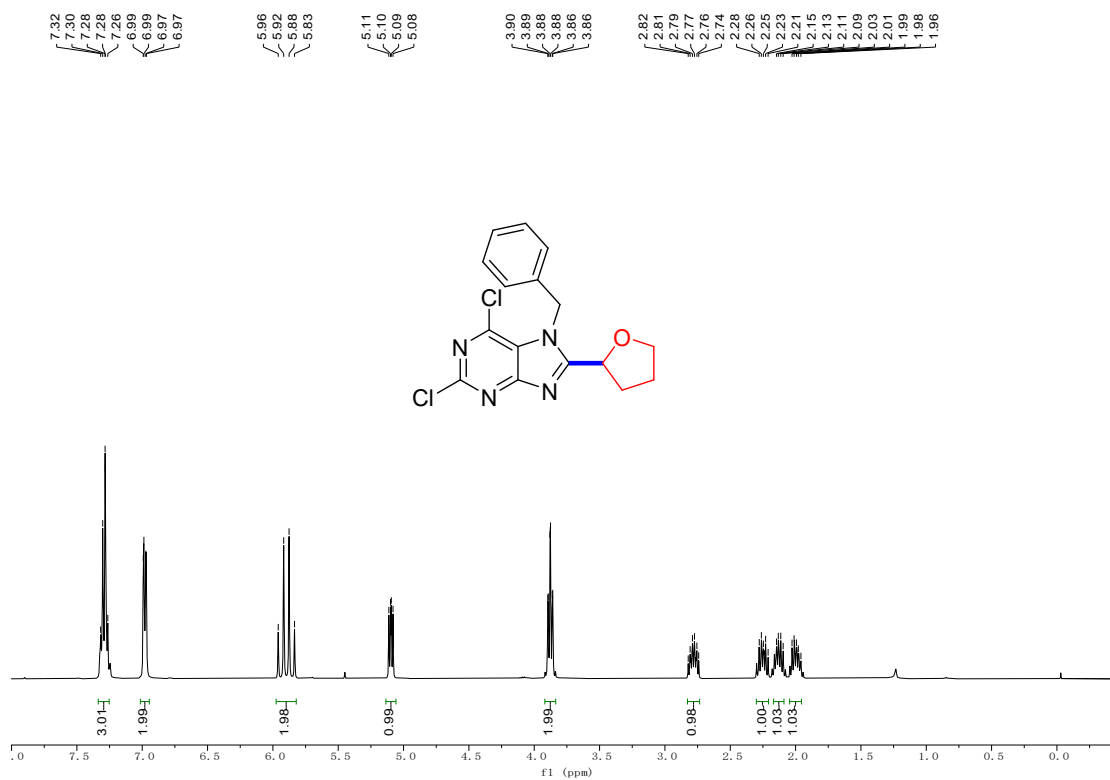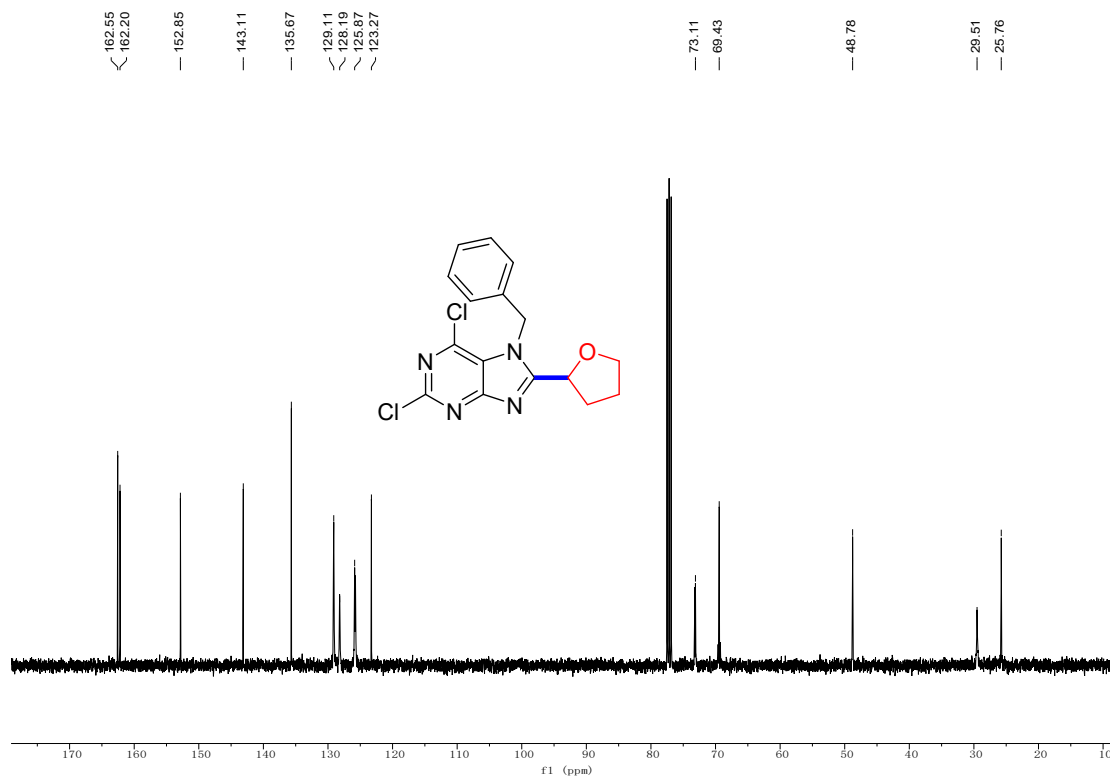

**3q** [ $^1\text{H}$  NMR (400 MHz,  $\text{CDCl}_3$ ),  $^{13}\text{C}\{^1\text{H}\}$  NMR (101 MHz,  $\text{CDCl}_3$ )]

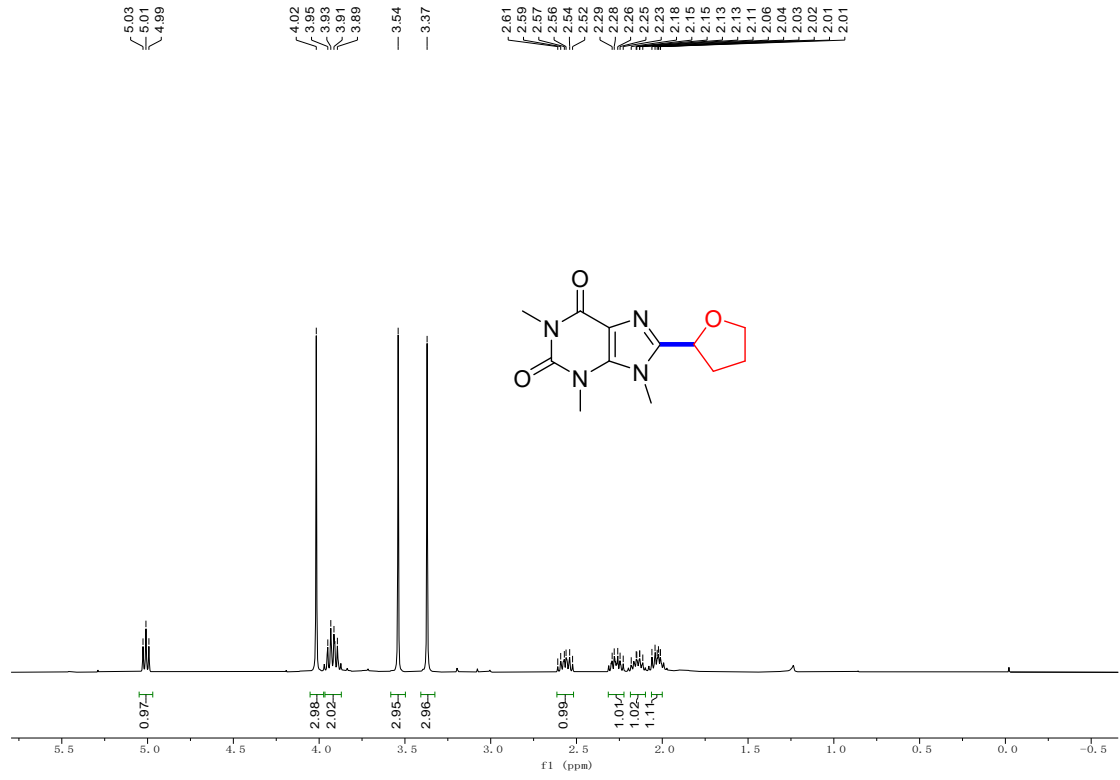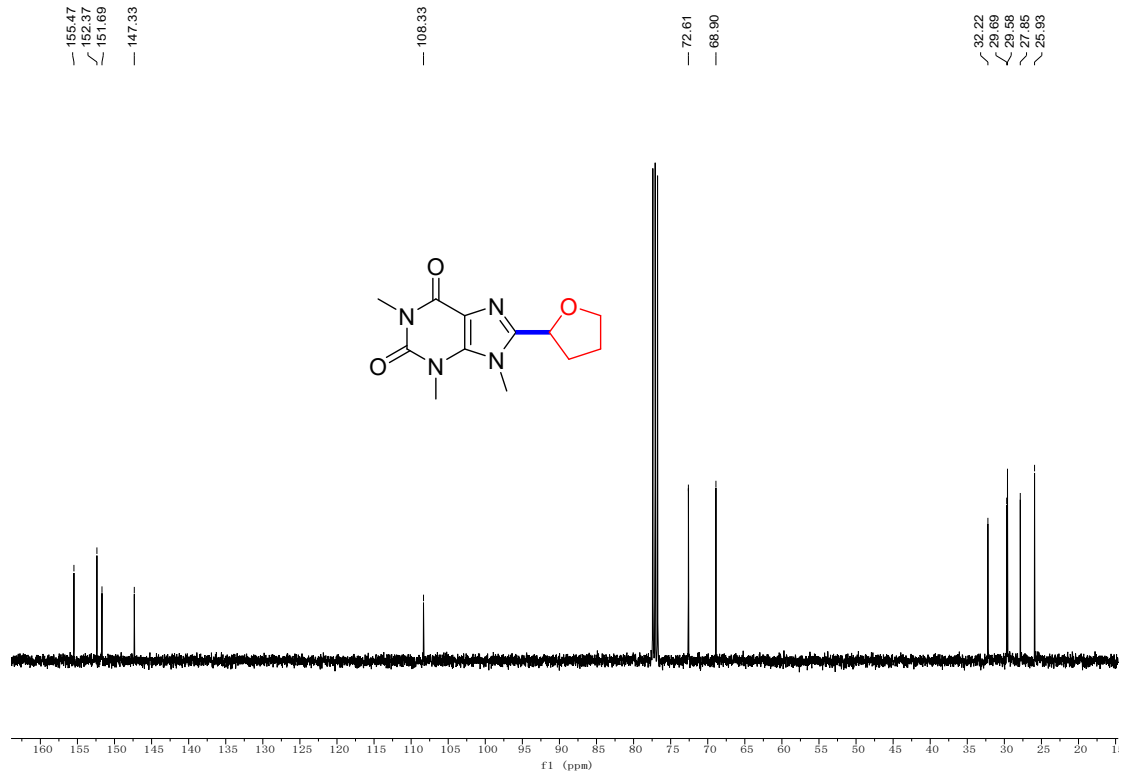

**3r** [ $^1\text{H}$  NMR (400 MHz,  $\text{CDCl}_3$ ),  $^{13}\text{C}$ { $^1\text{H}$ } NMR (101 MHz,  $\text{CDCl}_3$ )]

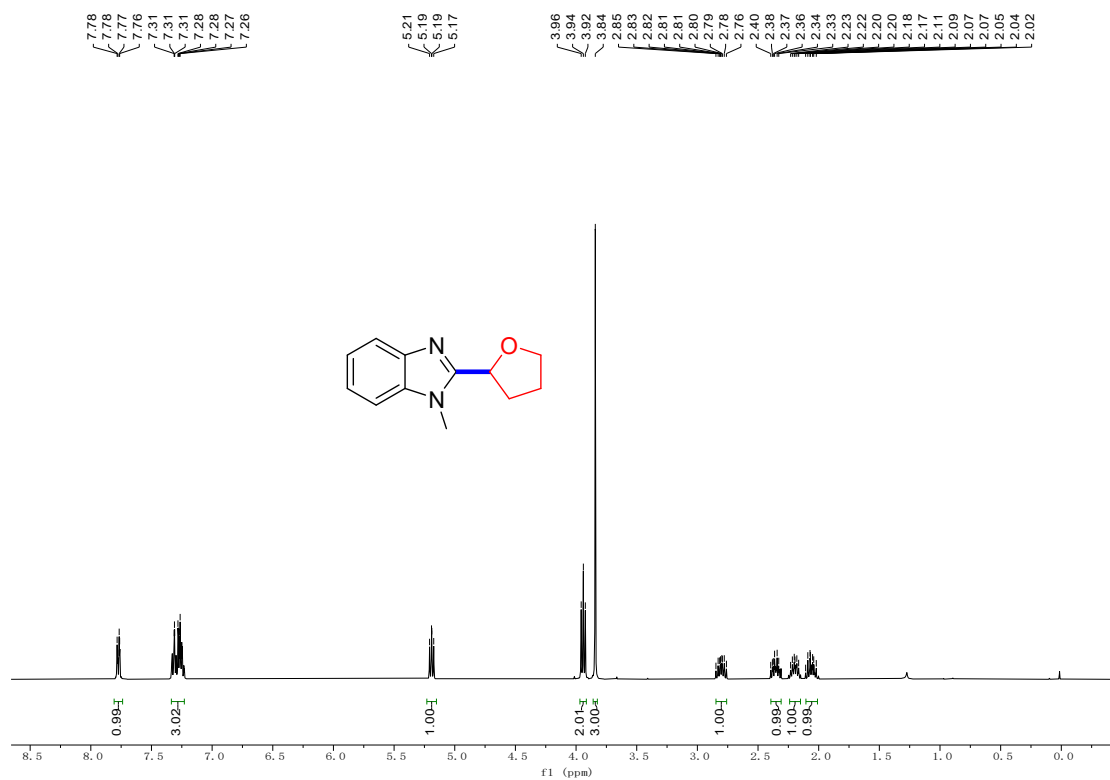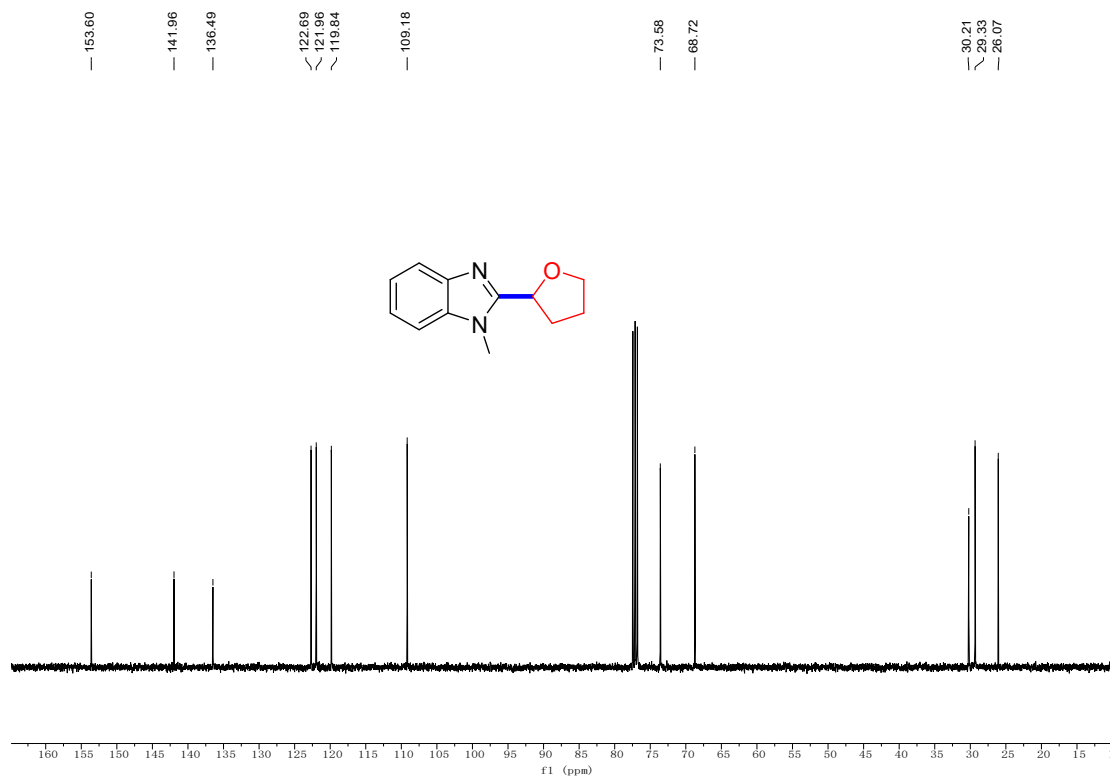

4a [<sup>1</sup>H NMR (400 MHz, CDCl<sub>3</sub>), <sup>13</sup>C{<sup>1</sup>H} NMR (101 MHz, CDCl<sub>3</sub>)]

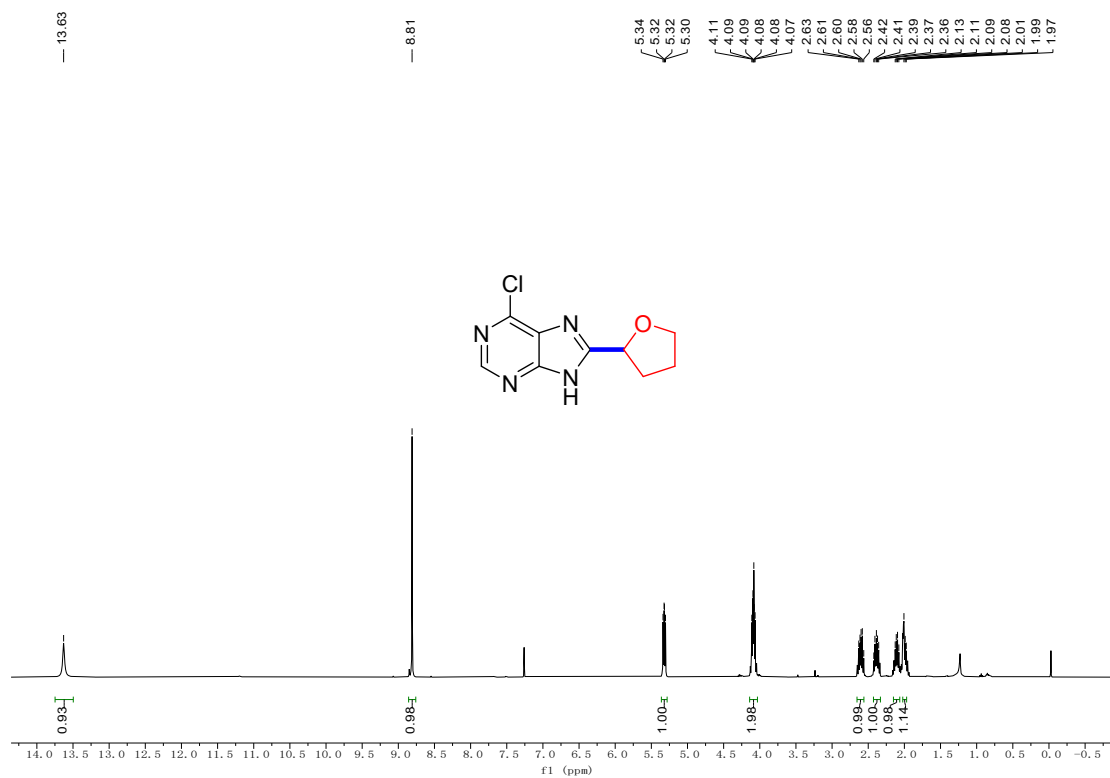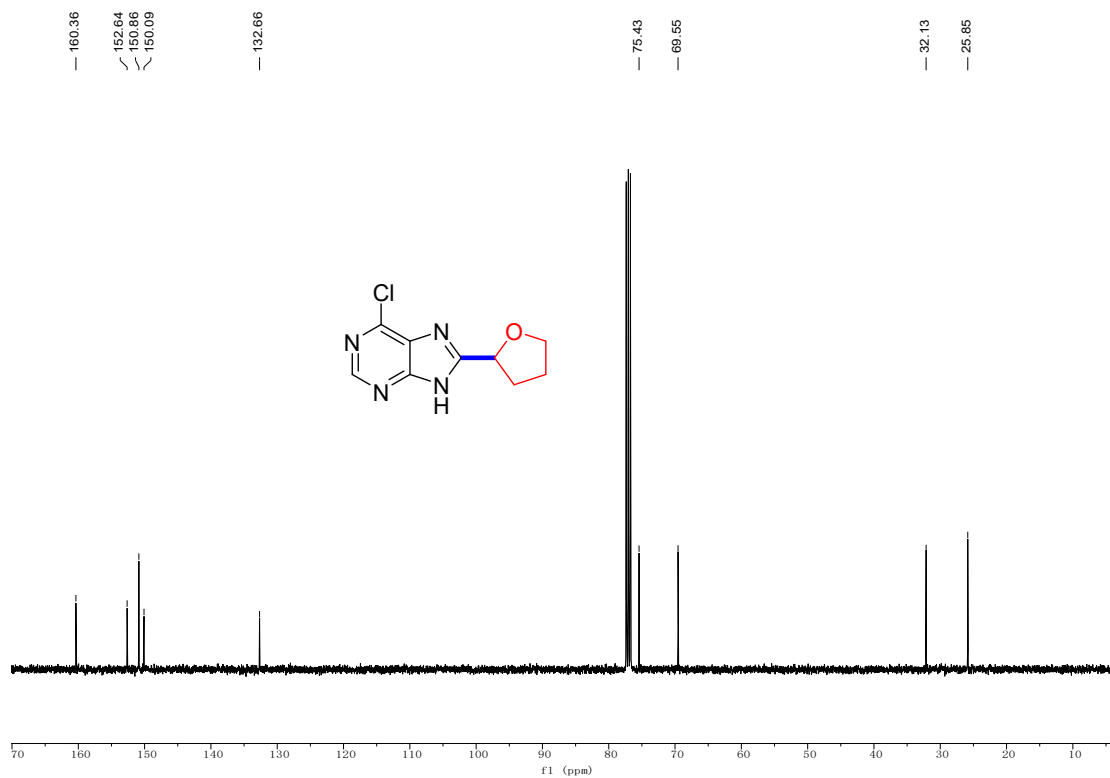

**4b** [ $^1\text{H}$  NMR (400 MHz,  $\text{CDCl}_3$ ),  $^{13}\text{C}$ { $^1\text{H}$ } NMR (101 MHz,  $\text{CDCl}_3$ )]

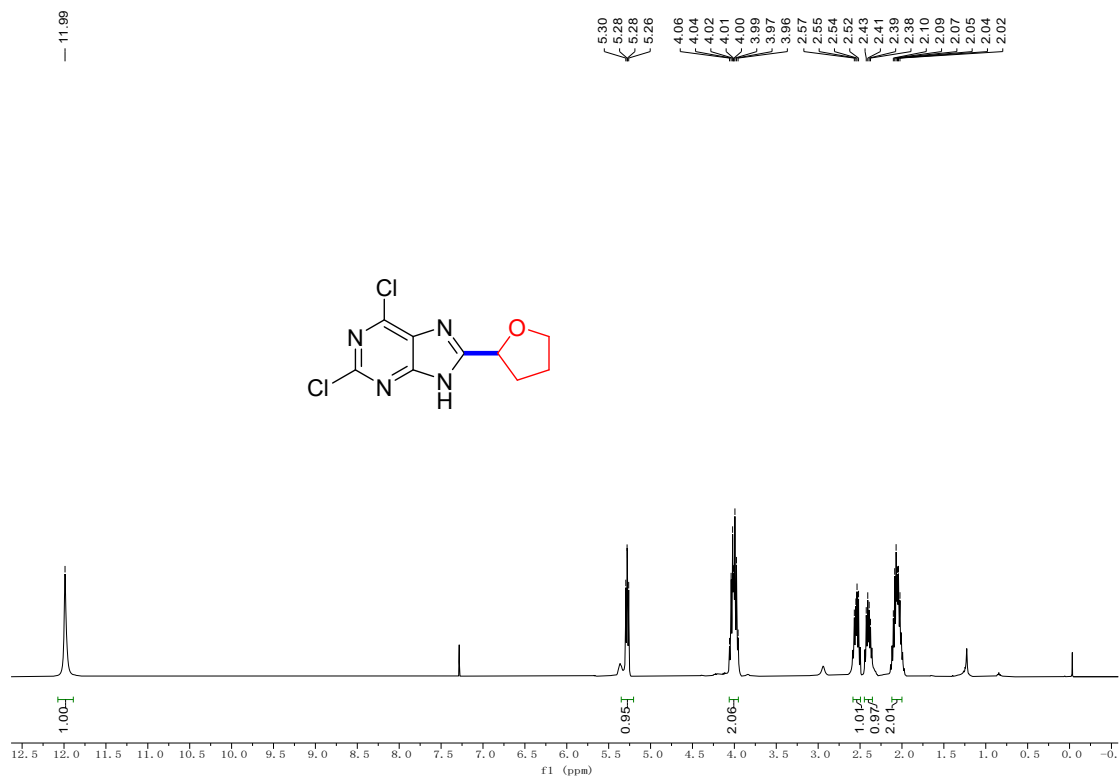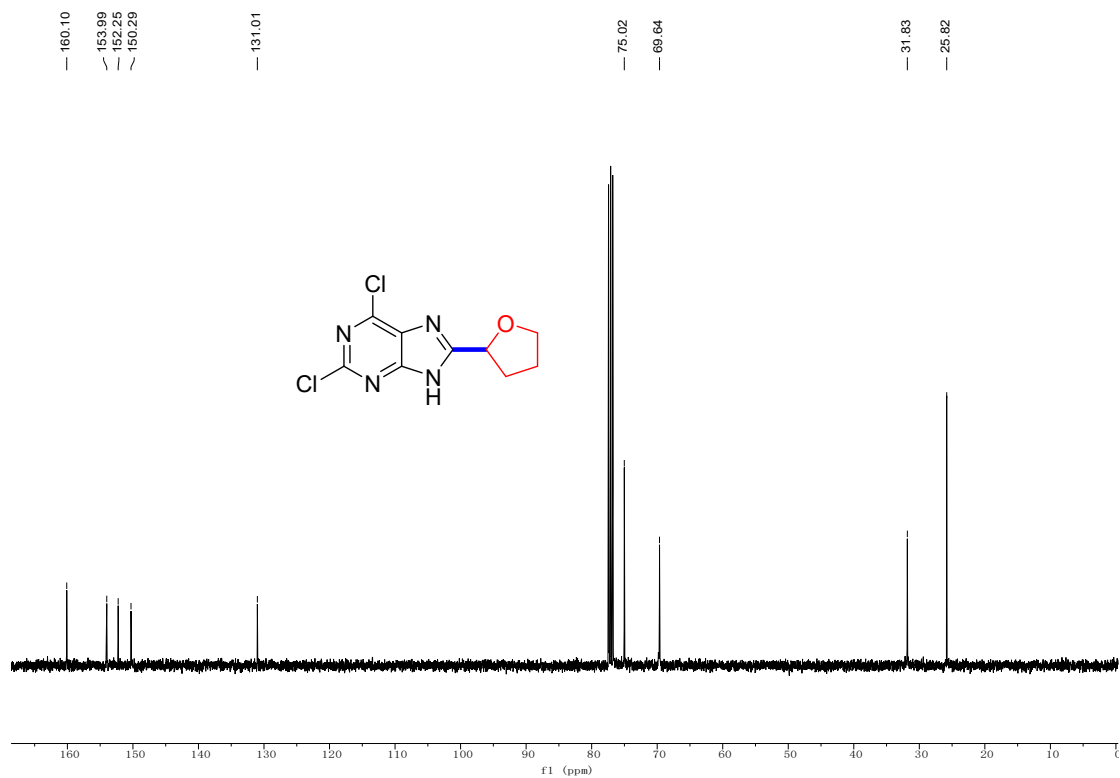



**4c** [ $^1\text{H}$  NMR (400 MHz,  $\text{CDCl}_3$ ),  $^{13}\text{C}\{^1\text{H}\}$  NMR (126 MHz,  $\text{CDCl}_3$ ),  $^{19}\text{F}$  NMR (376 MHz,  $\text{CDCl}_3$ )]

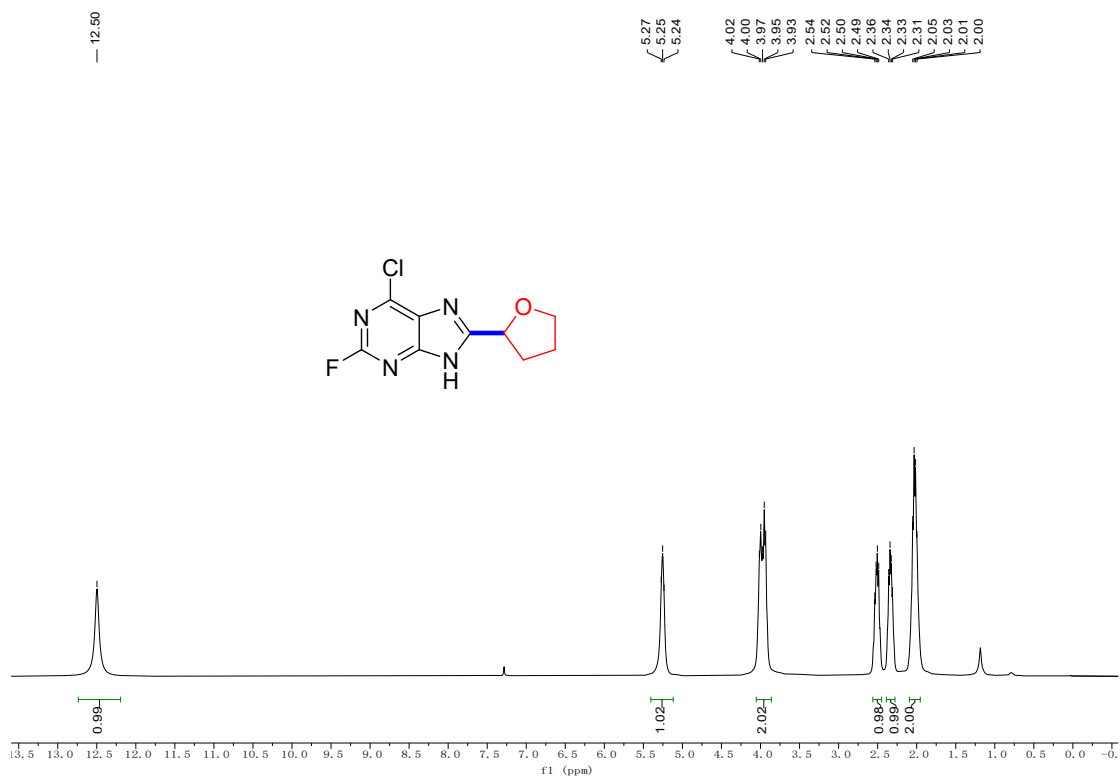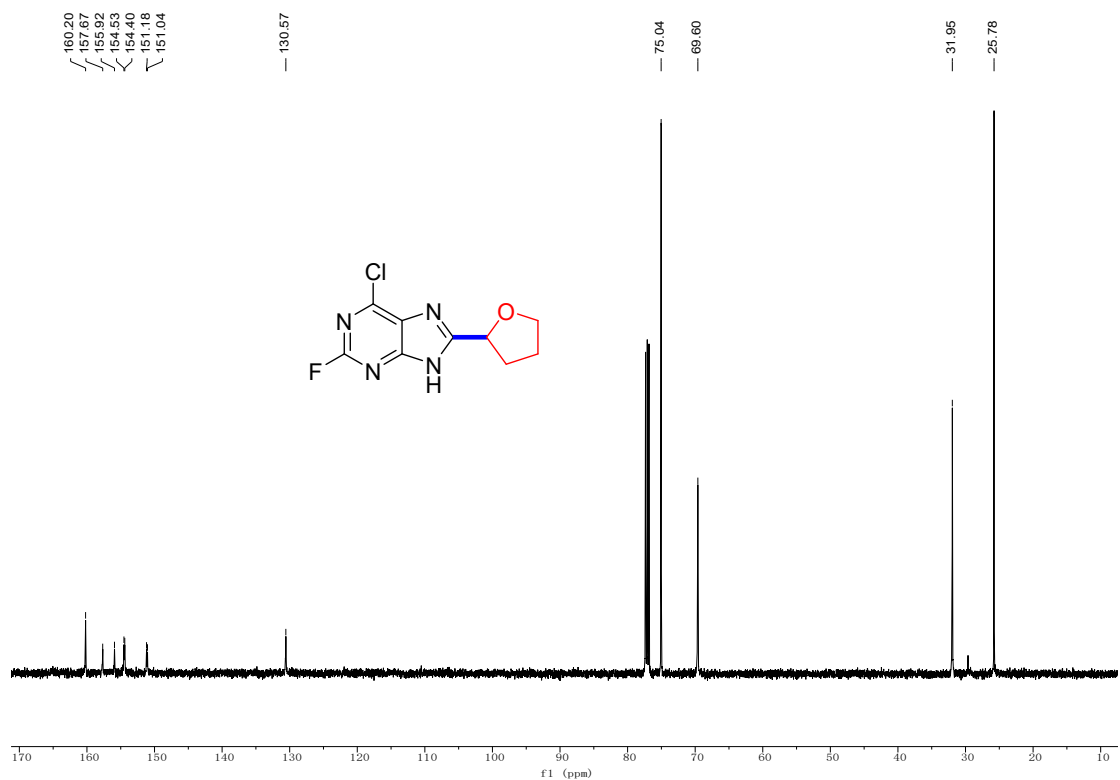

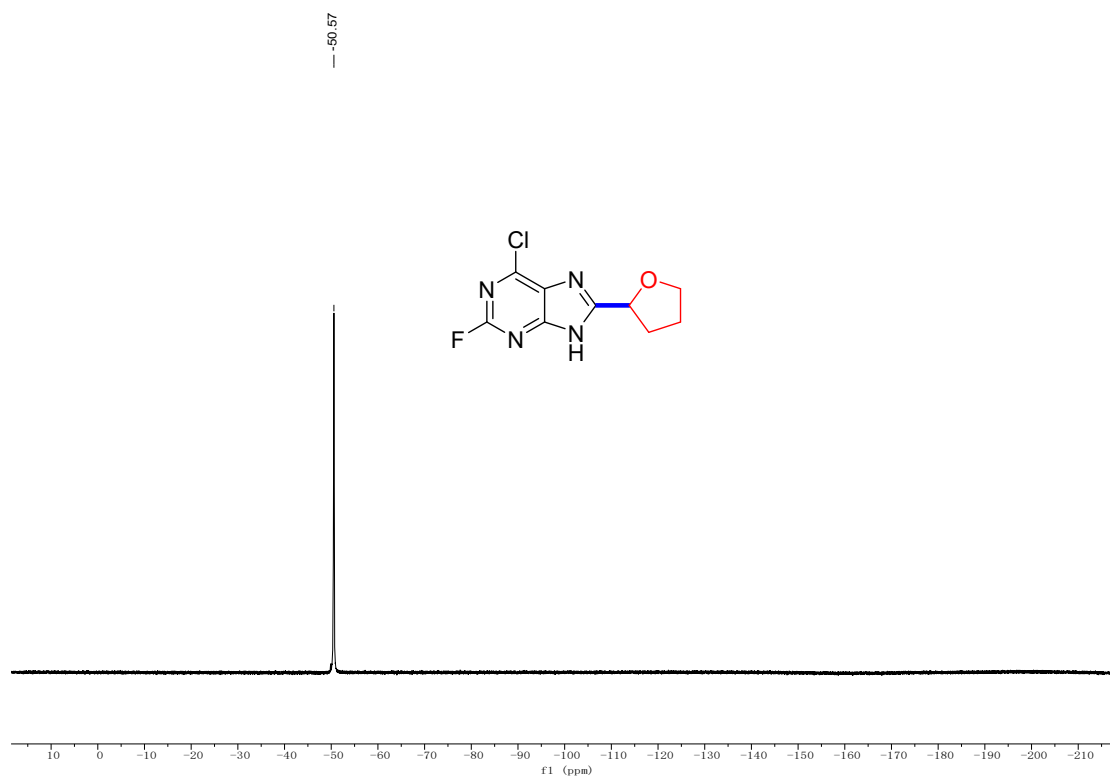

4d [<sup>1</sup>H NMR (400 MHz, CDCl<sub>3</sub>), <sup>13</sup>C{<sup>1</sup>H} NMR (101 MHz, CDCl<sub>3</sub>)]

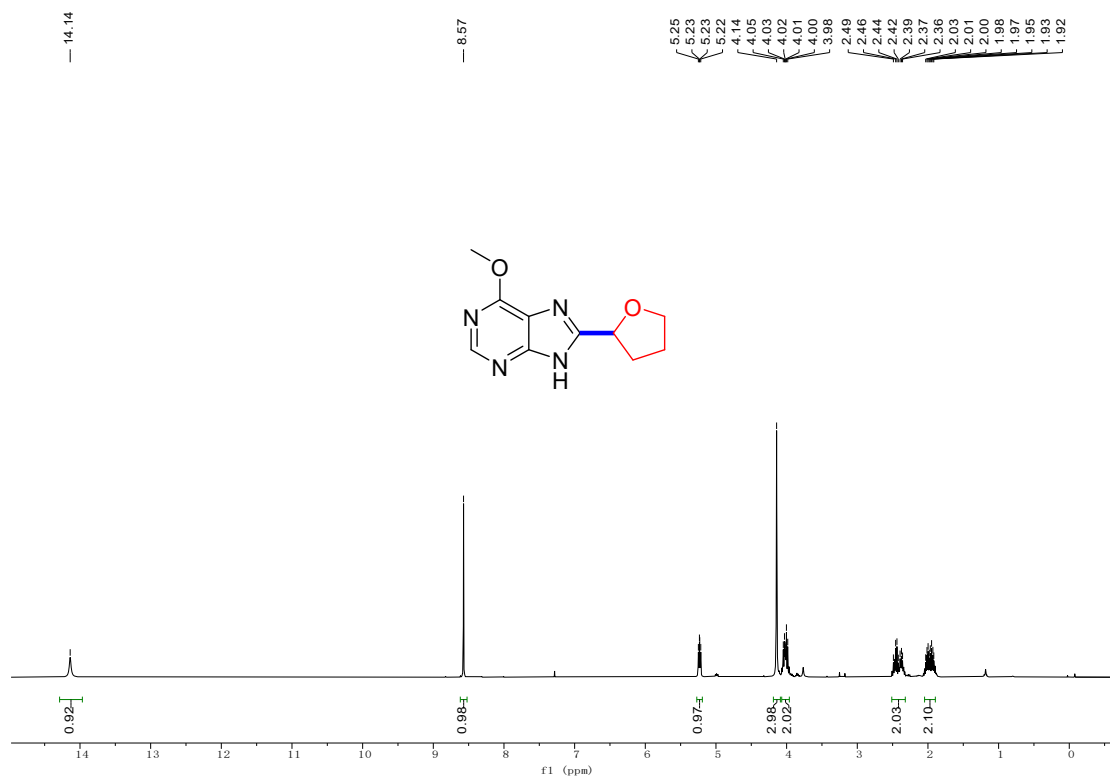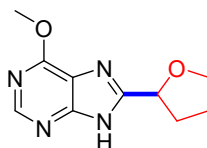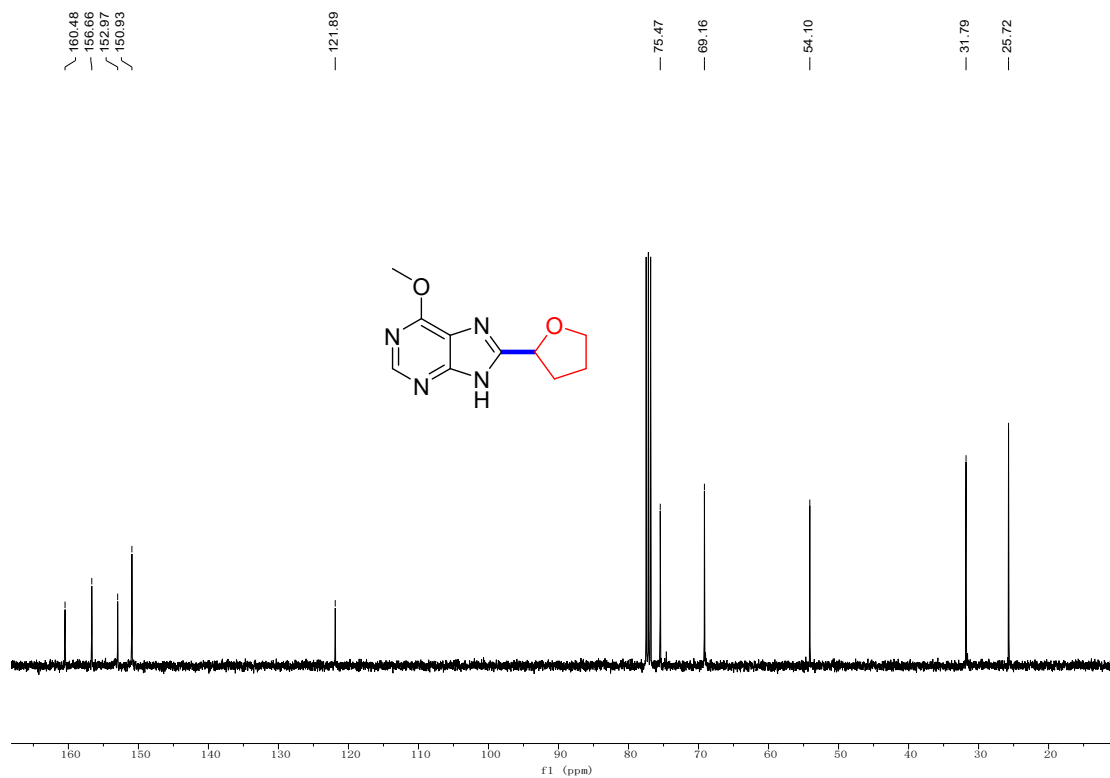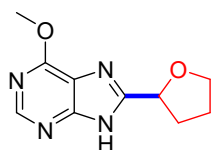

**4e** [ $^1\text{H}$  NMR (400 MHz,  $\text{CDCl}_3$ ),  $^{13}\text{C}\{^1\text{H}\}$  NMR (101 MHz,  $\text{CDCl}_3$ )]

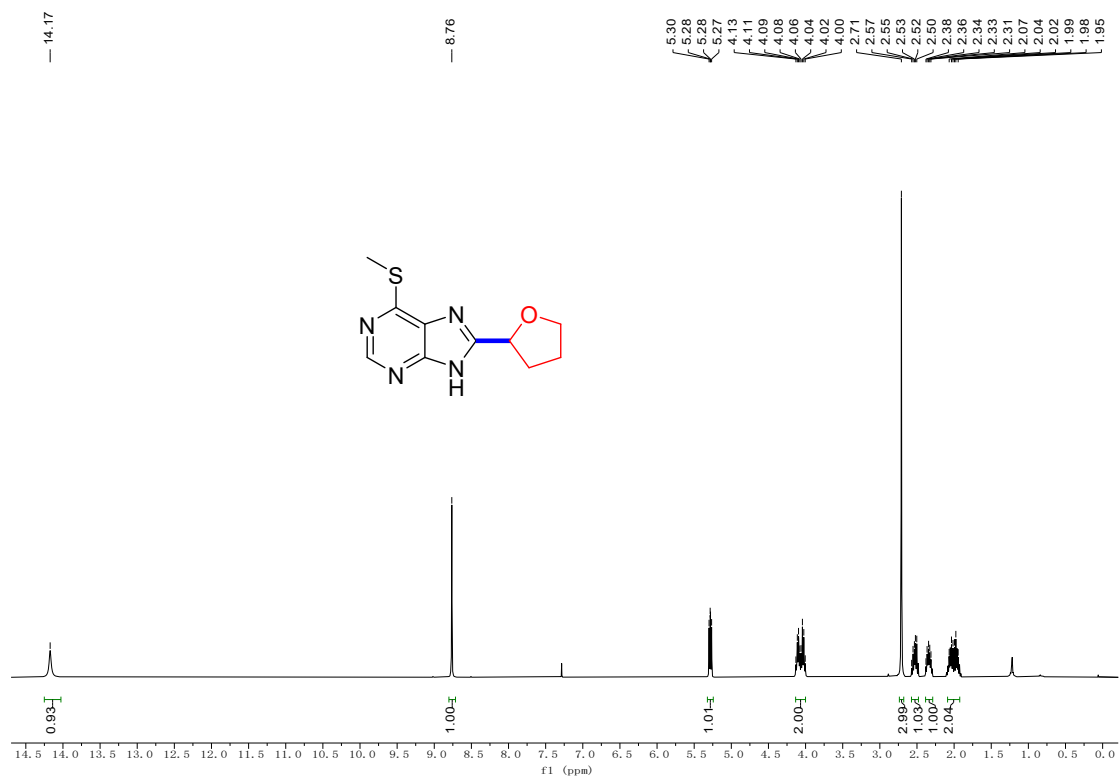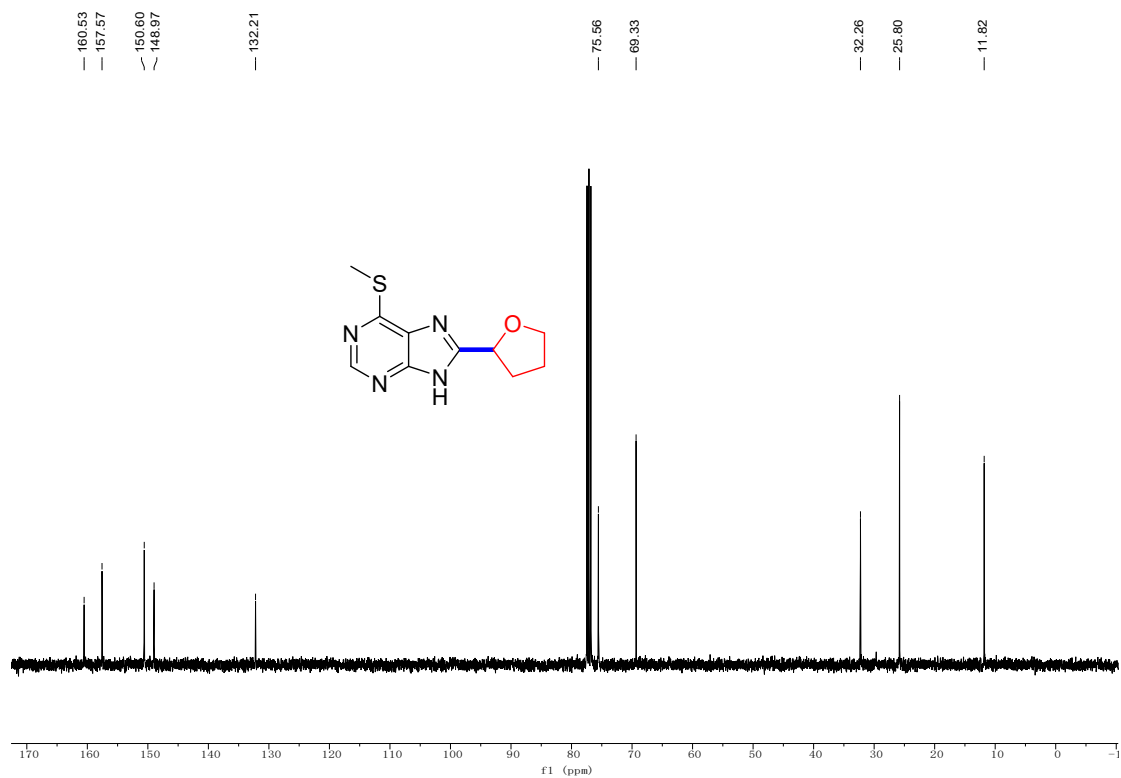

4f [<sup>1</sup>H NMR (400 MHz, CDCl<sub>3</sub>), <sup>13</sup>C{<sup>1</sup>H} NMR (101 MHz, CDCl<sub>3</sub>)]

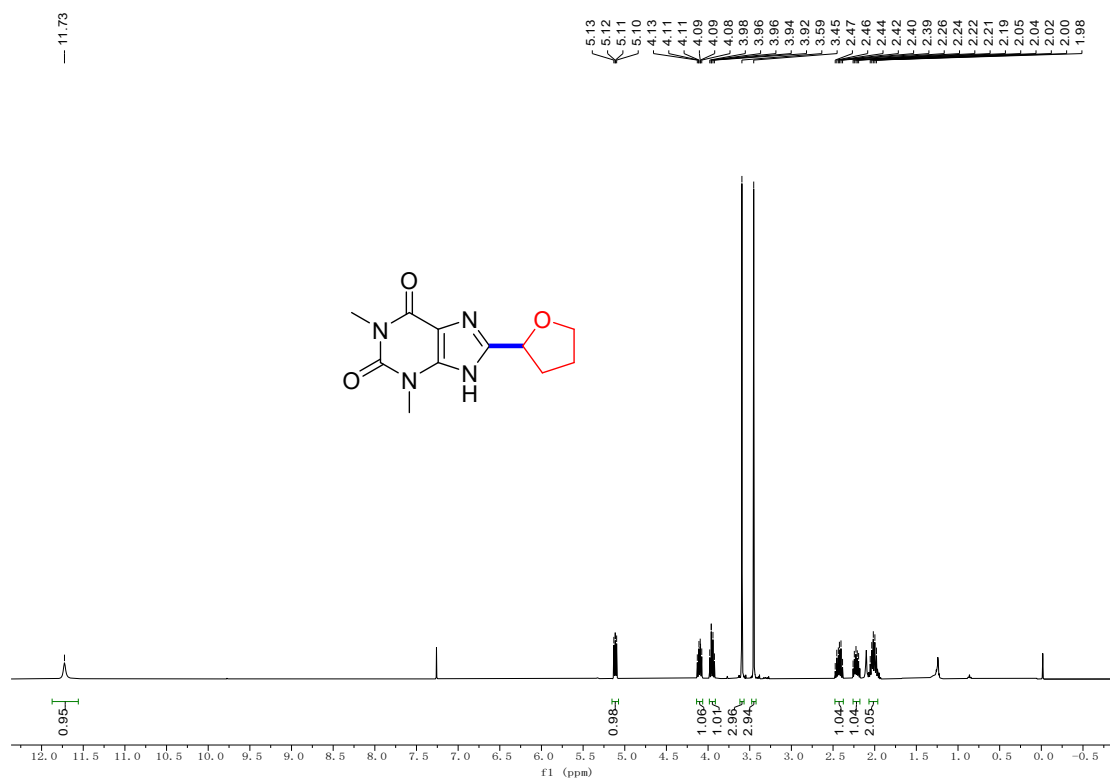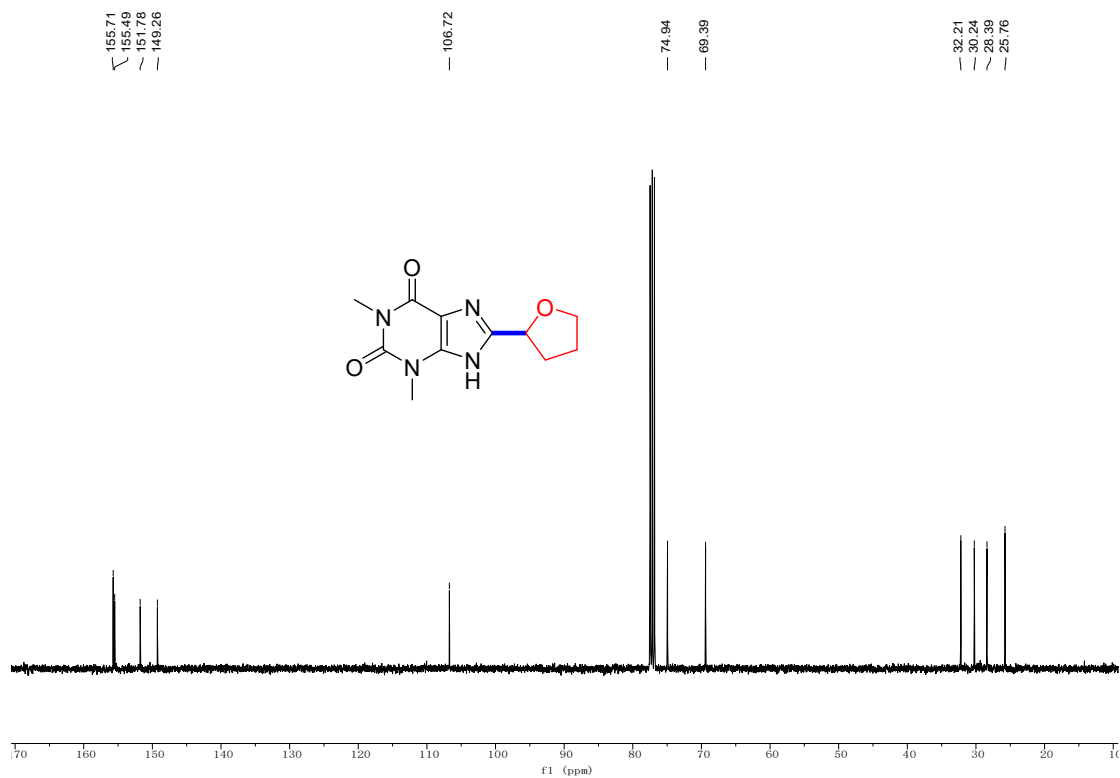

**4g** [ $^1\text{H}$  NMR (400 MHz,  $\text{DMSO-}d_6$ ),  $^{13}\text{C}\{^1\text{H}\}$  NMR (101 MHz,  $\text{DMSO-}d_6$ )]

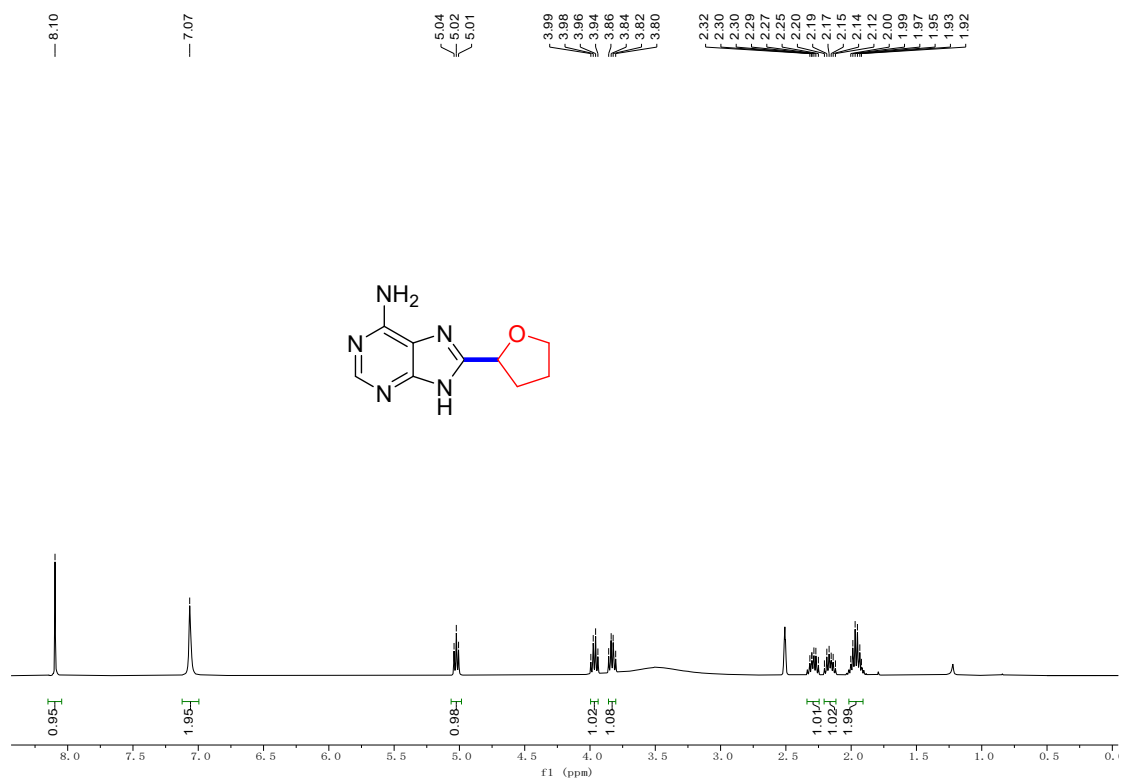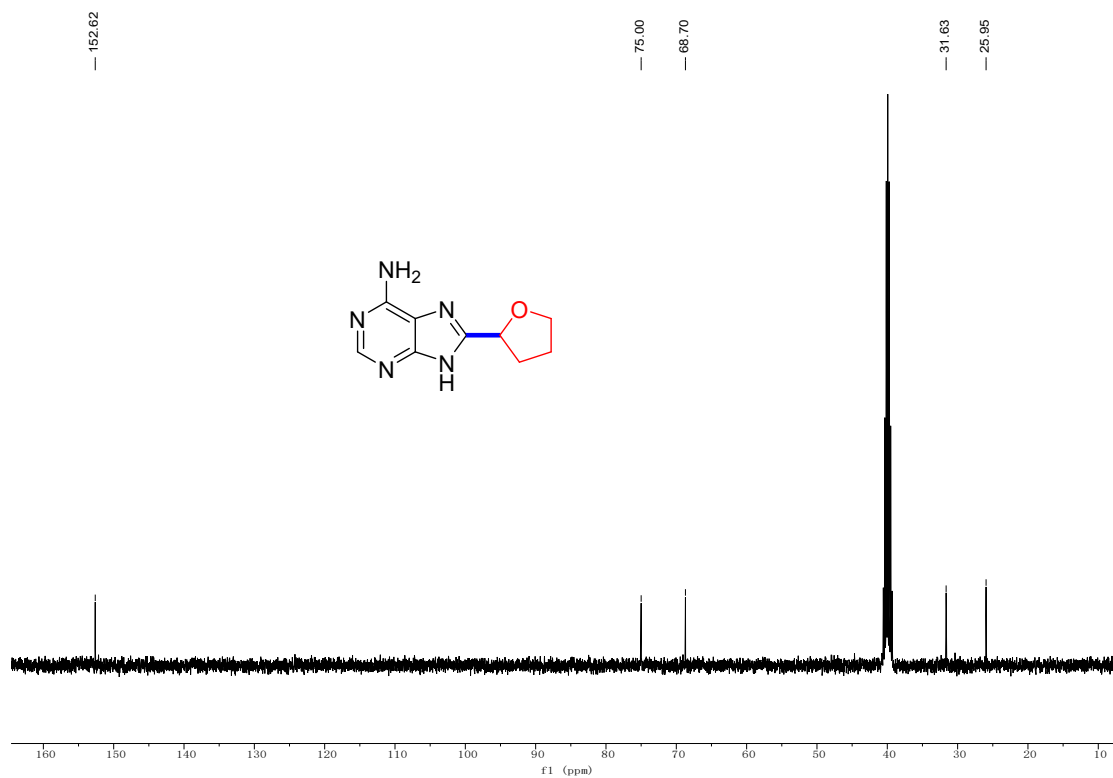

4h [<sup>1</sup>H NMR (500 MHz, DMSO-d<sub>6</sub>), <sup>13</sup>C{<sup>1</sup>H} NMR (126 MHz, DMSO-d<sub>6</sub>)]

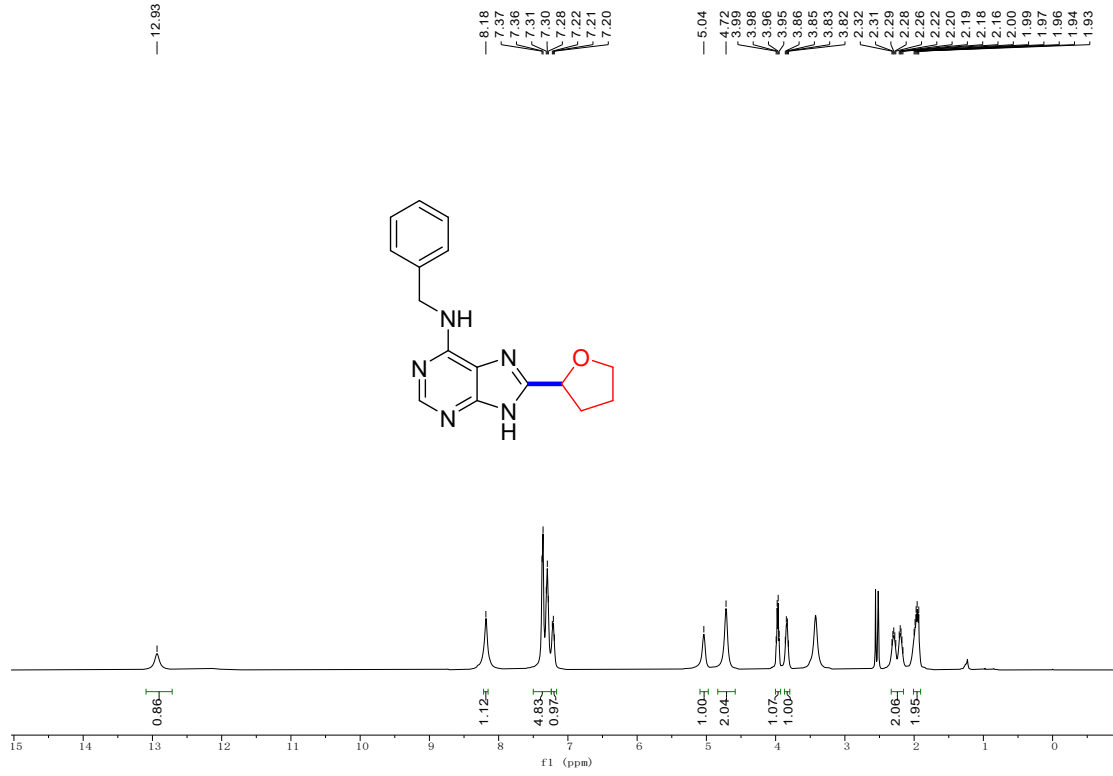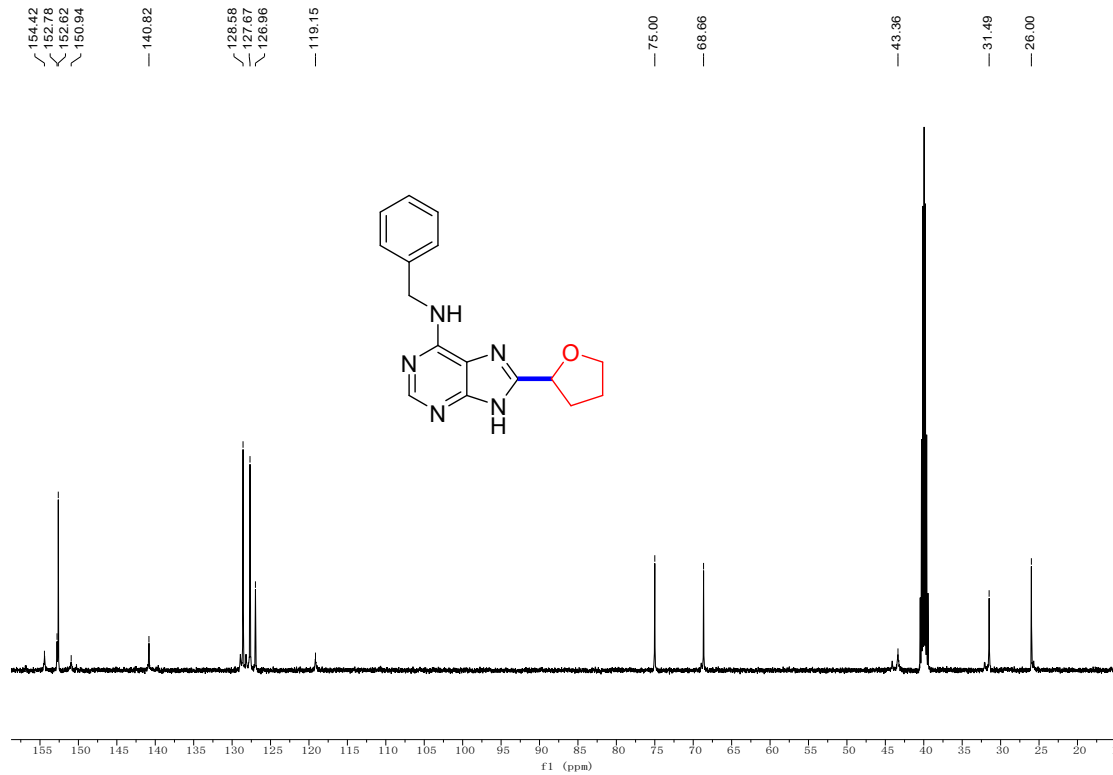

4i [<sup>1</sup>H NMR (400 MHz, CDCl<sub>3</sub>), <sup>13</sup>C{<sup>1</sup>H} NMR (101 MHz, CDCl<sub>3</sub>)]

7.59, 7.27, 7.26, 7.25, 7.24, 7.23, 5.29, 5.28, 5.27, 5.26, 4.05, 4.04, 4.03, 4.02, 4.01, 3.99, 3.98, 3.97, 3.97, 2.55, 2.53, 2.51, 2.50, 2.48, 2.46, 2.41, 2.39, 2.37, 2.36, 2.34, 2.33, 2.08, 2.07, 2.05, 2.03, 2.02, 2.00, 1.98, 1.97, 1.95

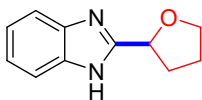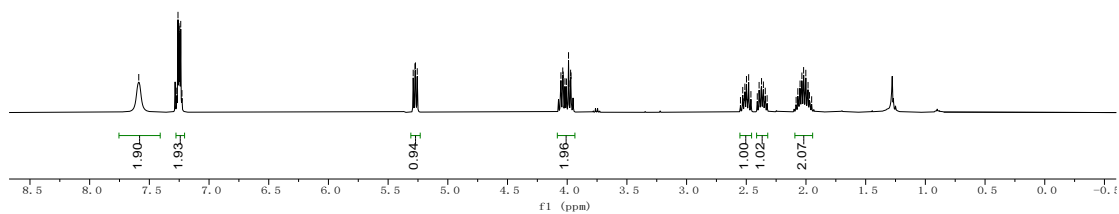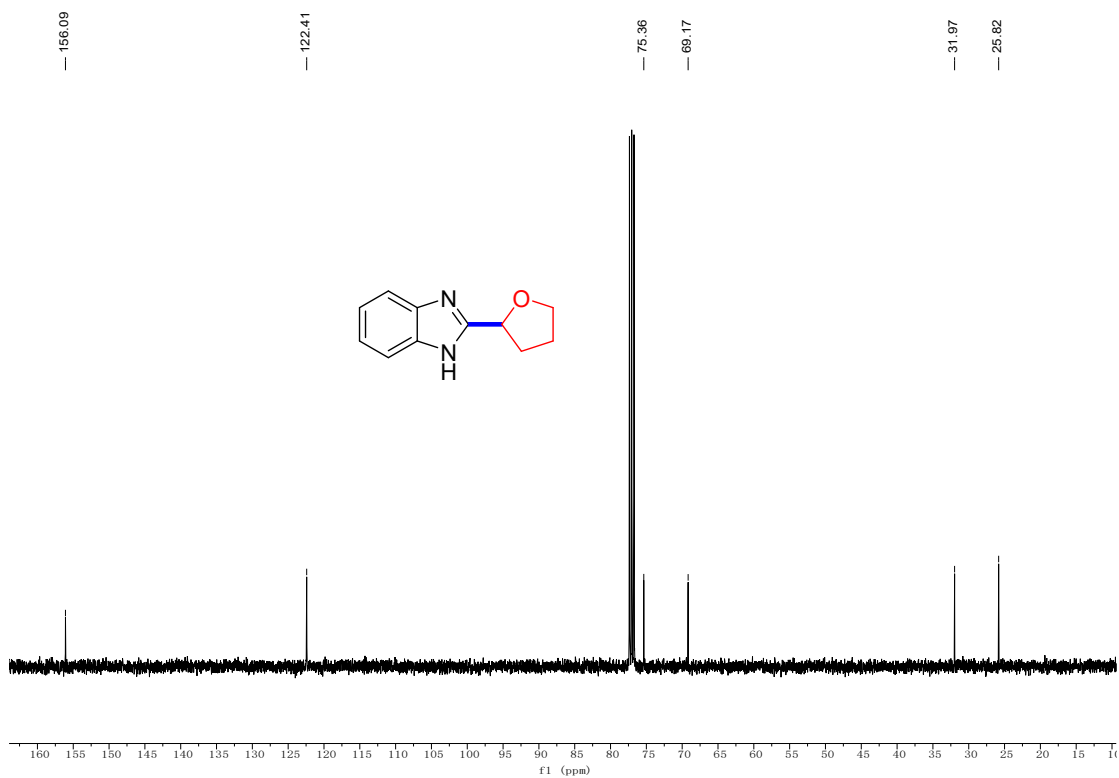



5a [<sup>1</sup>H NMR (400 MHz, CDCl<sub>3</sub>), <sup>13</sup>C{<sup>1</sup>H} NMR (101 MHz, CDCl<sub>3</sub>)]

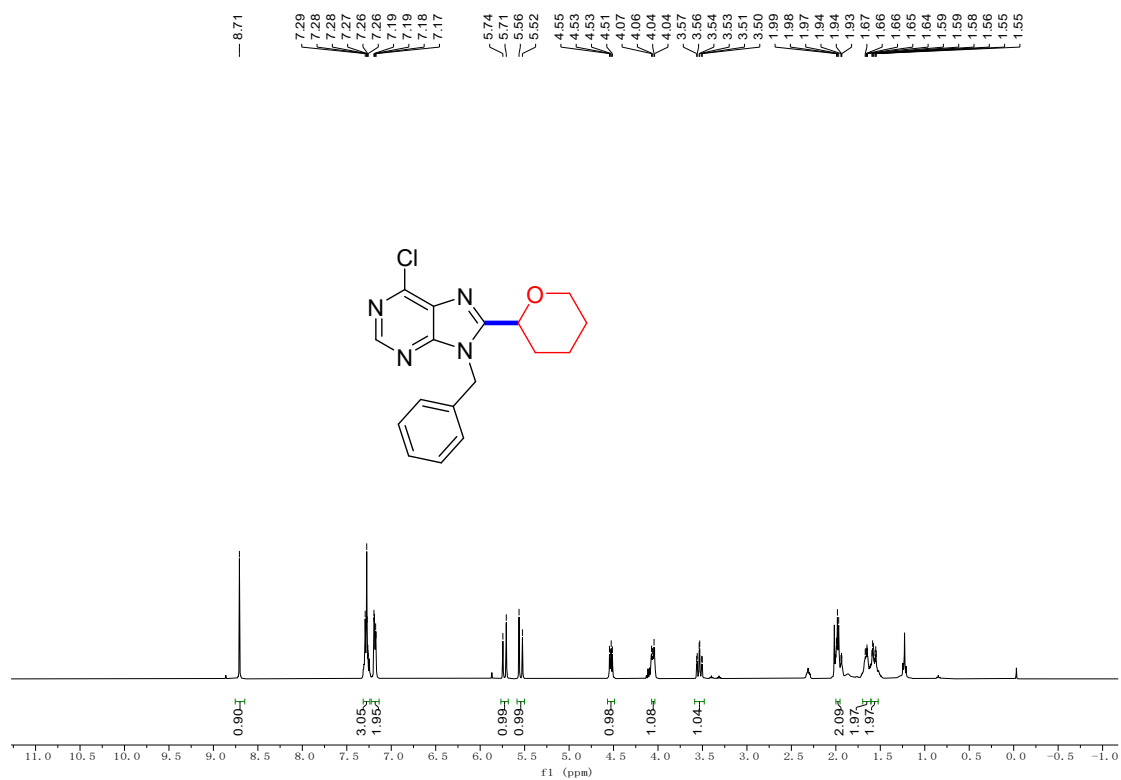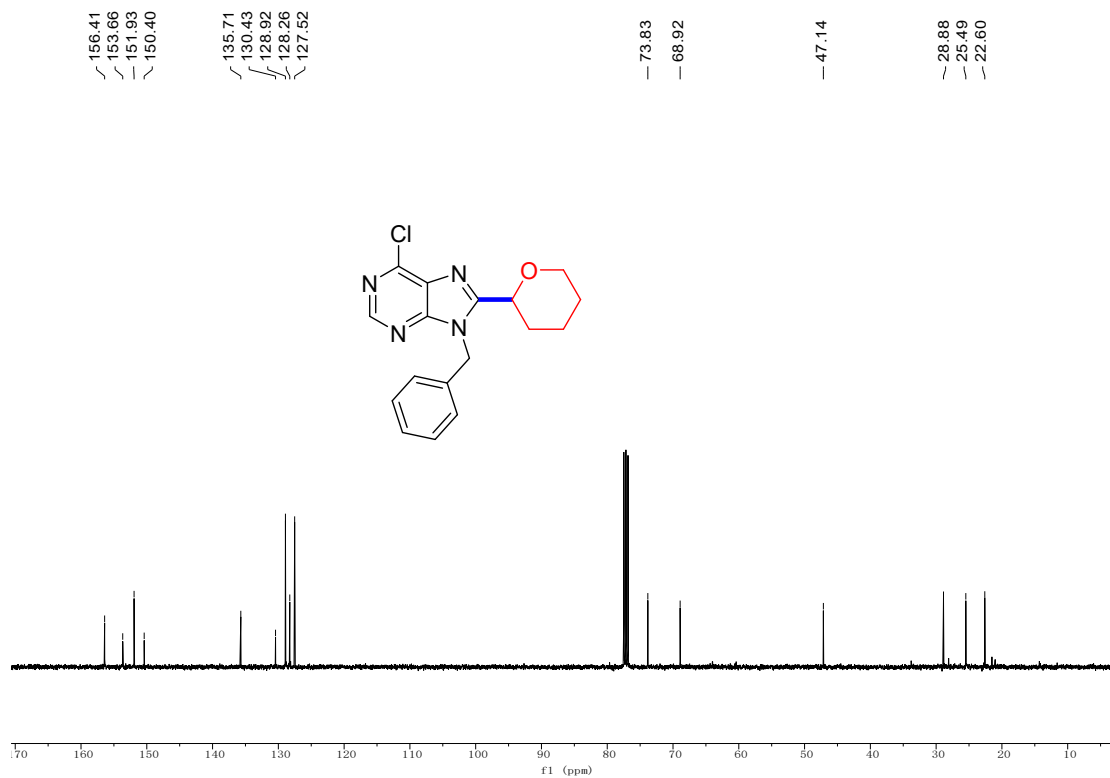

**5b** [ $^1\text{H}$  NMR (400 MHz,  $\text{CDCl}_3$ ),  $^{13}\text{C}$ { $^1\text{H}$ } NMR (101 MHz,  $\text{CDCl}_3$ )]

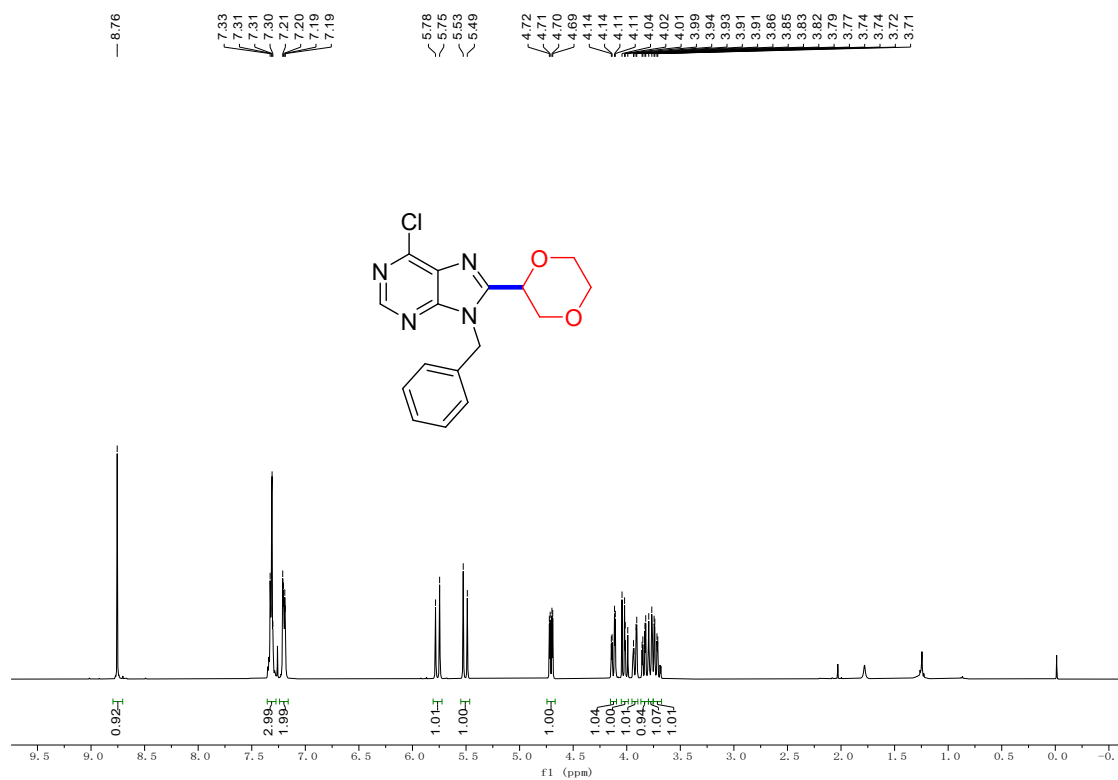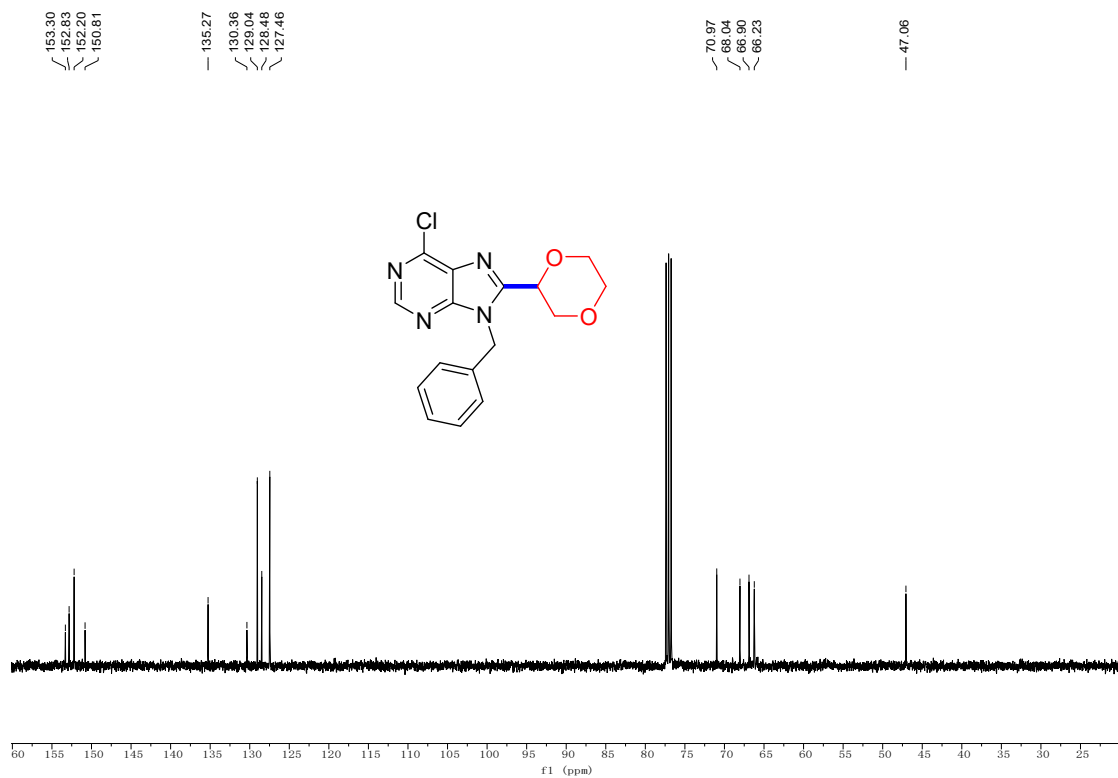

5c [<sup>1</sup>H NMR (500 MHz, CDCl<sub>3</sub>), <sup>13</sup>C{<sup>1</sup>H} NMR (126 MHz, CDCl<sub>3</sub>)]

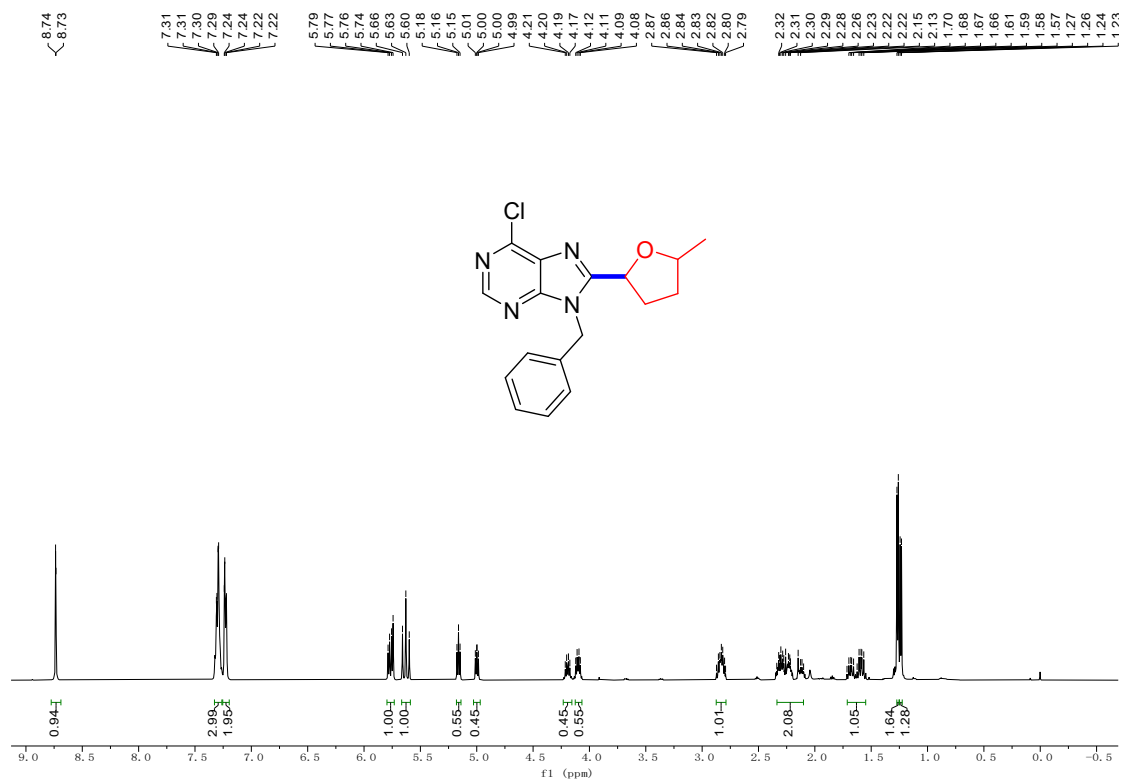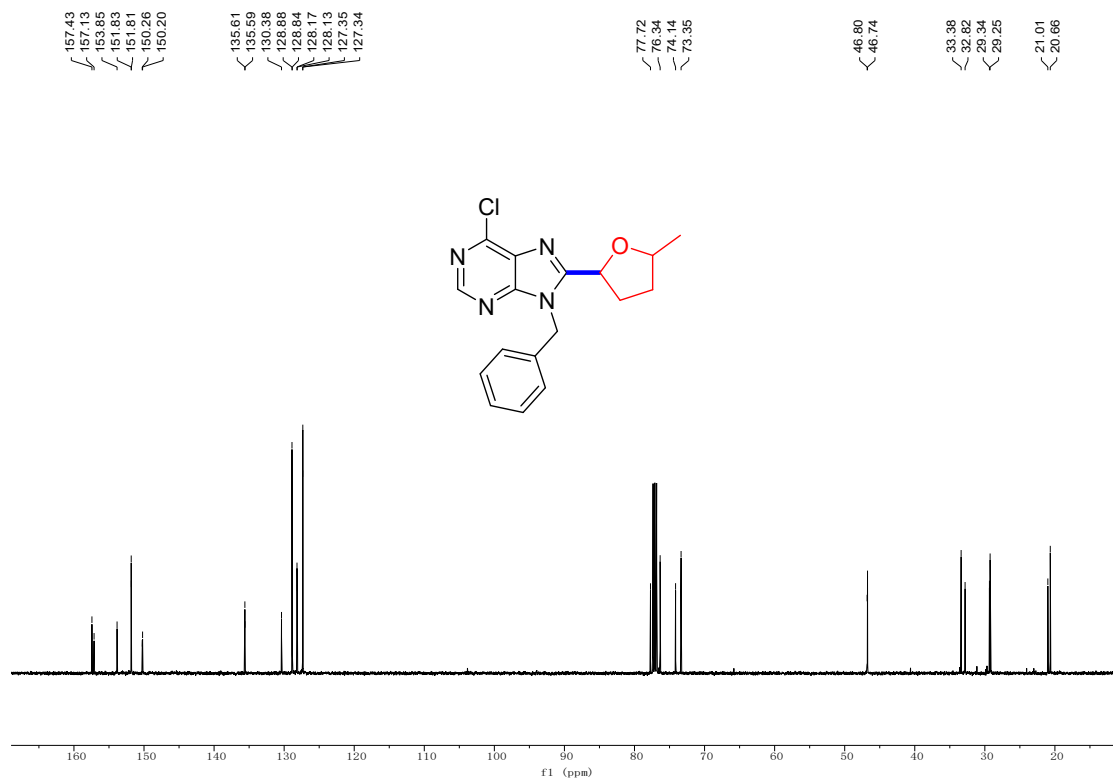

5c' [<sup>1</sup>H NMR (500 MHz, CDCl<sub>3</sub>), <sup>13</sup>C{<sup>1</sup>H} NMR (126 MHz, CDCl<sub>3</sub>)]

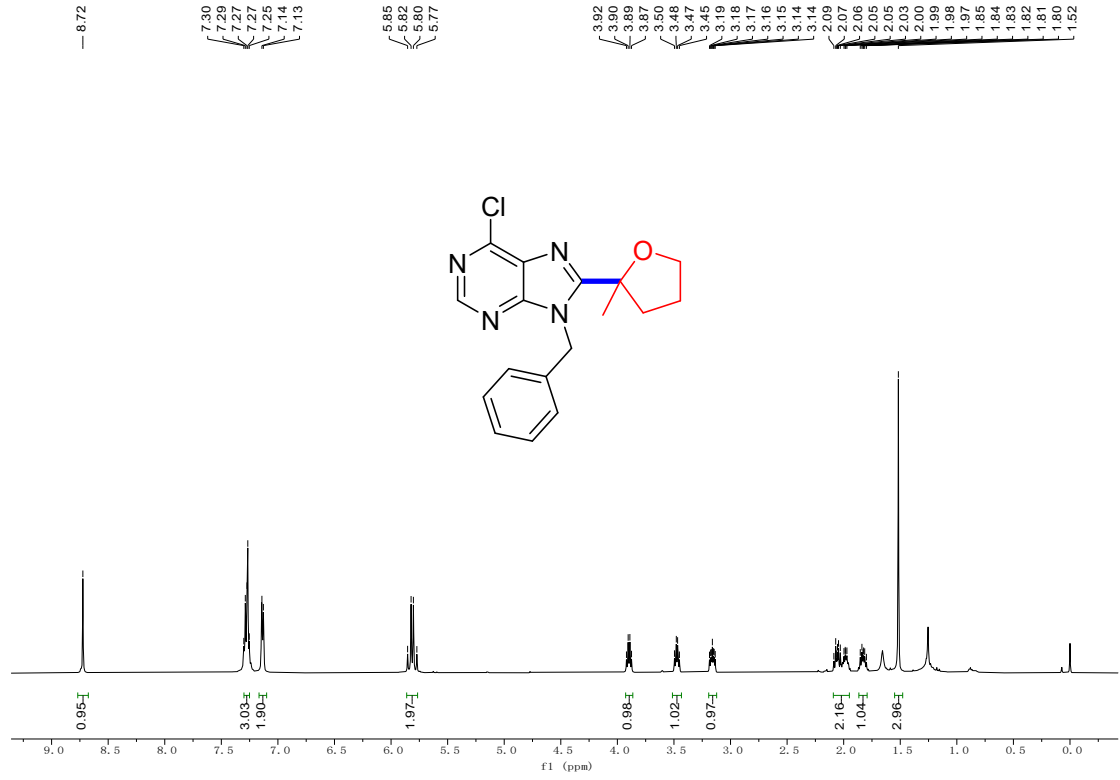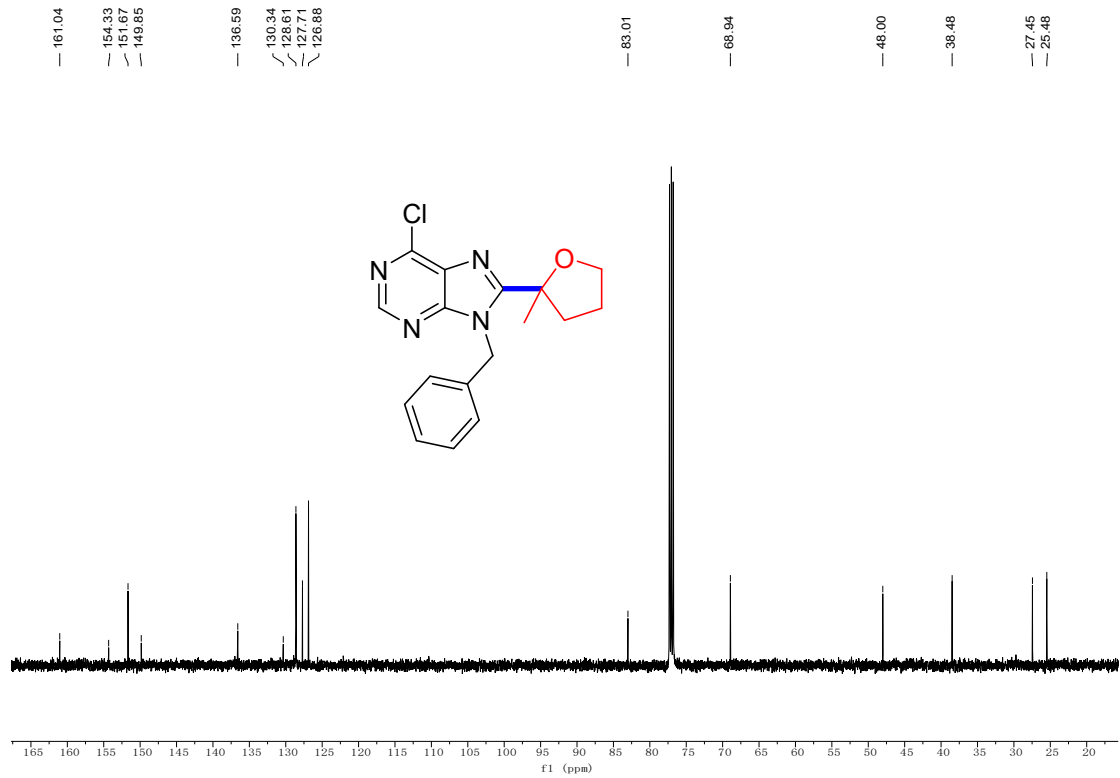

5d [ $^1\text{H}$  NMR (400 MHz,  $\text{CDCl}_3$ ),  $^{13}\text{C}\{^1\text{H}\}$  NMR (101 MHz,  $\text{CDCl}_3$ )]

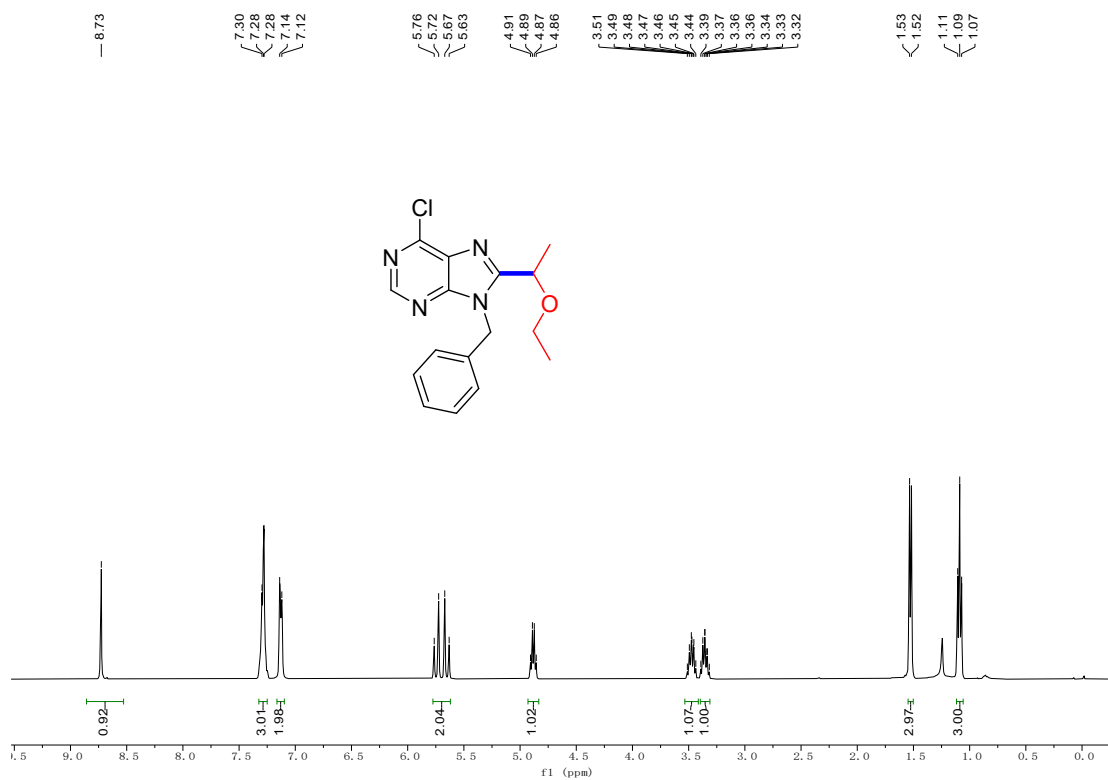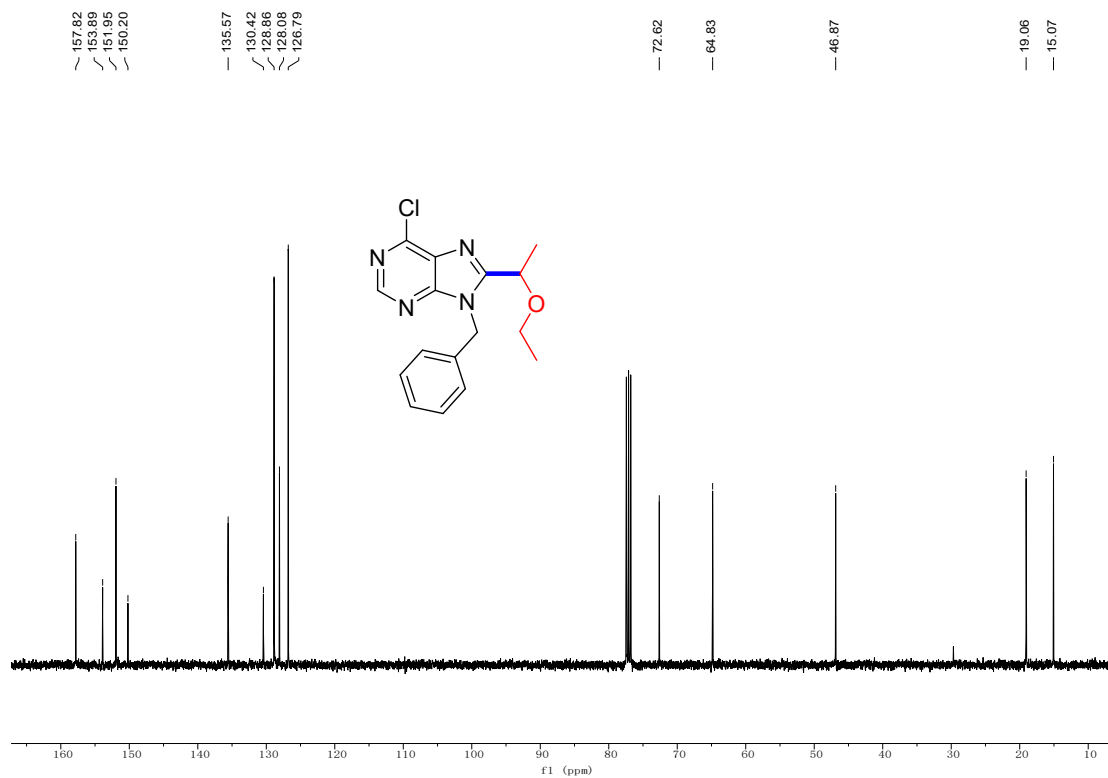

**5e** [ $^1\text{H}$  NMR (500 MHz,  $\text{CDCl}_3$ ),  $^{13}\text{C}\{^1\text{H}\}$  NMR (126 MHz,  $\text{CDCl}_3$ )]

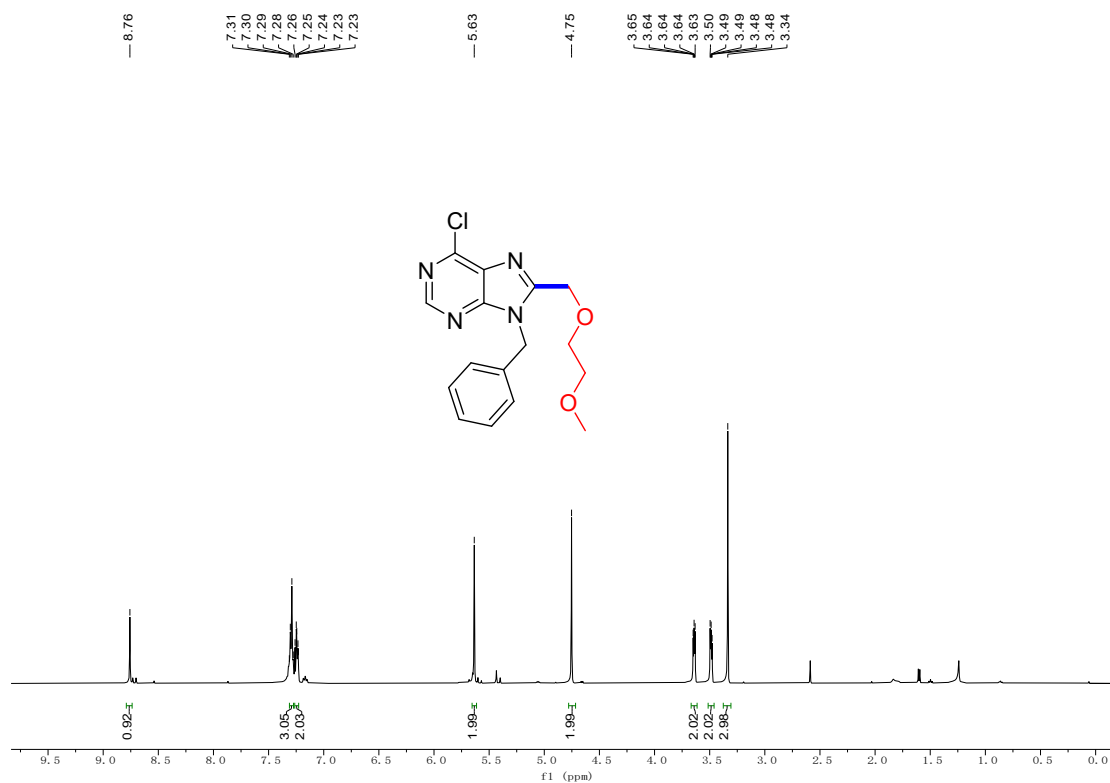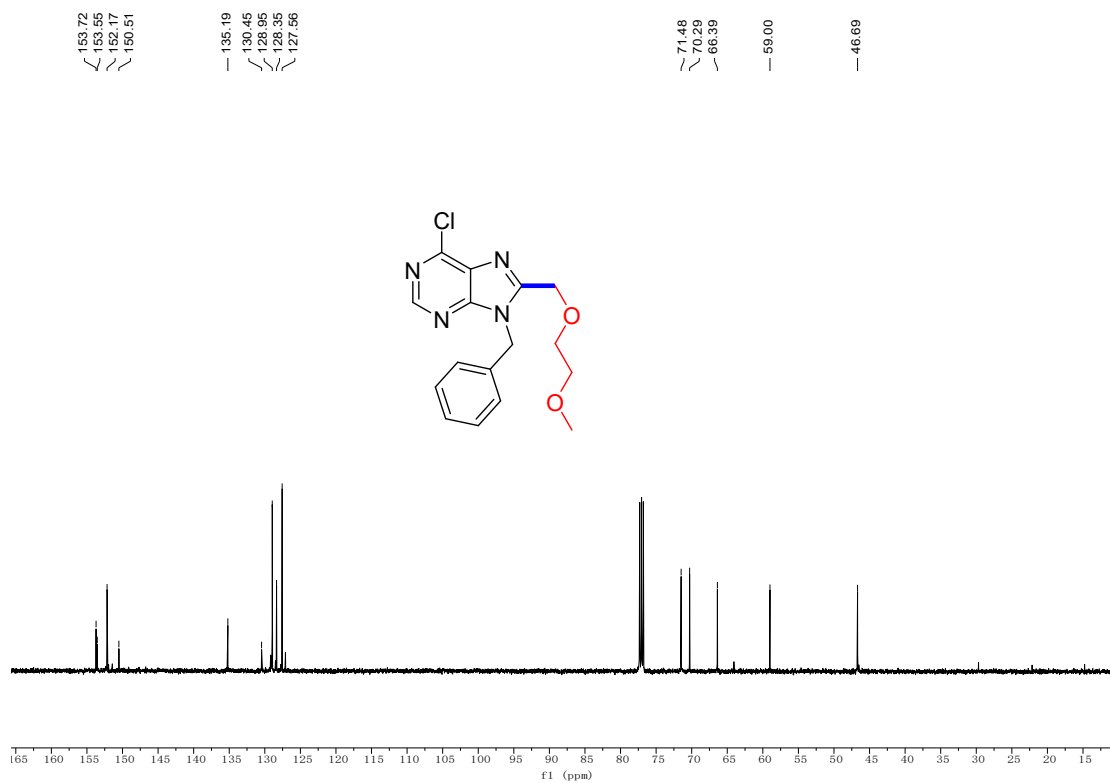

5e' [<sup>1</sup>H NMR (400 MHz, CDCl<sub>3</sub>), <sup>13</sup>C{<sup>1</sup>H} NMR (101 MHz, CDCl<sub>3</sub>)]

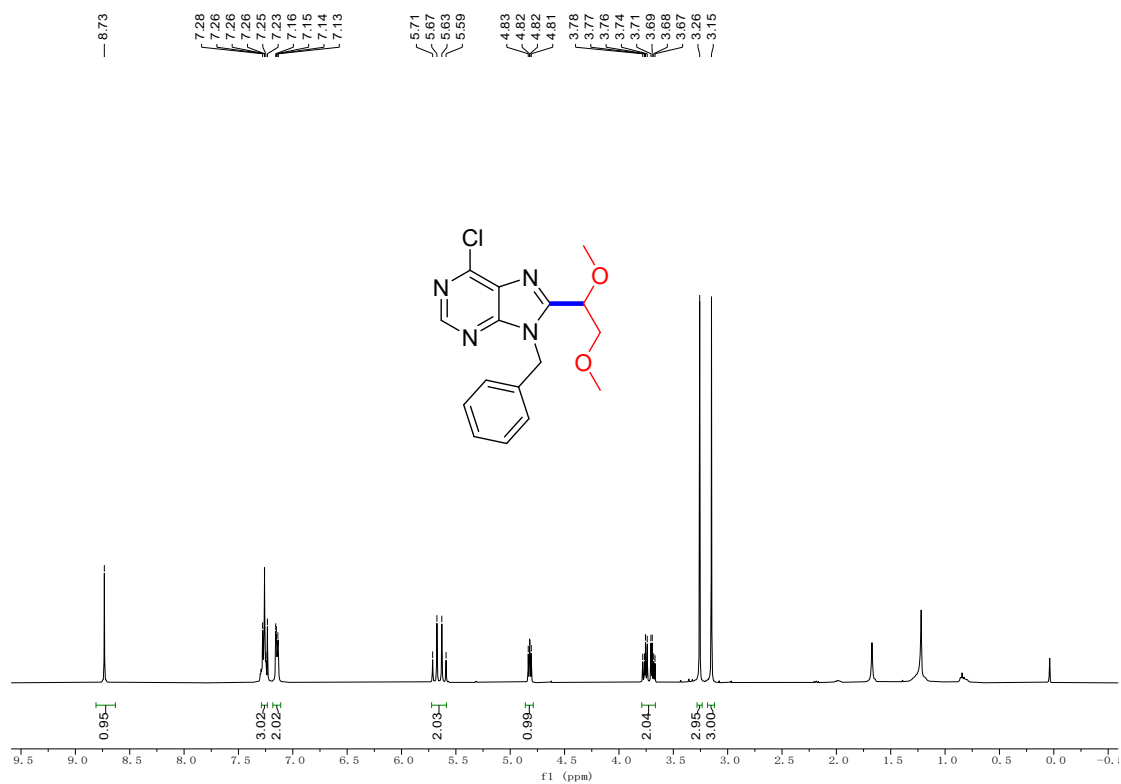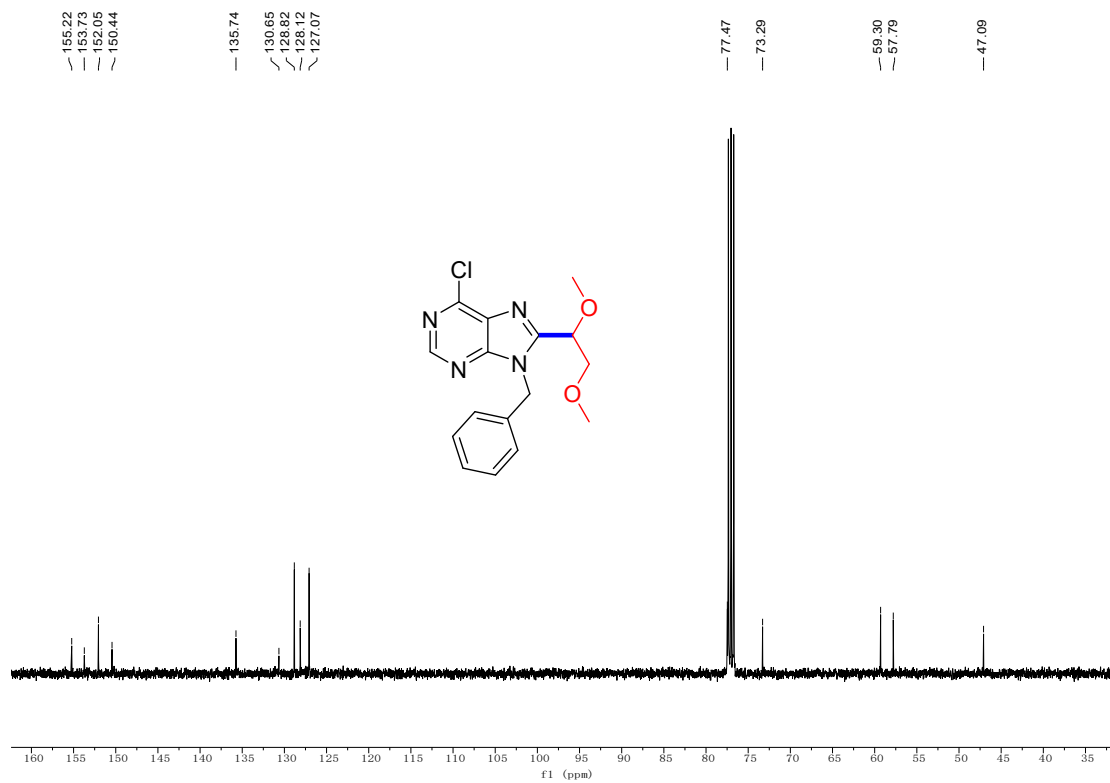

5e'' [<sup>1</sup>H NMR (400 MHz, CDCl<sub>3</sub>), <sup>13</sup>C{<sup>1</sup>H} NMR (101 MHz, CDCl<sub>3</sub>)]

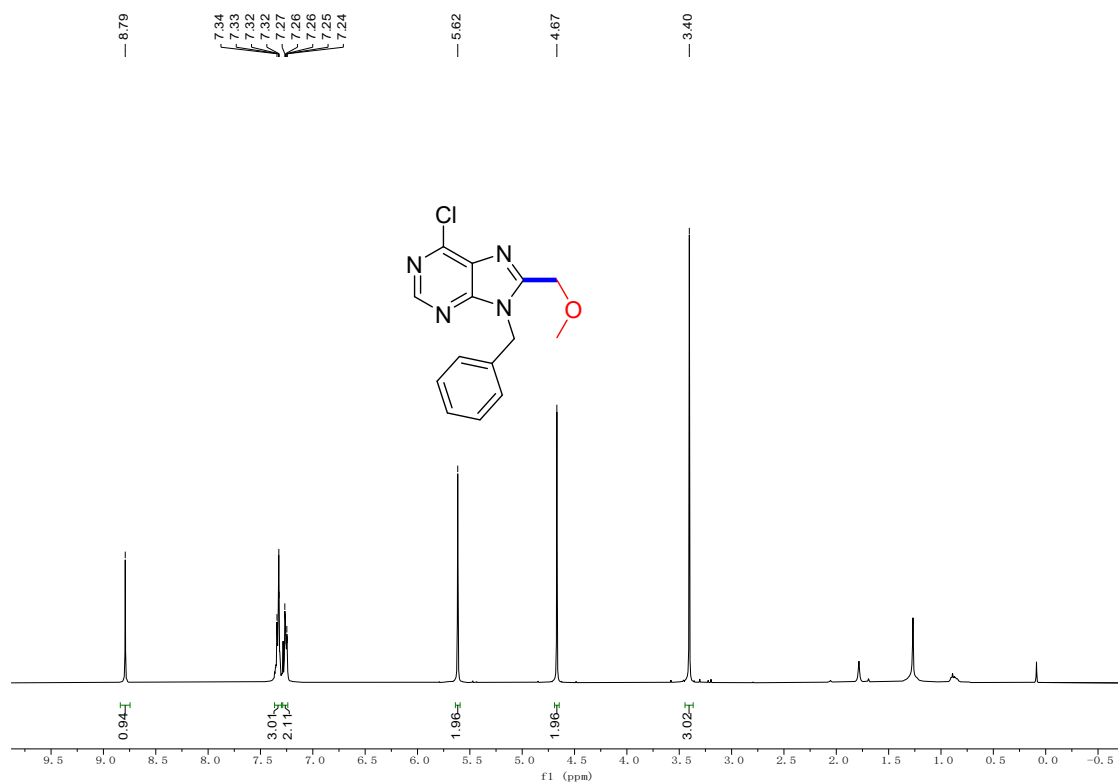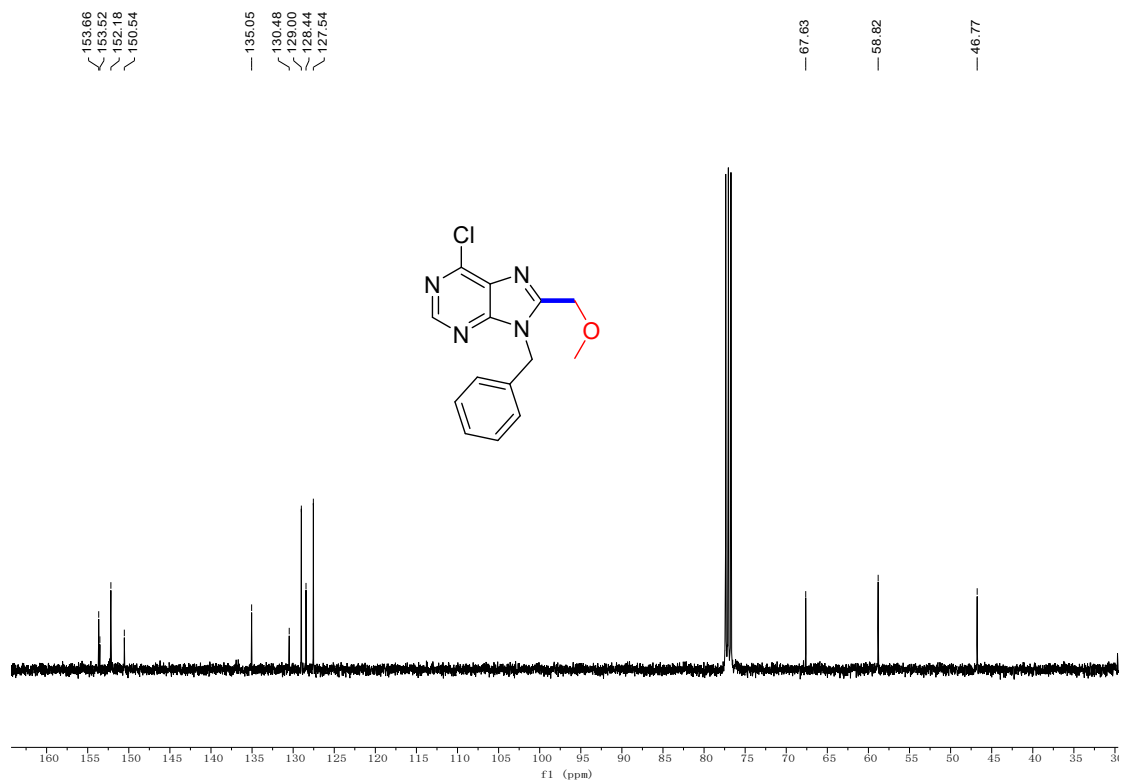



5f [ $^1\text{H}$  NMR (400 MHz,  $\text{CDCl}_3$ ),  $^{13}\text{C}\{^1\text{H}\}$  NMR (101 MHz,  $\text{CDCl}_3$ )]

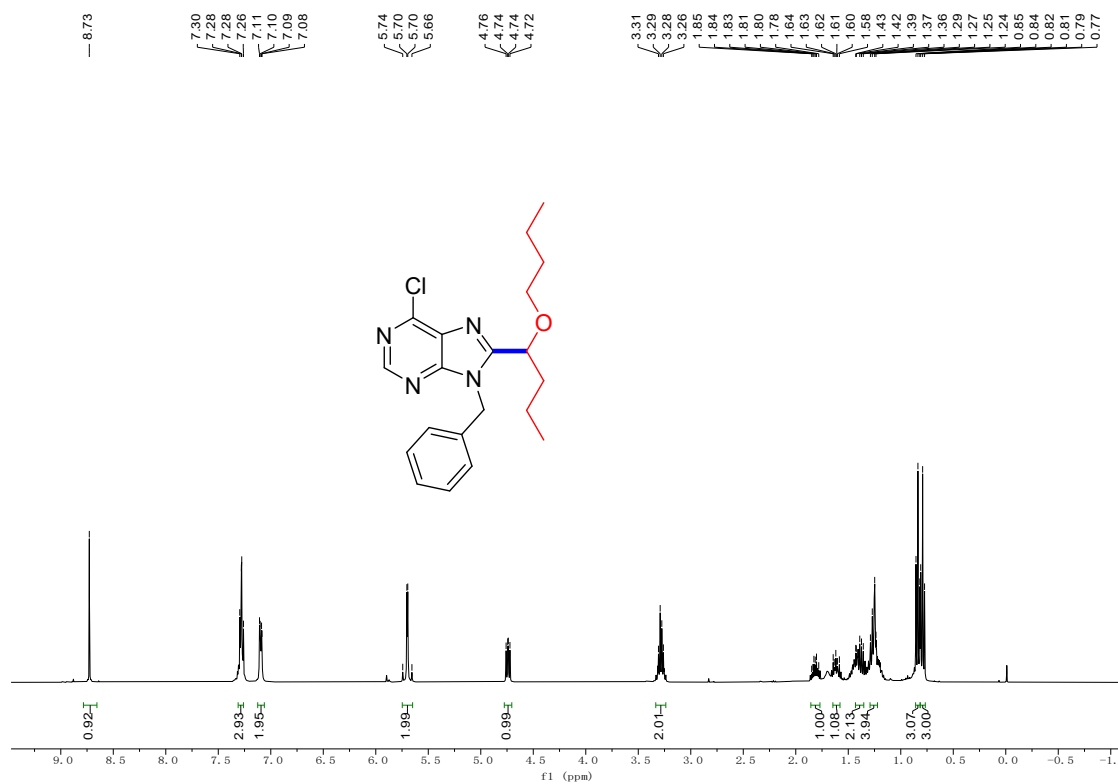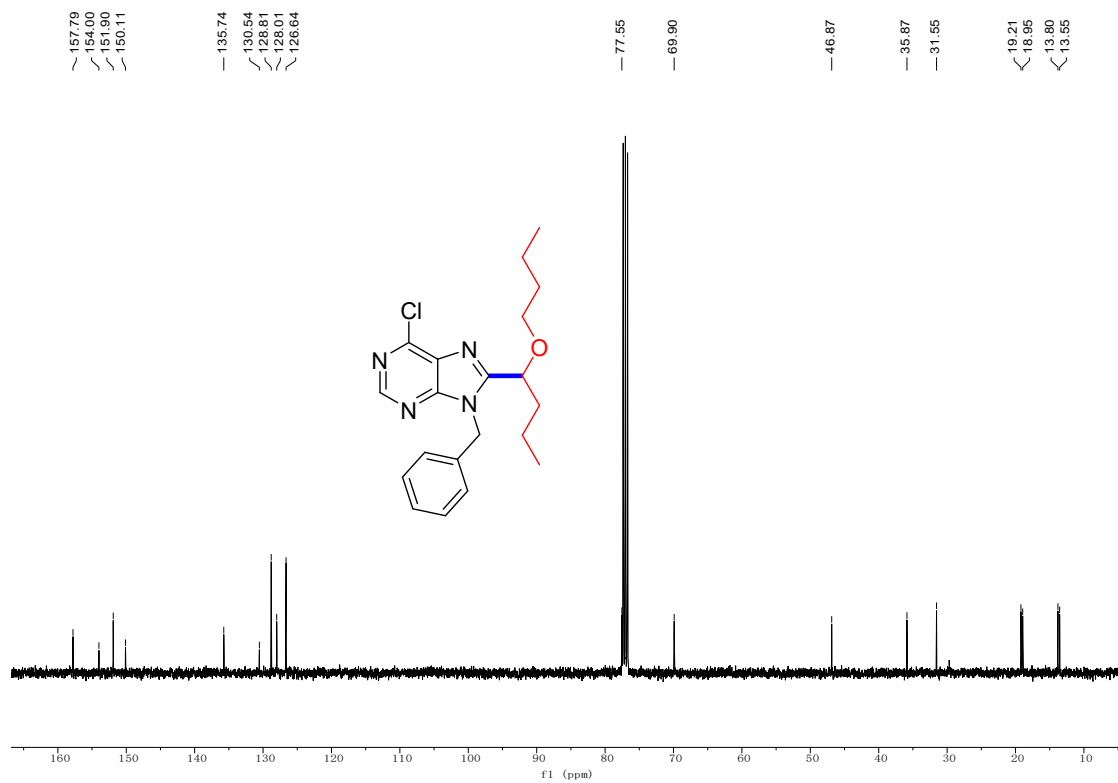

## XI. References

1. L. K. Huang, Y. C. Cherng, Y.-R. Cheng, J.-P. Jang, Y.-L. Chao and Y.-J. Cherng, *Tetrahedron*, 2007, **63**, 5323-5327.
2. J. L. Kelley, R. G. Davis, E. W. McLean, R. C. Glen, F. E. Soroko and B. R. Cooper, *J. Med. Chem.*, 1995, **38**, 3884-3888.
3. G. Dilek Celik, A. Disli, Y. Oner and L. Acik, *Chem. Pharm. Bull.*, 2012, **60**, 578-582.
